# Supplementary material for: 4-Chloro-3-nitrocoumarin as a precursor for synthesis of 2-arylchromeno[3,4-b]pyrrol-4(3H)-ones: a case of nitro group directed reductive coupling
Source: Royal Society of Chemistry journal article supplement (doi:10.1039/d3ob00917c), 2023-01-01
Supplement: d3ob00917c1.pdf [file d3ob00917c1.pdf]

## 4-Chloro-3-nitrocoumarin as a Precursor for Synthesis of 2-Arylchromeno[3,4-*b*]pyrrol-4(3*H*)-ones: A case of Nitro Group Directed Reductive Coupling

Balasubrahmanya K. Sathyanarayana,<sup>a</sup> Kiran B. Manjappa,<sup>a\*</sup> and Ding-Yah Yang<sup>a,b\*</sup>

<sup>a</sup>*Graduate Program for Biomedical and Materials Science, Tunghai University*

<sup>b</sup>*Department of Chemistry, Tunghai University,*

*No. 1727, Sec. 4, Taiwan Boulevard, Xitun District, Taichung 407224, Taiwan*

*\*Corresponding author: Email: [kiran@thu.edu.tw](mailto:kiran@thu.edu.tw); [yang@thu.edu.tw](mailto:yang@thu.edu.tw)*

### Supporting Information

#### Table of Contents

|   |                                                                                        |         |
|---|----------------------------------------------------------------------------------------|---------|
| 1 | Instrumentation.....                                                                   | S2      |
| 2 | Characterization data of the prepared compounds .....                                  | S2–S8   |
| 3 | References .....                                                                       | S8      |
| 4 | X-ray analysis of <b>5a</b> , <b>7</b> , <b>13</b> , and <b>18a</b> .....              | S9–S16  |
| 5 | Copies of <sup>1</sup> H and <sup>13</sup> C NMR spectra of synthesized compounds..... | S17–S72 |

## 1. Instrumentation

Melting points were determined on a Mel-Temp melting point apparatus in open capillaries and are uncorrected. MS were performed on JEOL JMS-SX/SX 102A spectrometer. IR spectra were obtained using a 1725XFT-IR spectrophotometer. Single crystal structures were determined by a Bruker AXS SMART-1000 X-ray single-crystal diffractometer.  $^1\text{H}$  and  $^{13}\text{C}$  NMR spectra were recorded at 400 and 150 MHz on a Bruker 400/600 spectrometer. Chemical shifts were reported in parts per million on the  $\delta$  scale relative to an internal standard (tetramethylsilane, or appropriate solvent peaks) with coupling constants given in hertz.  $^1\text{H}$  NMR multiplicity data are denoted by s (singlet), d (doublet), t (triplet), q (quartet), and m (multiplet). Analytical thin-layer chromatography (TLC) was carried out on Merck silica gel 60G-254 plates (25 mm) and developed with the solvents mentioned. Flash chromatography was performed in columns of various diameters with Merck silica gel (230-400 mesh ASTM 9385 kieselgel 60H) by elution with the solvent systems.

## 2. Characterization data of prepared compounds

**5a.** 3-nitro-4-(2-oxo-2-phenylethyl)-2H-chromen-2-one. Pale yellow solid; yield 42%;  $R_f$  = 0.42 (30% EtOAc/hexanes); mp 182–184 °C;  $^1\text{H}$  NMR ( $\text{CDCl}_3$ , 400 MHz)  $\delta$  8.03 (d,  $J$  = 7.2 Hz, 2H), 7.70 (t,  $J$  = 7.6 Hz, 2H), 7.57 (t,  $J$  = 8.0 Hz, 2H), 7.51 (d,  $J$  = 7.2 Hz, 1H), 7.46 (d,  $J$  = 8.0 Hz, 1H), 7.37 (t,  $J$  = 7.2 Hz, 1H), 4.63 (s, 2H);  $^{13}\text{C}$  NMR ( $\text{CDCl}_3$ , 150 MHz)  $\delta$  191.7, 152.8, 152.5, 143.2, 138.3, 135.2, 134.5, 134.3, 129.1, 128.4, 126.6, 125.7, 117.7, 117.5, 37.8; IR  $\nu_{\text{max}}$  (KBr) 3233, 2426, 1715, 1683, 1607, 1566, 1379, 1215, 1072, 763  $\text{cm}^{-1}$ ; HRMS (EI) calcd for  $\text{C}_{17}\text{H}_{11}\text{NO}_5$  [ $\text{M}^+$ ] 309.0637, found 309.0634.

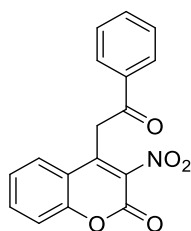

**5b.** 4-(2-(4-bromophenyl)-2-oxoethyl)-3-nitro-2H-chromen-2-one. White solid; yield 40%;  $R_f$  = 0.40 (30% EtOAc/hexanes); mp 220–222 °C;  $^1\text{H}$  NMR ( $\text{CDCl}_3$ , 400 MHz)  $\delta$  7.88 (d,  $J$  = 8.0 Hz, 2H), 7.72–7.67 (m, 3H), 7.48 (tt,  $J$  = 9.2, 8.0 Hz, 2H), 7.38 (t,  $J$  = 7.6 Hz, 1H), 4.58 (s, 2H);  $^{13}\text{C}$  NMR ( $\text{DMSO}-d_6$ , 150 MHz)  $\delta$  192.9, 152.9, 151.9, 145.3, 137.3, 134.8, 134.3, 131.9, 130.6, 128.4, 128.3, 125.7, 117.6, 117.1, 38.1; IR  $\nu_{\text{max}}$  (KBr) 3413, 2273, 1712, 1683, 1565, 1530, 1452, 1314, 984, 763  $\text{cm}^{-1}$ ; HRMS (EI) calcd for  $\text{C}_{17}\text{H}_{10}\text{BrNO}_5$  [ $\text{M}^+$ ] 386.9742, found 386.9751.

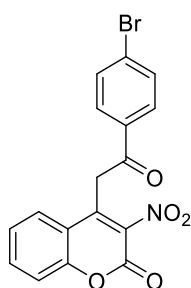

**5c.** 3-nitro-4-(2-oxo-2-(4-(trifluoromethyl)phenyl)ethyl)-2H-chromen-2-one. Pale yellow solid; yield 47%;  $R_f$  = 0.40 (30% EtOAc/hexanes); mp 212–214 °C;  $^1\text{H}$  NMR ( $\text{CDCl}_3$ , 400 MHz)  $\delta$  8.14 (d,  $J$  = 8.0 Hz, 2H), 7.84 (d,  $J$  = 8.4 Hz, 2H), 7.72 (t,  $J$  = 8.8 Hz, 1H), 7.49 (t,  $J$  = 7.2 Hz, 2H), 7.40 (t,  $J$  = 8.0 Hz, 1H), 4.63 (s, 2H);  $^{13}\text{C}$  NMR ( $\text{CDCl}_3$ , 150 MHz)  $\delta$  191.0, 152.7, 152.6, 142.4, 138.3, 137.9, 135.8 (q,  $^2J_{\text{CF}}$  = 33.0 Hz), 134.5, 128.8, 126.5, 126.2 (d,  $^3J_{\text{CF}}$  = 3.0 Hz), 123.3 (q,  $^1J_{\text{CF}}$  = 270.0

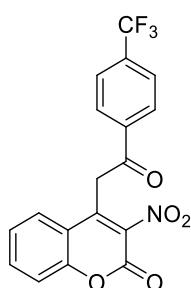

Hz), 117.9, 117.4, 38.0; IR  $\nu_{max}$  (KBr) 3444, 2272, 1736, 1684, 1610, 1540, 1316, 1128, 831, 757  $\text{cm}^{-1}$ ; HRMS (EI) calcd for  $\text{C}_{18}\text{H}_{10}\text{F}_3\text{NO}_5$  [ $\text{M}^+$ ] 377.0511, found 377.0520.

**5d.** 4-(2-(3-nitro-2-oxo-2*H*-chromen-4-yl)acetyl)benzonitrile. Light yellow solid; yield 48%;  $R_f$  = 0.38 (40% EtOAc/hexanes); mp 200–202 °C;  $^1\text{H}$  NMR ( $\text{CDCl}_3$ , 400 MHz)  $\delta$  8.12 (d,  $J$  = 8.0 Hz, 2H), 7.87 (d,  $J$  = 8.0 Hz, 2H), 7.73 (t,  $J$  = 7.6 Hz, 1H), 7.49 (t,  $J$  = 7.2 Hz, 2H), 7.40 (t,  $J$  = 8.0 Hz, 1H), 4.62 (s, 2H);  $^{13}\text{C}$  NMR ( $\text{CDCl}_3$ , 150 MHz)  $\delta$  190.7, 152.7, 152.5, 142.2, 138.1, 134.6, 133.0, 132.6, 128.8, 126.4, 125.8, 117.9, 117.4, 117.3, 37.9; IR  $\nu_{max}$  (KBr) 2975, 2232, 1726, 1694, 1607, 1532, 1370, 1213, 985, 765  $\text{cm}^{-1}$ ; HRMS (EI) calcd for  $\text{C}_{18}\text{H}_{10}\text{N}_2\text{O}_5$  [ $\text{M}^+$ ] 334.0590, found 334.0594.

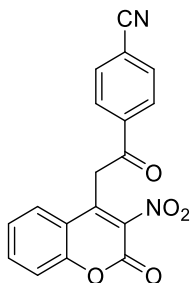

**5e.** 3-nitro-4-(2-oxo-2-(*o*-tolyl)ethyl)-2*H*-chromen-2-one. White solid; yield 49%;  $R_f$  = 0.42 (30% EtOAc/hexanes); mp 164–166 °C;  $^1\text{H}$  NMR ( $\text{CDCl}_3$ , 400 MHz)  $\delta$  7.82 (d,  $J$  = 7.6 Hz, 1H), 7.71 (t,  $J$  = 7.2 Hz, 1H), 7.56 (d,  $J$  = 7.2 Hz, 1H), 7.52–7.45 (m, 2H), 7.42–7.38 (m, 2H), 7.36–7.33 (m, 1H), 4.57 (s, 2H), 2.51 (s, 3H);  $^{13}\text{C}$  NMR ( $\text{CDCl}_3$ , 150 MHz)  $\delta$  194.6, 152.8, 152.6, 143.3, 139.9, 134.3, 132.9, 132.7, 128.8, 126.6, 126.2, 125.7, 117.8, 117.6, 40.2, 21.6; IR  $\nu_{max}$  (KBr) 3438, 2273, 1728, 1606, 1533, 1450, 1288, 986, 774, 659  $\text{cm}^{-1}$ ; HRMS (EI) calcd for  $\text{C}_{18}\text{H}_{13}\text{NO}_5$  [ $\text{M}^+$ ] 323.0794, found 323.0800.

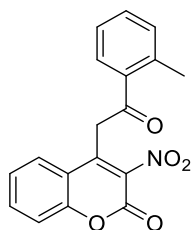

**5f.** 4-(2-(2-bromophenyl)-2-oxoethyl)-3-nitro-2*H*-chromen-2-one. Off-white solid; yield 52%;  $R_f$  = 0.45 (30% EtOAc/hexanes); mp 142–144 °C;  $^1\text{H}$  NMR ( $\text{CDCl}_3$ , 400 MHz)  $\delta$  7.73 (t,  $J$  = 8.0 Hz, 2H), 7.69 (d,  $J$  = 8.0 Hz, 1H), 7.55 (dd,  $J$  = 7.6, 1.6 Hz, 1H), 7.49–7.47 (m, 1H), 7.46–7.45 (m, 1H), 7.43–7.39 (m, 2H), 4.62 (s, 2H);  $^{13}\text{C}$  NMR ( $\text{CDCl}_3$ , 150 MHz)  $\delta$  195.3, 152.7, 152.6, 142.4, 134.5, 133.9, 132.9, 129.2, 128.0, 127.0, 125.8, 118.6, 117.7, 117.4, 41.7; IR  $\nu_{max}$  (KBr) 3454, 2971, 1732, 1709, 1532, 1371, 1212, 1054, 976, 754  $\text{cm}^{-1}$ ; HRMS (EI) calcd for  $\text{C}_{17}\text{H}_{10}\text{BrNO}_5$  [ $\text{M}^+$ ] 386.9742, found 386.9749.

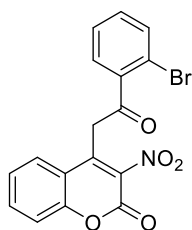

**5g.** 4-(2-(naphthalen-1-yl)-2-oxoethyl)-3-nitro-2*H*-chromen-2-one. Pale yellow solid; yield 46%;  $R_f$  = 0.43 (30% EtOAc/hexanes); mp 200–202 °C;  $^1\text{H}$  NMR ( $\text{CDCl}_3$ , 400 MHz)  $\delta$  8.57 (s, 1H), 8.03 (t,  $J$  = 8.4 Hz, 2H), 7.97 (d,  $J$  = 8.8 Hz, 1H), 7.93 (d,  $J$  = 8.0 Hz, 1H), 7.71–7.67 (m, 2H), 7.63 (t,  $J$  = 7.2 Hz, 1H), 7.57 (d,  $J$  = 8.0 Hz, 1H), 7.47 (d,  $J$  = 8.0 Hz, 1H), 7.37 (t,  $J$  = 8.0 Hz, 1H), 4.77 (s, 2H);  $^{13}\text{C}$  NMR ( $\text{DMSO}-d_6$ , 150 MHz)  $\delta$  193.5, 152.9, 151.9, 145.5, 137.4, 135.4, 134.7, 132.6, 132.1, 131.2, 129.7, 129.1, 128.4, 128.3, 127.7, 127.2, 125.7, 123.5, 117.6, 117.1, 38.2;

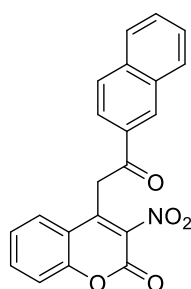

IR  $\nu_{max}$  (KBr) 3439, 3036, 2106, 1675, 1609, 1527, 1451, 1309, 820, 761  $\text{cm}^{-1}$ ;  
HRMS (EI) calcd for  $\text{C}_{21}\text{H}_{13}\text{NO}_5$  [ $\text{M}^+$ ] 359.0794, found 359.0802.

**5h.** 4-(2-(furan-2-yl)-2-oxoethyl)-3-nitro-2H-chromen-2-one. White solid; yield 47%;  $R_f = 0.37$

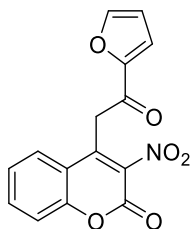

(40% EtOAc/hexanes); mp 176–178  $^{\circ}\text{C}$ ;  $^1\text{H}$  NMR ( $\text{CDCl}_3$ , 400 MHz)  $\delta$  7.70 (t,  $J = 8.8$  Hz, 2H), 7.64 (d,  $J = 8.0$  Hz, 1H), 7.45 (d,  $J = 8.4$  Hz, 1H), 7.40 (d,  $J = 8.0$  Hz, 1H), 7.36 (d,  $J = 7.6$  Hz, 1H), 6.68–6.63 (m, 1H), 4.51 (s, 2H);  $^{13}\text{C}$  NMR ( $\text{CDCl}_3$ , 150 MHz)  $\delta$  180.5, 152.8, 152.6, 151.3, 147.4, 141.9, 138.5, 134.3, 127.0, 125.7, 118.7, 117.7, 117.5, 113.2, 37.5; IR  $\nu_{max}$  (KBr) 3447, 2273, 1812, 1731, 1675, 1567, 1377, 1022, 766, 674  $\text{cm}^{-1}$ ; HRMS (EI) calcd for  $\text{C}_{15}\text{H}_9\text{NO}_6$  [ $\text{M}^+$ ] 299.0430, found 299.0424.

**5i.** 3-nitro-4-(2-oxo-2-(thiophen-2-yl)ethyl)-2H-chromen-2-one. White solid; yield 50%;  $R_f = 0.42$

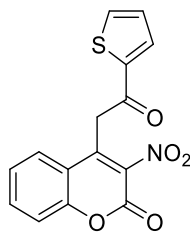

(30% EtOAc/hexanes); mp 182–184  $^{\circ}\text{C}$ ;  $^1\text{H}$  NMR ( $\text{CDCl}_3$ , 400 MHz)  $\delta$  7.88 (d,  $J = 7.6$  Hz, 1H), 7.80 (d,  $J = 4.4$  Hz, 1H), 7.70 (t,  $J = 7.6$  Hz, 1H), 7.61 (d,  $J = 7.6$  Hz, 1H), 7.46 (d,  $J = 8.0$  Hz, 1H), 7.39 (t,  $J = 8.0$  Hz, 1H), 7.25 (t,  $J = 7.2$  Hz, 1H), 4.56 (s, 2H);  $^{13}\text{C}$  NMR ( $\text{CDCl}_3$ , 150 MHz)  $\delta$  184.2, 152.8, 152.5, 142.2, 141.9, 138.3, 135.7, 134.4, 133.2, 128.7, 126.8, 125.7, 117.7, 117.4, 38.1; IR  $\nu_{max}$  (KBr) 3438, 2273, 1664, 1529, 1413, 1356, 1224, 1063, 928, 728  $\text{cm}^{-1}$ ; HRMS (EI) calcd for  $\text{C}_{15}\text{H}_9\text{NO}_5\text{S}$  [ $\text{M}^+$ ] 315.0201, found 315.0206.

**5j.** 6-chloro-3-nitro-4-(2-oxo-2-phenylethyl)-2H-chromen-2-one. Light grey solid; yield 49%;  $R_f =$

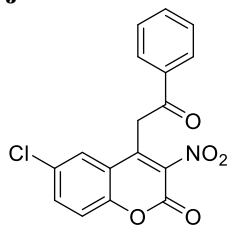

0.45 (30% EtOAc/hexanes); mp 210–212  $^{\circ}\text{C}$ ;  $^1\text{H}$  NMR ( $\text{CDCl}_3$ , 400 MHz)  $\delta$  8.02 (d,  $J = 7.6$  Hz, 2H), 7.71 (t,  $J = 7.2$  Hz, 1H), 7.64 (dd,  $J = 8.8, 2.4$  Hz, 1H), 7.58 (t,  $J = 7.6$  Hz, 2H), 7.46 (d,  $J = 2.0$  Hz, 1H), 7.42 (d,  $J = 8.8$  Hz, 1H), 4.58 (s, 2H);  $^{13}\text{C}$  NMR ( $\text{DMSO}-d_6$ , 150 MHz)  $\delta$  194.6, 153.5, 151.2, 145.7, 138.3, 135.7, 135.24, 135.20, 130.9, 129.8, 129.3, 127.9, 119.8, 38.9; IR  $\nu_{max}$  (KBr) 3438, 2273, 1664, 1529, 1413, 1356, 1224, 1063, 928, 728  $\text{cm}^{-1}$ ; HRMS (EI) calcd for  $\text{C}_{17}\text{H}_{10}\text{ClNO}_5$  [ $\text{M}^+$ ] 343.0248, found 343.0242.

**5k.** 6-chloro-3-nitro-4-(2-oxo-2-(thiophen-2-yl)ethyl)-2H-chromen-2-one. White solid; yield 59%;

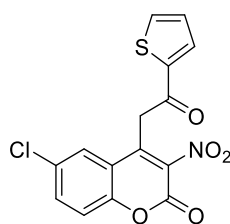

$R_f = 0.49$  (40% EtOAc/hexanes); mp 186–188  $^{\circ}\text{C}$ ;  $^1\text{H}$  NMR ( $\text{CDCl}_3$ , 400 MHz)  $\delta$  7.87 (d,  $J = 3.6$  Hz, 1H), 7.82 (d,  $J = 4.2$  Hz, 1H), 7.65 (dd,  $J = 8.8, 2.2$  Hz, 1H), 7.56 (d,  $J = 2.0$  Hz, 1H), 7.41 (d,  $J = 8.8$  Hz, 1H), 7.25 (d,  $J = 8.8$  Hz, 1H), 4.51 (s, 2H);  $^{13}\text{C}$  NMR (Acetone- $d_6$ , 150 MHz)  $\delta$  186.4, 153.4, 152.0, 143.7, 143.3, 139.5, 136.5, 135.3, 135.0, 131.3, 129.6, 128.1, 120.4, 119.9, 38.8; IR  $\nu_{max}$  (KBr) 3438, 2273, 1664, 1529, 1413, 1356, 1224, 1063, 928, 728  $\text{cm}^{-1}$ ; HRMS (EI) calcd for  $\text{C}_{15}\text{H}_8\text{ClNO}_5\text{S}$  [ $\text{M}^+$ ] 348.9812, found 348.9806.

**5l.** 7,8,11,12-tetrahydro-6*H*,10*H*-pyrido[3,2,1-*ij*]3-nitro-4-(2'-oxo-2'-phenylethyl)-2*H*-chromen-2-one. Orange solid; yield 55%;  $R_f = 0.55$  (50% EtOAc/hexanes); mp 212–214 °C;  $^1\text{H NMR}$  ( $\text{CDCl}_3$ , 400 MHz)  $\delta$  8.03 (d,  $J = 8.4$  Hz, 2H), 7.66 (t,  $J = 7.2$  Hz, 1H), 7.54 (t,  $J = 7.6$  Hz, 2H), 6.90 (s, 1H), 4.59 (s, 2H), 3.34 (t,  $J = 5.2$  Hz, 4H), 2.90–2.89 (m, 2H), 2.71 (t,  $J = 6.0$  Hz, 2H), 1.99–1.93 (m, 4H);  $^{13}\text{C NMR}$  ( $\text{CDCl}_3$ , 150 MHz)  $\delta$  193.1, 154.7, 151.1, 148.8, 145.8, 135.9, 134.4, 134.1, 129.6, 129.1, 128.5, 124.2, 120.5, 106.5, 50.3, 49.9, 38.2, 29.8, 27.8, 20.3, 20.2; IR  $\nu_{\text{max}}$  (KBr) 3224, 3148, 1726, 1683, 1518, 1285, 1210, 1174, 1082, 974  $\text{cm}^{-1}$ ; HRMS (EI) calcd for  $\text{C}_{23}\text{H}_{20}\text{N}_2\text{O}_5$  [ $\text{M}^+$ ] 404.1372, found 404.1381.

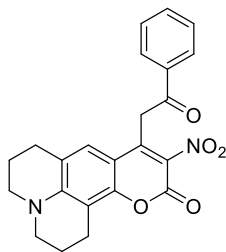

**7l.** White solid; yield 55%;  $R_f = 0.48$  (30%) EtOAc/hexanes); mp 154–156 °C (lit. 120–122 °C);  $^1\text{H NMR}$  ( $\text{CDCl}_3$ , 400 MHz)  $\delta$  7.90 (d,  $J = 7.2$  Hz, 2H), 7.56 (t,  $J = 7.6$  Hz, 1H), 7.43 (t,  $J = 7.6$  Hz, 2H), 7.34 (dd,  $J = 2.4, 6.0$  Hz, 2H), 7.22–7.20 (m, 3H), 4.62 (s, 1H), 3.92 (ABq,  $J = 11.2$  Hz, 1H each).

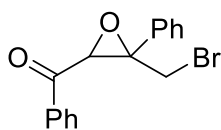

**13.** (*Z*)-(2-amino-4-(nitromethylene)-4*H*-chromen-3-yl)(phenyl)methanone. Orange solid; yield; 70%;  $R_f = 0.45$  (30% EtOAc/hexanes); mp 178–180 °C;  $^1\text{H NMR}$  ( $\text{CDCl}_3$ , 400 MHz)  $\delta$  7.69 (dd,  $J = 8.4, 1.2$  Hz, 1H), 7.61–7.56 (m, 3H), 7.43–7.38 (m, 2H), 7.35 (d,  $J = 7.6$  Hz, 2H), 7.31 (d,  $J = 7.2$  Hz, 1H), 7.16 (s, 1H);  $^{13}\text{C NMR}$  ( $\text{DMSO-}d_6$ , 150 MHz)  $\delta$  191.8, 162.1, 149.2, 139.2, 139.1, 132.3, 131.2, 128.0, 127.8, 125.9, 124.2, 120.9, 119.2, 116.9, 88.2.; IR  $\nu_{\text{max}}$  (KBr) 3438, 2273, 1664, 1529, 1413, 1356, 1224, 1063, 928, 728  $\text{cm}^{-1}$ ; HRMS (EI) calcd for  $\text{C}_{17}\text{H}_{12}\text{N}_2\text{O}_4$  [ $\text{M}^+$ ] 308.0797, found 308.0804.

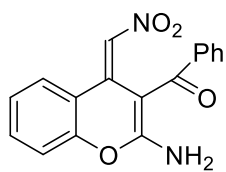

**18a<sup>2,3</sup>.** 2-phenylchromeno[3,4-*b*]pyrrol-4(3*H*)-one. White solid; yield 96%;  $R_f = 0.42$  (20% EtOAc/hexanes); mp 182–184 °C;  $^1\text{H NMR}$  ( $\text{DMSO-}d_6$ , 400 MHz)  $\delta$  12.94 (s, 1H), 7.97 (d,  $J = 7.6$  Hz, 3H), 7.46 (t,  $J = 7.6$  Hz, 2H), 7.40–7.34 (m, 5H).

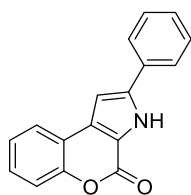

**18b.** 2-(4-bromophenyl)chromeno[3,4-*b*]pyrrol-4(3*H*)-one. White solid; yield 88%;  $R_f = 0.40$  (20% EtOAc/hexanes); mp 220–224 °C;  $^1\text{H NMR}$  ( $\text{DMSO-}d_6$ , 400 MHz)  $\delta$  13.05 (s, 1H), 7.98 (d,  $J = 7.6$  Hz, 1H), 7.95 (d,  $J = 8.4$  Hz, 2H), 7.70 (d,  $J = 8.4$  Hz, 2H), 7.47 (d,  $J = 8.4$  Hz, 2H), 7.44 (s, 1H), 7.39–7.37 (m, 1H);  $^{13}\text{C NMR}$  ( $\text{DMSO-}d_6$ , 150 MHz)  $\delta$  155.2, 151.5, 142.2, 137.9, 132.8, 130.1, 129.2, 128.5, 125.5, 124.3, 122.8, 120.3, 117.9, 117.5, 102.0; IR  $\nu_{\text{max}}$  (KBr) 3240, 3093, 2807, 1738, 1433, 1288, 1179, 1113, 816, 729  $\text{cm}^{-1}$ ; HRMS (EI) calcd for  $\text{C}_{17}\text{H}_{10}\text{BrNO}_2$  [ $\text{M}^+$ ] 338.9895, found 338.9893.

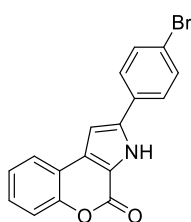

**18c.** 2-(4-(trifluoromethyl)phenyl)chromeno[3,4-*b*]pyrrol-4(3*H*)-one. White solid; yield 95%;  $R_f = 0.43$  (40% EtOAc/hexanes); mp 212–214 °C;  $^1\text{H NMR}$  (DMSO-*d*<sub>6</sub>, 400 MHz)  $\delta$  13.22 (s, 1H), 8.22–8.18 (m, 2H), 8.00–7.97 (m, 1H), 7.87–7.82 (m, 2H), 7.60–7.57 (m, 1H), 7.46–7.38 (m, 3H);  $^{13}\text{C NMR}$  (DMSO-*d*<sub>6</sub>, 150 MHz)  $\delta$  154.2, 151.0, 140.5, 134.5, 130.0, 128.6 (q,  $^2J_{\text{CF}} = 33.0$  Hz) 128.4, 126.5, 126.0 (d,  $^3J_{\text{CF}} = 3.0$  Hz), 124.8 (q,  $^1J_{\text{CF}} = 189.0$  Hz), 124.6, 123.7, 123.4, 118.2, 117.5, 117.0; IR  $\nu_{\text{max}}$  (KBr) 3463, 2979, 1738, 1673, 1538, 1375, 1219, 1040, 882, 760  $\text{cm}^{-1}$ ; HRMS (EI) calcd for  $\text{C}_{18}\text{H}_{10}\text{F}_3\text{NO}_2$  [ $\text{M}^+$ ] 329.0664, found 329.0659.

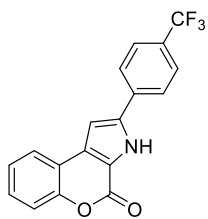

**18d.** 2-(4-(aminomethyl)phenyl)chromeno[3,4-*b*]pyrrol-4(3*H*)-one. White solid; yield 90%;  $R_f = 0.38$  (50% EtOAc/hexanes); mp 200–202 °C;  $^1\text{H NMR}$  (DMSO-*d*<sub>6</sub>, 400 MHz)  $\delta$  12.94 (s, 1H), 8.00 (d,  $J = 7.6$  Hz, 1H), 7.96 (d,  $J = 8.4$  Hz, 2H), 7.43–7.41 (m, 6H), 7.39–7.35 (m, 1H), 5.26 (t,  $J = 7.6$  Hz, 1H), 4.55 (d,  $J = 5.2$  Hz, 2H);  $^{13}\text{C NMR}$  (DMSO-*d*<sub>6</sub>, 150 MHz)  $\delta$  155.0, 151.5, 143.5, 143.4, 130.9, 129.6, 129.0, 127.9, 126.4, 125.3, 124.3, 118.0, 117.8, 117.47, 117.45, 101.3, 63.3; IR  $\nu_{\text{max}}$  (KBr) 3213, 3147, 1699, 1483, 1286, 1114, 1084, 976, 745, 733  $\text{cm}^{-1}$ ; HRMS (EI) calcd for  $\text{C}_{18}\text{H}_{14}\text{N}_2\text{O}_2$  [ $\text{M}^+$ ] 290.1055, found 290.200.

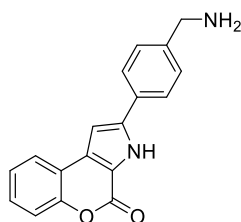

**18e.**<sup>2</sup> 2-(2-tolyl)chromeno[3,4-*b*]pyrrol-4(3*H*)-one. Grey solid; yield 95%;  $R_f = 0.42$  (20% EtOAc/hexanes); mp 164–166 °C;  $^1\text{H NMR}$  ( $\text{CDCl}_3$ , 400 MHz)  $\delta$  9.57 (s, 1H), 7.83 (d,  $J = 7.6$  Hz, 1H), 7.49–7.39 (m, 3H), 7.35–7.31 (m, 4H), 6.82 (s, 1H), 2.52 (s, 3H).

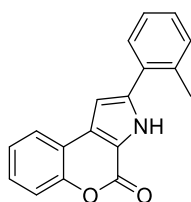

**18f.** 2-(2-bromophenyl)chromeno[3,4-*b*]pyrrol-4(3*H*)-one. White solid; yield 92%;  $R_f = 0.45$  (30% EtOAc/hexanes); mp 142–144 °C;  $^1\text{H NMR}$  ( $\text{CDCl}_3$ , 400 MHz)  $\delta$  9.95 (s, 1H), 7.83 (d,  $J = 7.6$  Hz, 1H), 7.73 (d,  $J = 8.0$  Hz, 1H), 7.62 (d,  $J = 7.6$  Hz, 1H), 7.46–7.40 (m, 3H), 7.35–7.28 (m, 2H), 7.03 (d,  $J = 2.4$  Hz, 1H);  $^{13}\text{C NMR}$  (DMSO-*d*<sub>6</sub>, 150 MHz)  $\delta$  155.1, 151.4, 141.9, 134.1, 132.7, 132.4, 131.5, 129.9, 129.0, 128.7, 125.4, 124.3, 122.4, 117.9, 117.4, 117.1, 104.9; IR  $\nu_{\text{max}}$  (KBr) 3226, 3116, 1699, 1569, 1483, 1284, 1174, 1083, 975, 738.3  $\text{cm}^{-1}$ ; HRMS (EI) calcd for  $\text{C}_{17}\text{H}_{10}\text{BrNO}_2$  [ $\text{M}^+$ ] 338.9895, found 338.9897.

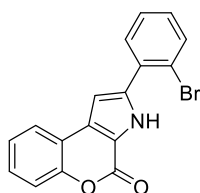

**18g.** 2-(naphthalen-2-yl)chromeno[3,4-*b*]pyrrol-4(3*H*)-one. Off yellow solid; yield 81%;  $R_f=0.42$  (30% EtOAc/hexanes); mp 200–202 °C;  $^1\text{H NMR}$  (DMSO- $d_6$ , 400 MHz)  $\delta$  13.13 (s, 1H), 8.62 (s, 1H), 8.13 (d,  $J = 7.6$  Hz, 1H), 8.03 (d,  $J = 7.6$  Hz, 2H), 7.95 (d,  $J = 6.4$  Hz, 2H), 7.59 (brs, 3H), 7.45–7.40 (m, 3H);  $^{13}\text{C NMR}$  (DMSO- $d_6$ , 150 MHz)  $\delta$  154.0, 150.9, 142.2, 133.0, 132.7, 129.9, 128.5, 128.2, 128.04, 127.96, 127.7, 126.9, 126.7, 124.6, 124.4, 123.8, 123.5, 117.5, 117.4, 116.8, 101.5; IR  $\nu_{\text{max}}$  (KBr) 3275, 3052, 2882, 1703, 1605, 1499, 1272, 1180, 796  $\text{cm}^{-1}$ ; HRMS (EI) calcd for  $\text{C}_{21}\text{H}_{13}\text{NO}_2$  [ $\text{M}^+$ ] 311.0946, found 311.0938.

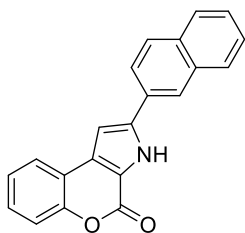

**18h.** 2-(furan-2-yl)chromeno[3,4-*b*]pyrrol-4(3*H*)-one. White solid; yield 88%;  $R_f = 0.37$  (20% EtOAc/hexanes); mp 176–178 °C;  $^1\text{H NMR}$  (DMSO- $d_6$ , 400 MHz)  $\delta$  13.06 (s, 1H), 8.03 (d,  $J = 7.2$  Hz, 1H), 7.84 (s, 1H), 7.43–7.35 (m, 3H), 7.17 (d,  $J = 12.0$  Hz, 2H), 6.67 (s, 1H);  $^{13}\text{C NMR}$  (DMSO- $d_6$ , 150 MHz)  $\delta$  154.0, 150.9, 146.1, 143.7, 133.5, 129.7, 128.1, 124.3, 123.7, 117.4, 116.7, 112.1, 108.1, 99.6; IR  $\nu_{\text{max}}$  (KBr) 309, 3146, 1698, 1508, 1286, 1113, 1080, 977, 803, 740  $\text{cm}^{-1}$ ; HRMS (EI) calcd for  $\text{C}_{15}\text{H}_9\text{NO}_3$  [ $\text{M}^+$ ] 251.0582, found 251.0586.

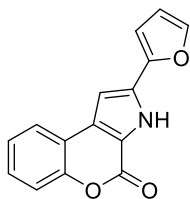

**18i.** 2-(thiophen-2-yl)chromeno[3,4-*b*]pyrrol-4(3*H*)-one. White solid; yield 91%;  $R_f = 0.43$  (30% EtOAc/hexanes); mp 182–184 °C;  $^1\text{H NMR}$  (DMSO- $d_6$ , 400 MHz)  $\delta$  13.09 (s, 1H), 8.03 (d,  $J = 7.6$  Hz, 1H), 7.80 (d,  $J = 3.2$  Hz, 1H), 7.65 (d,  $J = 4.8$  Hz, 1H), 7.47–7.42 (m, 2H), 7.38–7.35 (m, 1H), 7.19–7.17 (m, 2H);  $^{13}\text{C NMR}$  (DMSO- $d_6$ , 150 MHz)  $\delta$  153.8, 150.9, 136.6, 133.4, 129.9, 128.3, 128.0, 126.9, 125.6, 124.3, 123.7, 117.3, 116.7, 100.9; IR  $\nu_{\text{max}}$  (KBr) 3225, 3116, 1695, 1482, 1282, 1174, 1082, 973, 735  $\text{cm}^{-1}$ ; HRMS (EI) calcd for  $\text{C}_{15}\text{H}_9\text{NO}_2\text{S}$  [ $\text{M}^+$ ] 267.0354, found 267.0348.

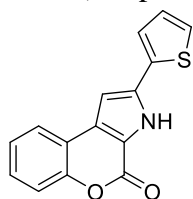

**18j.** 8-chloro-2-phenylchromeno[3,4-*b*]pyrrol-4(3*H*)-one. White solid; yield 94%;  $R_f = 0.43$  (30% EtOAc/hexanes); mp 182–184 °C;  $^1\text{H NMR}$  (DMSO- $d_6$ , 400 MHz)  $\delta$  13.09 (s, 1H), 8.12 (d,  $J = 7.6$  Hz, 1H), 7.97 (d,  $J = 7.2$  Hz, 2H), 7.51–7.46 (m, 5H), 7.41 (d,  $J = 7.2$  Hz, 1H);  $^{13}\text{C NMR}$  (DMSO- $d_6$ , 150 MHz)  $\delta$  153.5, 149.5, 142.4, 130.4, 129.0, 128.8, 128.7, 128.3, 127.6, 125.8, 122.9, 119.1, 118.6, 117.3, 101.4; IR  $\nu_{\text{max}}$  (KBr) 3248, 3109, 1738, 1672, 1537, 1375, 1218, 1040, 760, 691  $\text{cm}^{-1}$ ; HRMS (EI) calcd for  $\text{C}_{17}\text{H}_{10}\text{ClNO}_2$  [ $\text{M}^+$ ] 295.0400, found 295.0392.

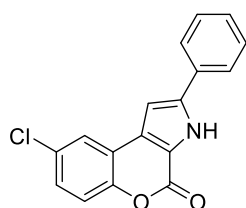

**18k.** 8-chloro-2-(thiophen-2-yl)chromeno[3,4-*b*]pyrrol-4(3*H*)-one. Light yellow; yield 86%;  $R_f = 0.35$  (40% EtOAc/hexanes); mp 230–232 °C;  $^1\text{H NMR}$  (Acetone- $d_6$ , 400 MHz),  $\delta$  12.08 (bs, 1H), 8.05 (s, 1H), 7.75–7.73 (m, 1H), 7.55 (d,  $J = 4.0$  Hz, 1H), 7.43–7.38 (m, 2H), 7.43–7.38 (m, 2H);  $^{13}\text{C NMR}$  (Acetone- $d_6$ , 150 MHz)  $\delta$  154.2, 151.0, 137.7, 134.3, 130.0, 129.8, 129.1, 128.6, 127.5, 126.3, 123.9, 120.2, 119.4, 118.3, 101.9; IR  $\nu_{\text{max}}$  (KBr) 3275, 3052, 1703, 1605, 1272, 1180, 1088, 1033, 898, 797  $\text{cm}^{-1}$ ; HRMS (EI) calcd for  $\text{C}_{15}\text{H}_8\text{ClNO}_2\text{S}$  [ $\text{M}^+$ ] 300.9964, found 300.9961.

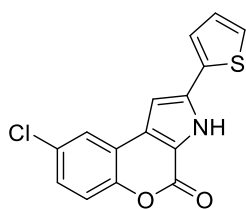

**18l.** 7,8,11,12-tetrahydro-6*H*,10*H*-pyrido[3,2,1-*ij*]-2'-phenylchromeno[3',4'-*b*]pyrrol-4'(3'*H*)-one. Grey solid; yield 95%;  $R_f = 0.43$  (30% EtOAc/hexanes); mp 200–202 °C;  $^1\text{H NMR}$  (DMSO- $d_6$ , 400 MHz)  $\delta$  12.57 (s, 1H), 7.95 (d,  $J = 7.6$  Hz, 2H), 7.46 (t,  $J = 7.6$  Hz, 2H), 7.37 (d,  $J = 8.0$  Hz, 1H), 7.33 (s,  $J = 8.0$  Hz, 1H), 7.16 (s, 1H), 3.17 (d,  $J = 4.4$  Hz, 4H), 2.79 (d,  $J = 4.4$  Hz, 4H), 1.92–1.92 (brs, 4H);  $^{13}\text{C NMR}$  (Acetone- $d_6$ , 150 MHz)  $\delta$  156.3, 150.4, 144.8, 143.6, 133.7, 132.9, 130.6, 130.0, 127.2, 122.1, 119.9, 117.5, 109.5, 107.7, 100.8, 51.3, 50.9, 29.0, 23.4, 22.7, 22.6; IR  $\nu_{\text{max}}$  (KBr) 3062, 2882, 2826, 1614, 1525, 1368, 1307, 1151, 953, 761  $\text{cm}^{-1}$ ; HRMS (EI) calcd for  $\text{C}_{23}\text{H}_{20}\text{N}_2\text{O}_2$  [ $\text{M}^+$ ] 356.1525, found 356.1528.

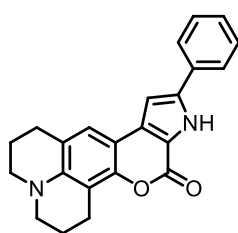

**20.** 3-phenethyl-2-phenylchromeno[3,4-*b*]pyrrol-4(3*H*)-one. White solid; yield 86%;  $R_f = 0.45$  (10% EtOAc/hexanes); mp 142–144 °C;  $^1\text{H NMR}$  ( $\text{CDCl}_3$ , 400 MHz)  $\delta$  7.77 (d,  $J = 7.6$  Hz, 1H), 7.44–7.41 (m, 4H), 7.38 (d,  $J = 8.0$  Hz, 1H), 7.29 (t,  $J = 8.0$  Hz, 1H), 7.25–7.22 (m, 2H), 7.16–7.15 (m, 3H), 6.93 (d,  $J = 2.8$  Hz, 2H), 6.62 (s, 1H), 4.65 (t,  $J = 7.6$  Hz, 2H), 3.01 (t,  $J = 7.6$  Hz, 2H);  $^{13}\text{C NMR}$  ( $\text{CDCl}_3$ , 150 MHz)  $\delta$  155.2, 151.5, 145.9, 137.9, 131.2, 130.4, 129.5, 129.02, 128.99, 128.7, 128.5, 128.0, 126.6, 124.2, 123.1, 117.9, 117.2, 116.5, 102.9, 47.6, 38.2; IR  $\nu_{\text{max}}$  (KBr) 3065, 1703, 1467, 1427, 1199, 1037, 1018, 954, 759, 695  $\text{cm}^{-1}$ ; HRMS (EI) calcd for  $\text{C}_{25}\text{H}_{19}\text{NO}_2$  [ $\text{M}^+$ ] 365.1416, found 365.1418.

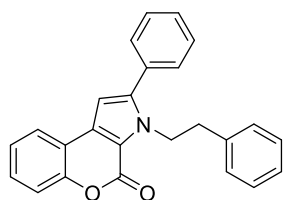

### 3. References

1. P. R. Huddleston and J. M. Barker, *Synth. Commun.* 1979, **9**, 171–178.
2. L. Chen and M. -H. Xu, *Adv. Synth. Catal.* 2009, **351**, 2005–2012.



#### 4.1 X-ray crystallographic analysis of 5a

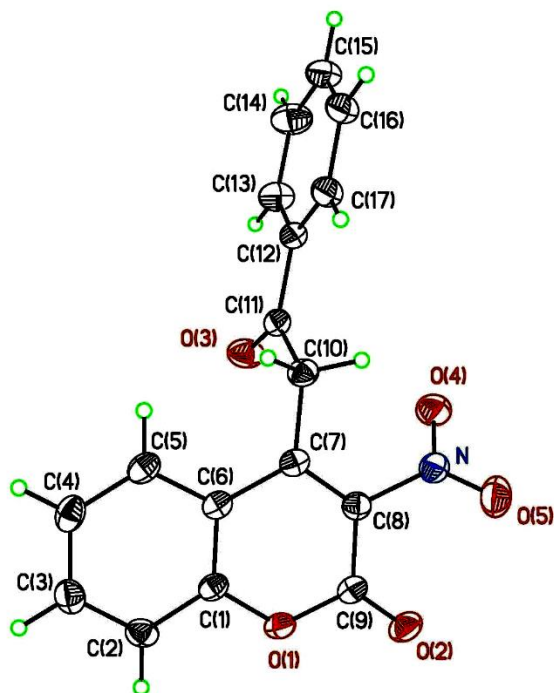

**Figure S1:** ORTEP diagram of compound **5a**. The ellipsoid contour probability levels: 50%.

**Table S1.** Crystal data and structure refinement for **5a**

|                                 |                                                  |                 |
|---------------------------------|--------------------------------------------------|-----------------|
| Identification code             | BSK020_1                                         |                 |
| Empirical formula               | C <sub>17</sub> H <sub>11</sub> N O <sub>5</sub> |                 |
| Formula weight                  | 309.27                                           |                 |
| Temperature                     | 150(2) K                                         |                 |
| Wavelength                      | 0.71073 Å                                        |                 |
| Crystal system                  | Monoclinic                                       |                 |
| Space group                     | P2 <sub>1</sub> /c                               |                 |
| Unit cell dimensions            | a = 14.3346(9) Å                                 | a = 90°.        |
|                                 | b = 12.1876(8) Å                                 | b = 92.995(3)°. |
|                                 | c = 7.9189(5) Å                                  | g = 90°.        |
| Volume                          | 1381.58(15) Å <sup>3</sup>                       |                 |
| Z                               | 4                                                |                 |
| Density (calculated)            | 1.487 Mg/m <sup>3</sup>                          |                 |
| Absorption coefficient          | 0.111 mm <sup>-1</sup>                           |                 |
| F(000)                          | 640                                              |                 |
| Crystal size                    | 0.480 x 0.290 x 0.070 mm <sup>3</sup>            |                 |
| Theta range for data collection | 3.071 to 27.971°.                                |                 |
| Index ranges                    | -18 ≤ h ≤ 18, -15 ≤ k ≤ 16, -9 ≤ l ≤ 10          |                 |
| Reflections collected           | 21696                                            |                 |
| Independent reflections         | 3314 [R(int) = 0.0380]                           |                 |
| Completeness to theta = 25.242° | 99.8 %                                           |                 |
| Absorption correction           | Semi-empirical from equivalents                  |                 |
| Max. and min. transmission      | 0.7456 and 0.6299                                |                 |
| Refinement method               | Full-matrix least-squares on F <sup>2</sup>      |                 |
| Data / restraints / parameters  | 3314 / 0 / 208                                   |                 |

|                                      |                                       |
|--------------------------------------|---------------------------------------|
| Goodness-of-fit on $F^2$             | 1.071                                 |
| Final R indices [ $I > 2\sigma(I)$ ] | R1 = 0.0452, wR2 = 0.1229             |
| R indices (all data)                 | R1 = 0.0605, wR2 = 0.1353             |
| Extinction coefficient               | n/a                                   |
| Largest diff. peak and hole          | 0.268 and -0.199 e. $\text{\AA}^{-3}$ |

## 4.2 X-ray crystallographic analysis of 7

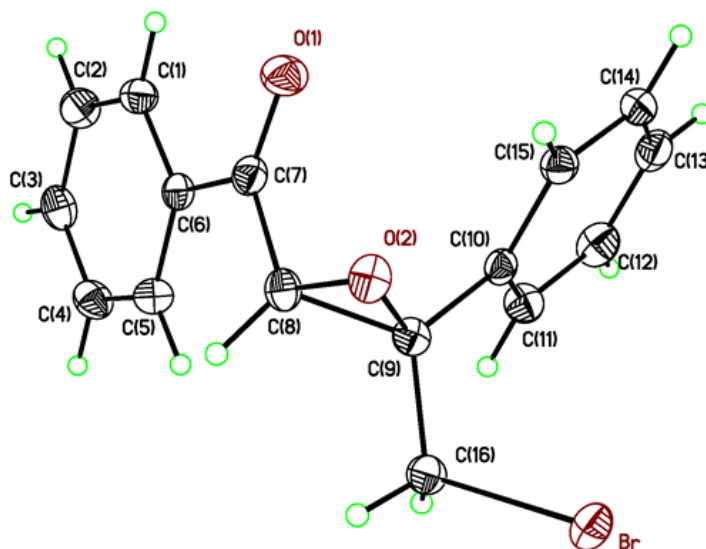

**Figure S2:** ORTEP diagram of compound **7**. The ellipsoid contour probability levels: 50%.

**Table S2.** Crystal data and structure refinement for **7**

|                                 |                                                   |                    |
|---------------------------------|---------------------------------------------------|--------------------|
| Identification code             | BSK061                                            |                    |
| Empirical formula               | C <sub>16</sub> H <sub>13</sub> Br O <sub>2</sub> |                    |
| Formula weight                  | 317.17                                            |                    |
| Temperature                     | 150(2) K                                          |                    |
| Wavelength                      | 0.71073 Å                                         |                    |
| Crystal system                  | Monoclinic                                        |                    |
| Space group                     | P2 <sub>1</sub> /c                                |                    |
| Unit cell dimensions            | a = 10.1139(5) Å                                  | a = 90°.           |
|                                 | b = 11.6747(7) Å                                  | b = 108.9428(18)°. |
|                                 | c = 11.8454(6) Å                                  | g = 90°.           |
| Volume                          | 1322.92(12) Å <sup>3</sup>                        |                    |
| Z                               | 4                                                 |                    |
| Density (calculated)            | 1.592 Mg/m <sup>3</sup>                           |                    |
| Absorption coefficient          | 3.101 mm <sup>-1</sup>                            |                    |
| F(000)                          | 640                                               |                    |
| Crystal size                    | 0.400 x 0.330 x 0.220 mm <sup>3</sup>             |                    |
| Theta range for data collection | 2.893 to 27.889°.                                 |                    |
| Index ranges                    | -13 ≤ h ≤ 13, -15 ≤ k ≤ 15, -15 ≤ l ≤ 15          |                    |
| Reflections collected           | 35462                                             |                    |
| Independent reflections         | 3156 [R(int) = 0.0389]                            |                    |
| Completeness to theta = 25.242° | 99.9 %                                            |                    |
| Absorption correction           | Semi-empirical from equivalents                   |                    |

|                                   |                                             |
|-----------------------------------|---------------------------------------------|
| Max. and min. transmission        | 0.7456 and 0.5911                           |
| Refinement method                 | Full-matrix least-squares on F <sup>2</sup> |
| Data / restraints / parameters    | 3156 / 0 / 172                              |
| Goodness-of-fit on F <sup>2</sup> | 0.942                                       |
| Final R indices [I>2sigma(I)]     | R1 = 0.0193, wR2 = 0.0506                   |
| R indices (all data)              | R1 = 0.0227, wR2 = 0.0527                   |
| Extinction coefficient            | n/a                                         |
| Largest diff. peak and hole       | 0.322 and -0.444 e.Å <sup>-3</sup>          |

### 4.3 X-ray crystallographic analysis of 13

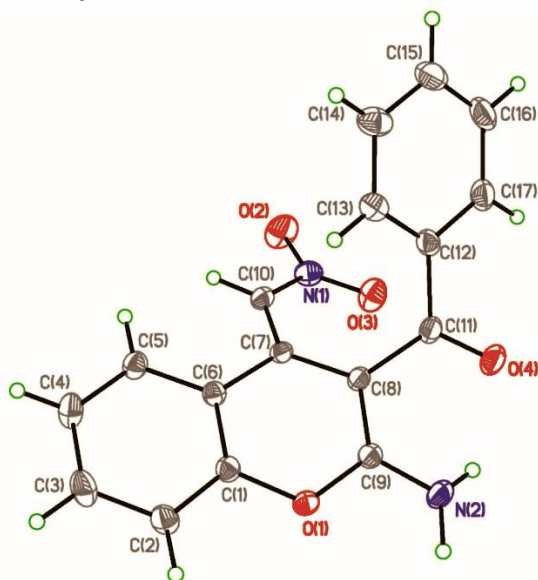

Figure S3: ORTEP diagram of compound **13**. The ellipsoid contour probability levels: 50%.

Table S3. Crystal data and structure refinement for **13**

|                                 |                                                               |                  |
|---------------------------------|---------------------------------------------------------------|------------------|
| Identification code             | wc367                                                         |                  |
| Empirical formula               | C <sub>17</sub> H <sub>12</sub> N <sub>2</sub> O <sub>4</sub> |                  |
| Formula weight                  | 308.29                                                        |                  |
| Temperature                     | 299(2) K                                                      |                  |
| Wavelength                      | 0.71073 Å                                                     |                  |
| Crystal system                  | Triclinic                                                     |                  |
| Space group                     | P -1                                                          |                  |
| Unit cell dimensions            | a = 9.9701(6) Å                                               | a = 95.001(2)°.  |
|                                 | b = 13.2908(8) Å                                              | b = 105.659(2)°. |
|                                 | c = 15.0201(8) Å                                              | g = 110.163(2)°. |
| Volume                          | 1762.88(18) Å <sup>3</sup>                                    |                  |
| Z                               | 4                                                             |                  |
| Density (calculated)            | 1.162 Mg/m <sup>3</sup>                                       |                  |
| Absorption coefficient          | 0.084 mm <sup>-1</sup>                                        |                  |
| F(000)                          | 640                                                           |                  |
| Crystal size                    | 0.57 x 0.48 x 0.37 mm <sup>3</sup>                            |                  |
| Theta range for data collection | 3.05 to 26.44°.                                               |                  |
| Index ranges                    | -12 ≤ h ≤ 12, -16 ≤ k ≤ 16, -18 ≤ l ≤ 17                      |                  |
| Reflections collected           | 29560                                                         |                  |
| Independent reflections         | 7212 [R(int) = 0.0340]                                        |                  |
| Completeness to theta = 26.44°  | 99.3 %                                                        |                  |

|                                   |                                             |
|-----------------------------------|---------------------------------------------|
| Absorption correction             | Semi-empirical from equivalents             |
| Max. and min. transmission        | 0.9694 and 0.9534                           |
| Refinement method                 | Full-matrix least-squares on F <sup>2</sup> |
| Data / restraints / parameters    | 7212 / 0 / 419                              |
| Goodness-of-fit on F <sup>2</sup> | 1.096                                       |
| Final R indices [I>2sigma(I)]     | R1 = 0.0869, wR2 = 0.2620                   |
| R indices (all data)              | R1 = 0.1087, wR2 = 0.2894                   |
| Largest diff. peak and hole       | 0.467 and -0.457 e.Å <sup>-3</sup>          |

#### 4.4 X-ray crystallographic analysis of 18a

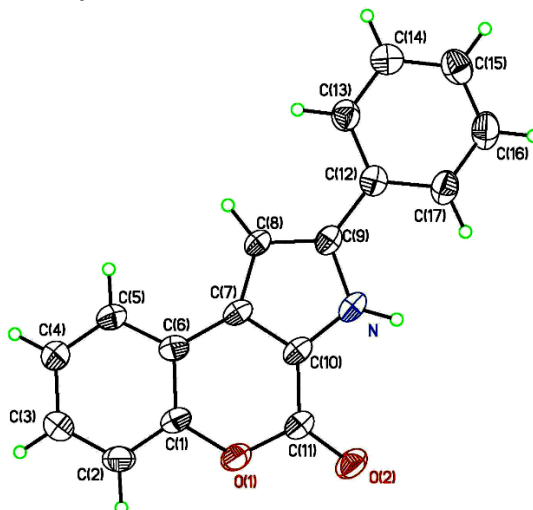

**Figure S4:** ORTEP diagram of compound **18a**. The ellipsoid contour probability levels: 50%.

**Table S4.** Crystal data and structure refinement for **18a**.

|                                 |                                                  |                   |
|---------------------------------|--------------------------------------------------|-------------------|
| Identification code             | BSK054                                           |                   |
| Empirical formula               | C <sub>17</sub> H <sub>11</sub> N O <sub>2</sub> |                   |
| Formula weight                  | 261.27                                           |                   |
| Temperature                     | 150(2) K                                         |                   |
| Wavelength                      | 0.71073 Å                                        |                   |
| Crystal system                  | Monoclinic                                       |                   |
| Space group                     | P2 <sub>1</sub> /c                               |                   |
| Unit cell dimensions            | a = 13.1240(5) Å                                 | a = 90°.          |
|                                 | b = 7.1357(3) Å                                  | b = 97.3102(15)°. |
|                                 | c = 13.3340(6) Å                                 | g = 90°.          |
| Volume                          | 1238.56(9) Å <sup>3</sup>                        |                   |
| Z                               | 4                                                |                   |
| Density (calculated)            | 1.401 Mg/m <sup>3</sup>                          |                   |
| Absorption coefficient          | 0.093 mm <sup>-1</sup>                           |                   |
| F(000)                          | 544                                              |                   |
| Crystal size                    | 0.380 x 0.260 x 0.070 mm <sup>3</sup>            |                   |
| Theta range for data collection | 3.130 to 27.906°.                                |                   |
| Index ranges                    | -16 ≤ h ≤ 17, -9 ≤ k ≤ 9, -17 ≤ l ≤ 17           |                   |
| Reflections collected           | 43722                                            |                   |
| Independent reflections         | 2969 [R(int) = 0.0803]                           |                   |
| Completeness to theta = 25.242° | 99.9 %                                           |                   |
| Absorption correction           | Semi-empirical from equivalents                  |                   |
| Max. and min. transmission      | 0.7456 and 0.7047                                |                   |

|                                   |                                             |
|-----------------------------------|---------------------------------------------|
| Refinement method                 | Full-matrix least-squares on F <sup>2</sup> |
| Data / restraints / parameters    | 2969 / 0 / 182                              |
| Goodness-of-fit on F <sup>2</sup> | 1.044                                       |
| Final R indices [I>2sigma(I)]     | R1 = 0.0520, wR2 = 0.1403                   |
| R indices (all data)              | R1 = 0.0763, wR2 = 0.1576                   |
| Extinction coefficient            | n/a                                         |
| Largest diff. peak and hole       | 0.619 and -0.247 e.Å <sup>-3</sup>          |



5. Copies of  $^1\text{H}$  and  $^{13}\text{C}$  NMR spectra of synthesized compounds

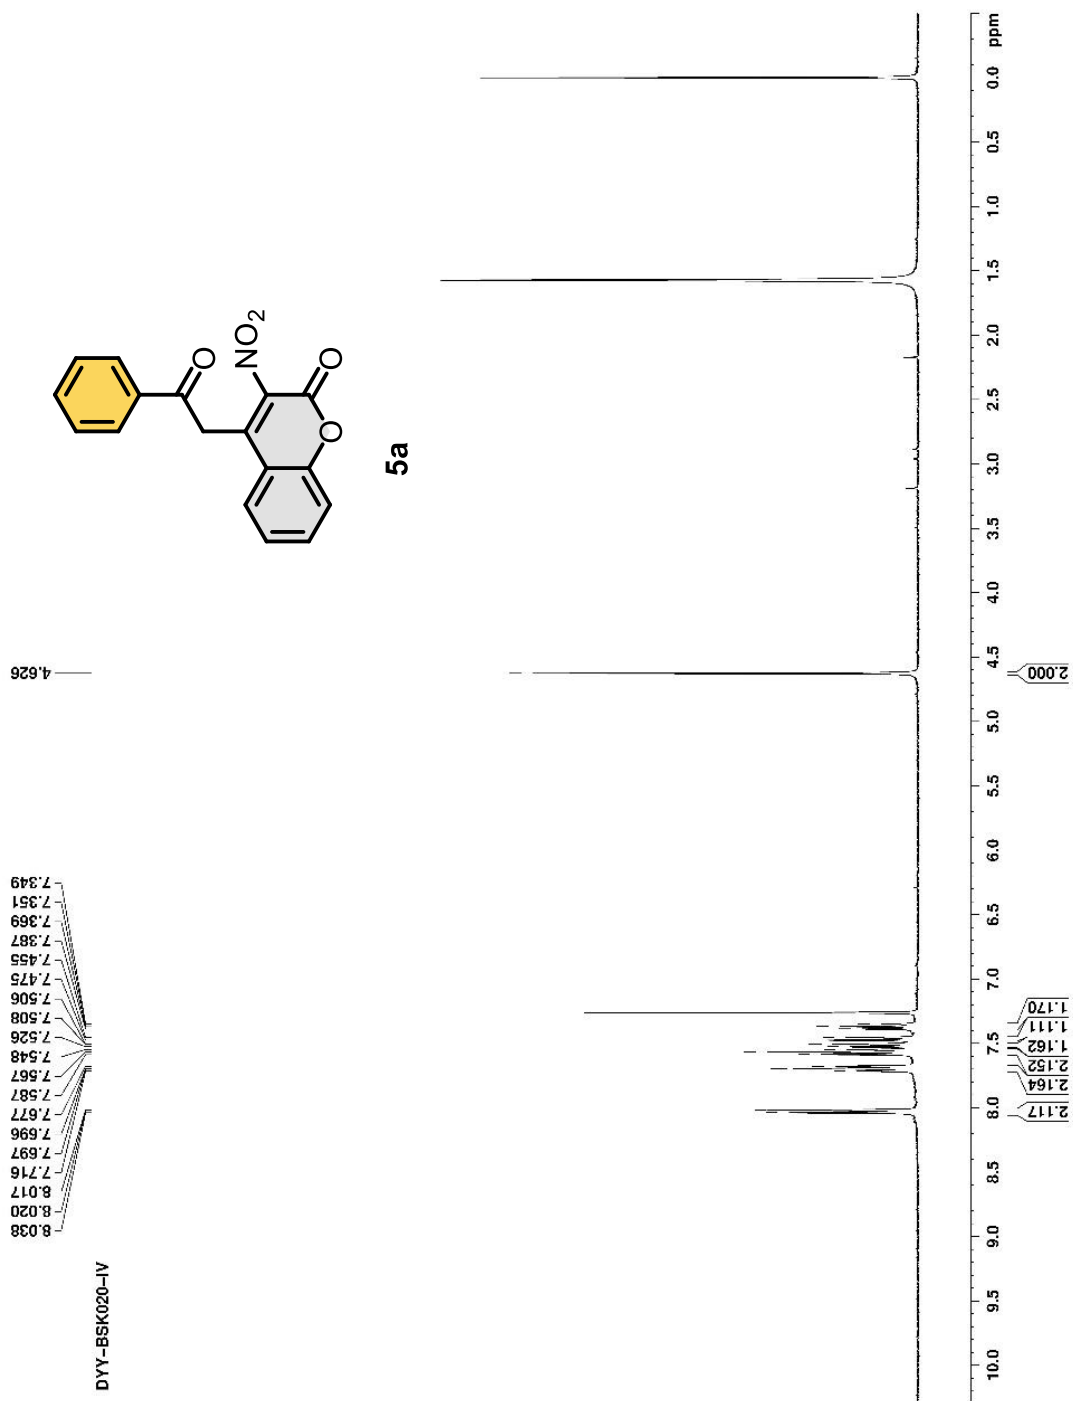

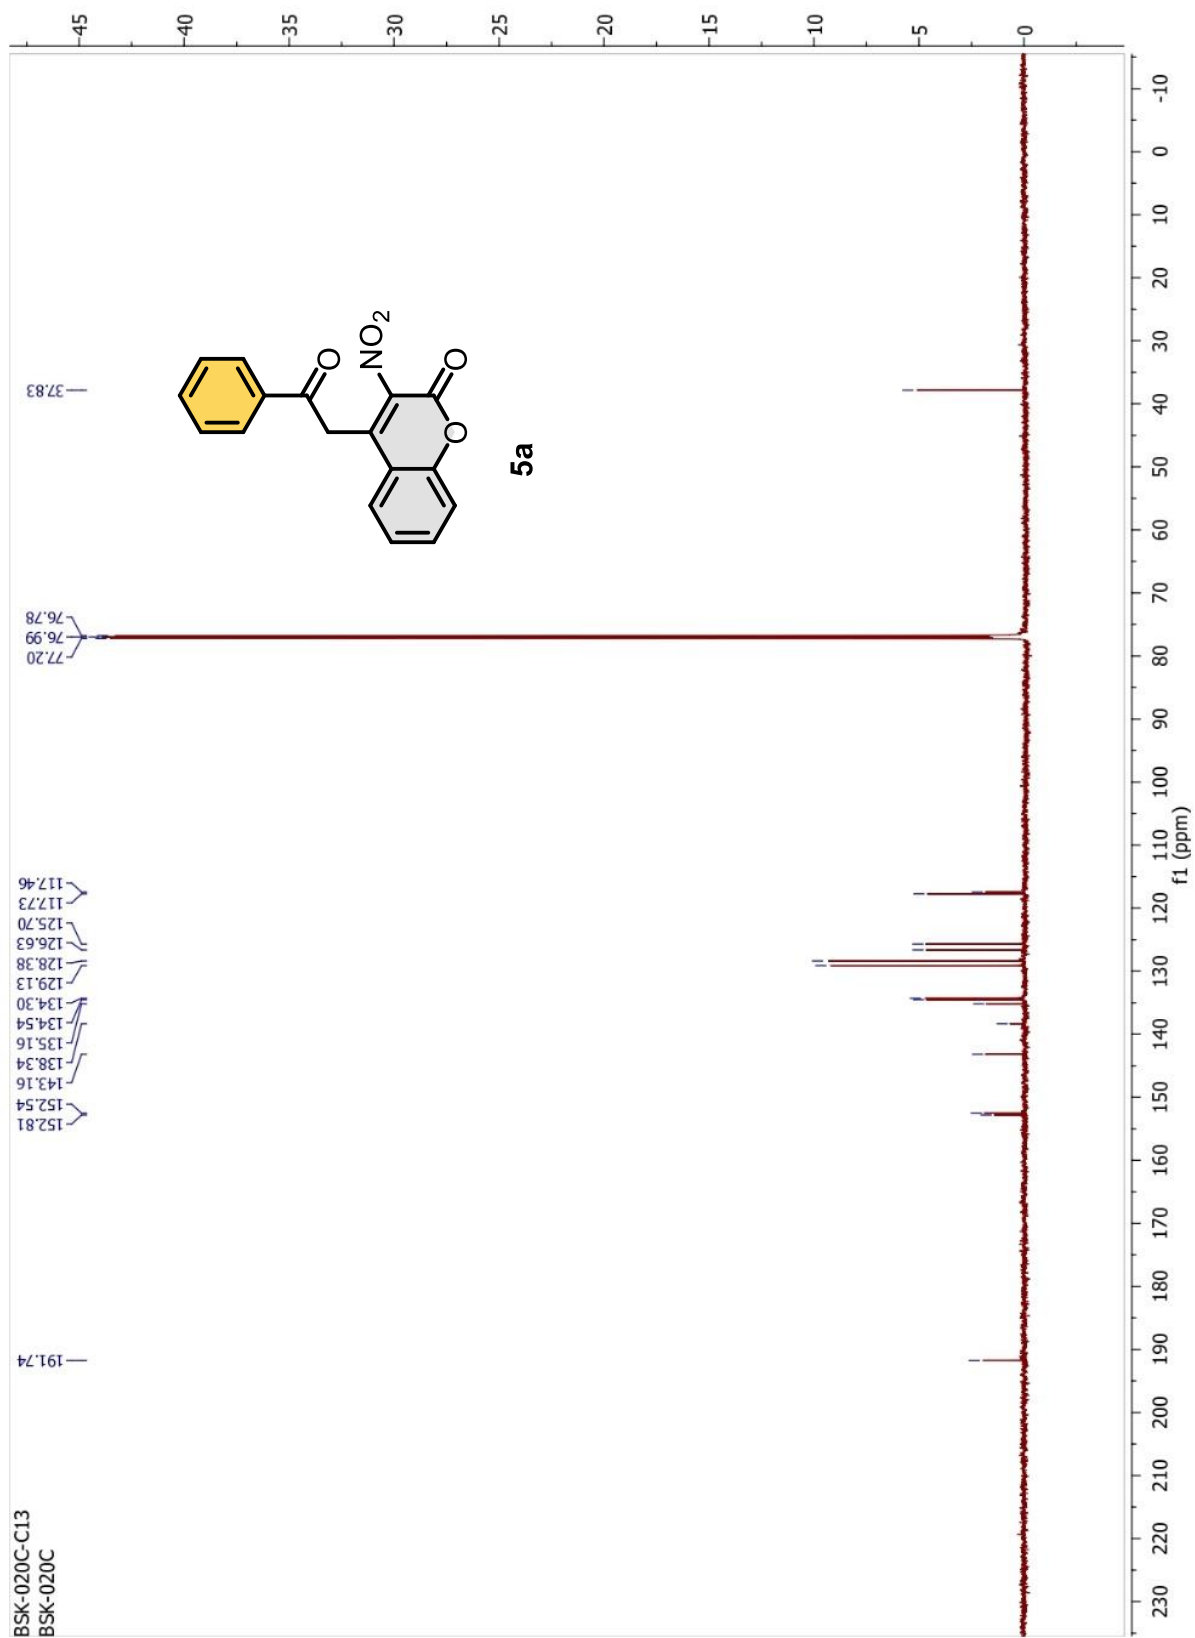

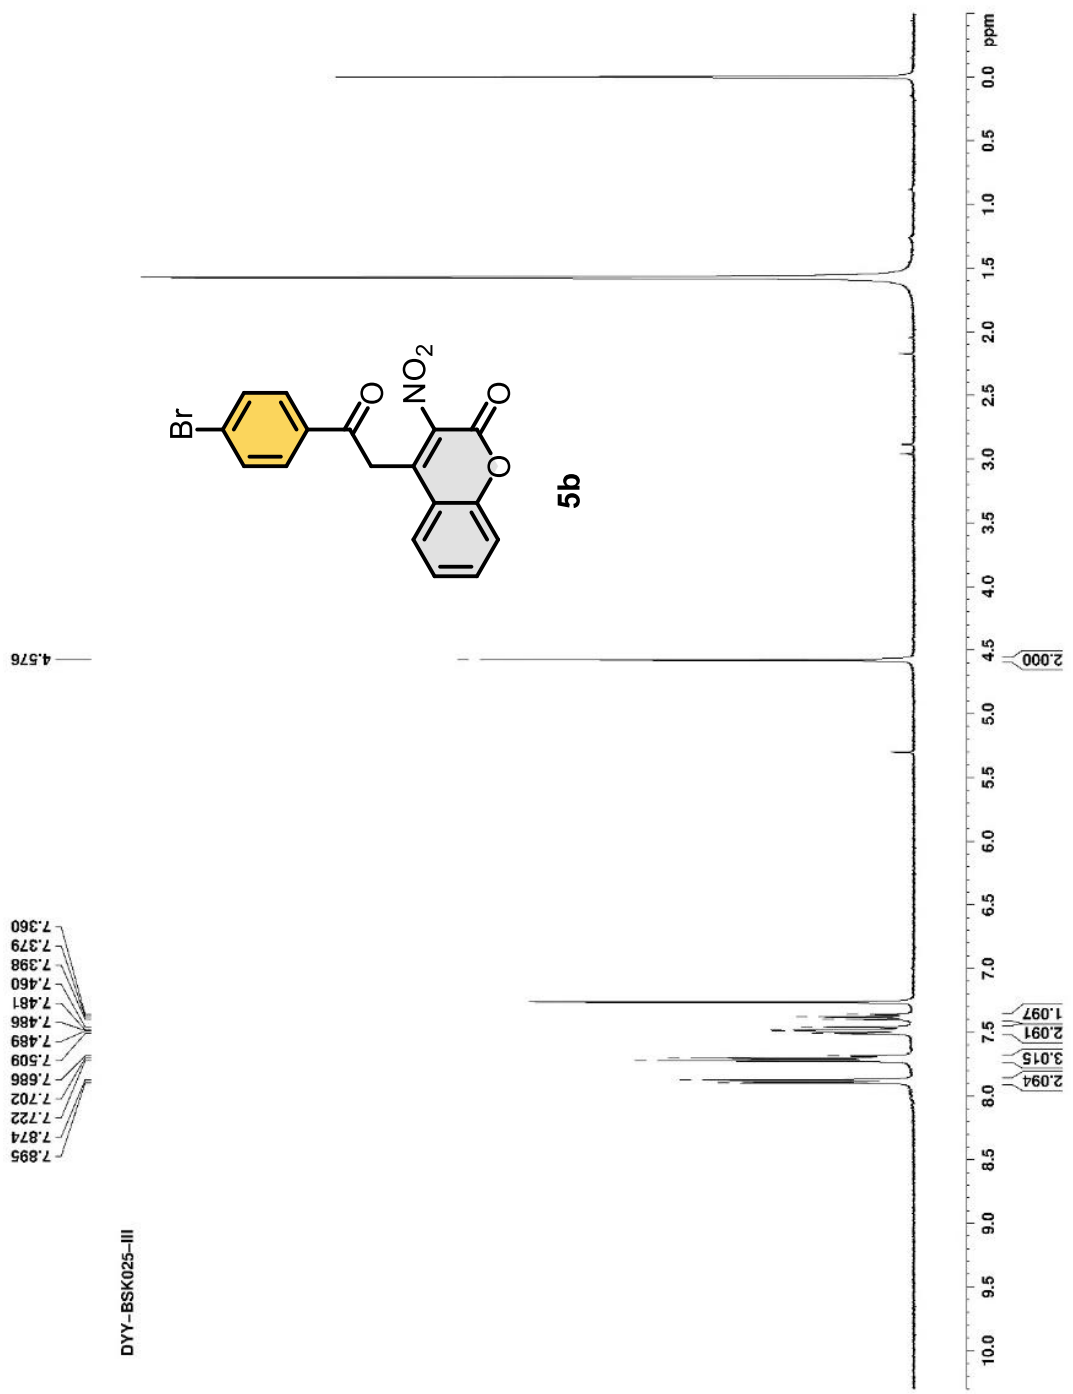

DYY-BSK025-III

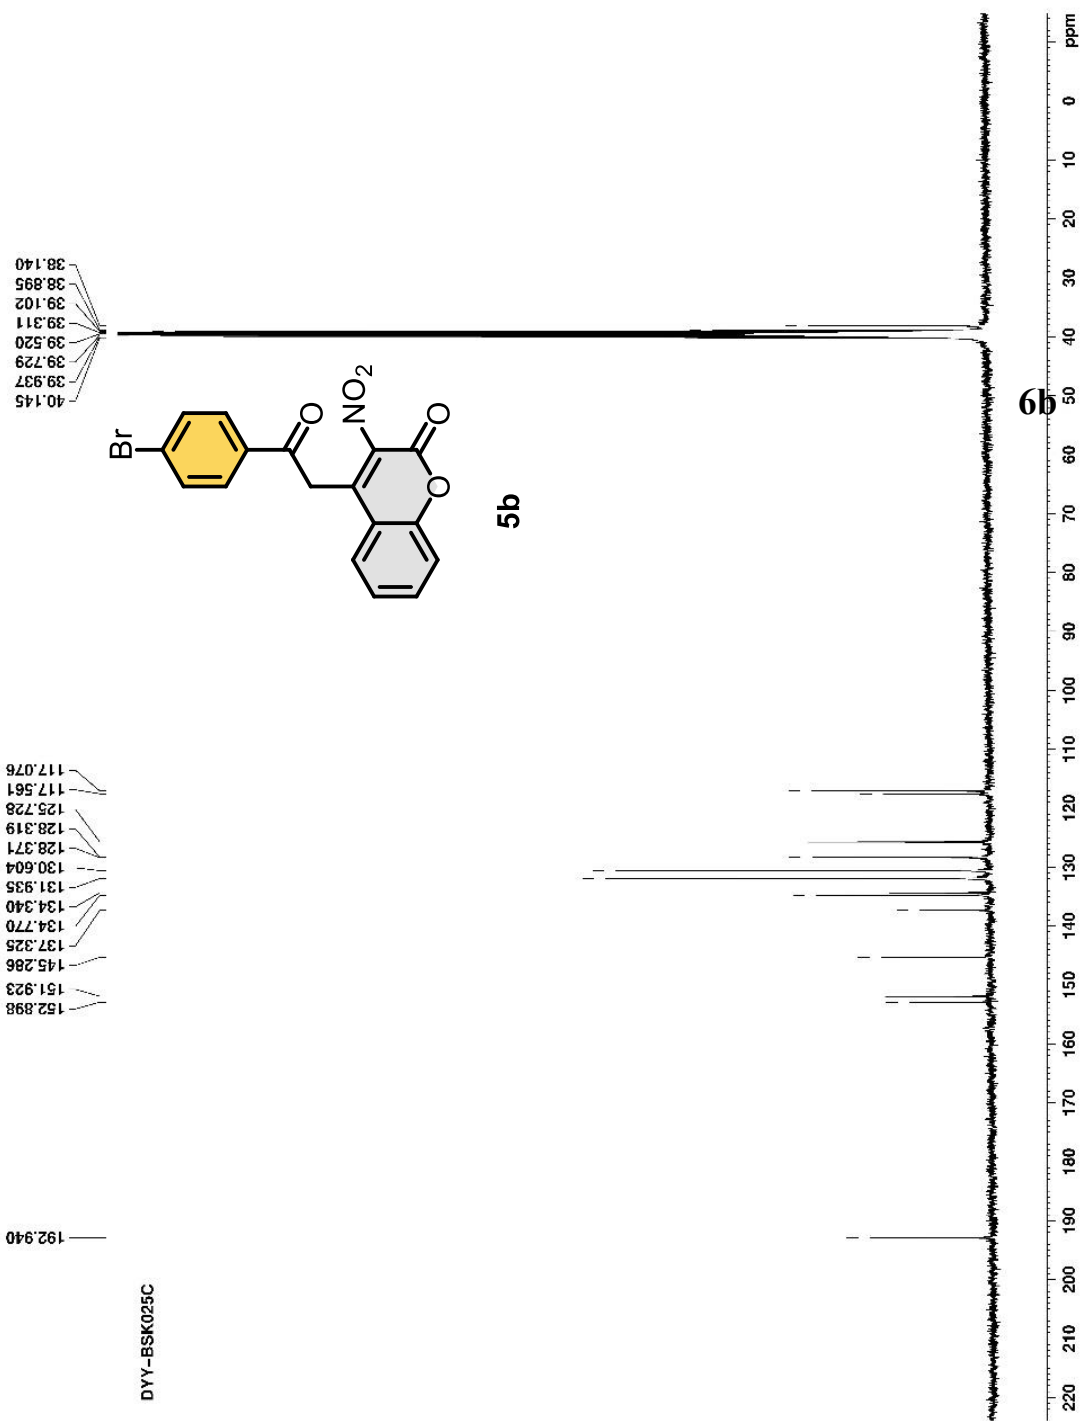

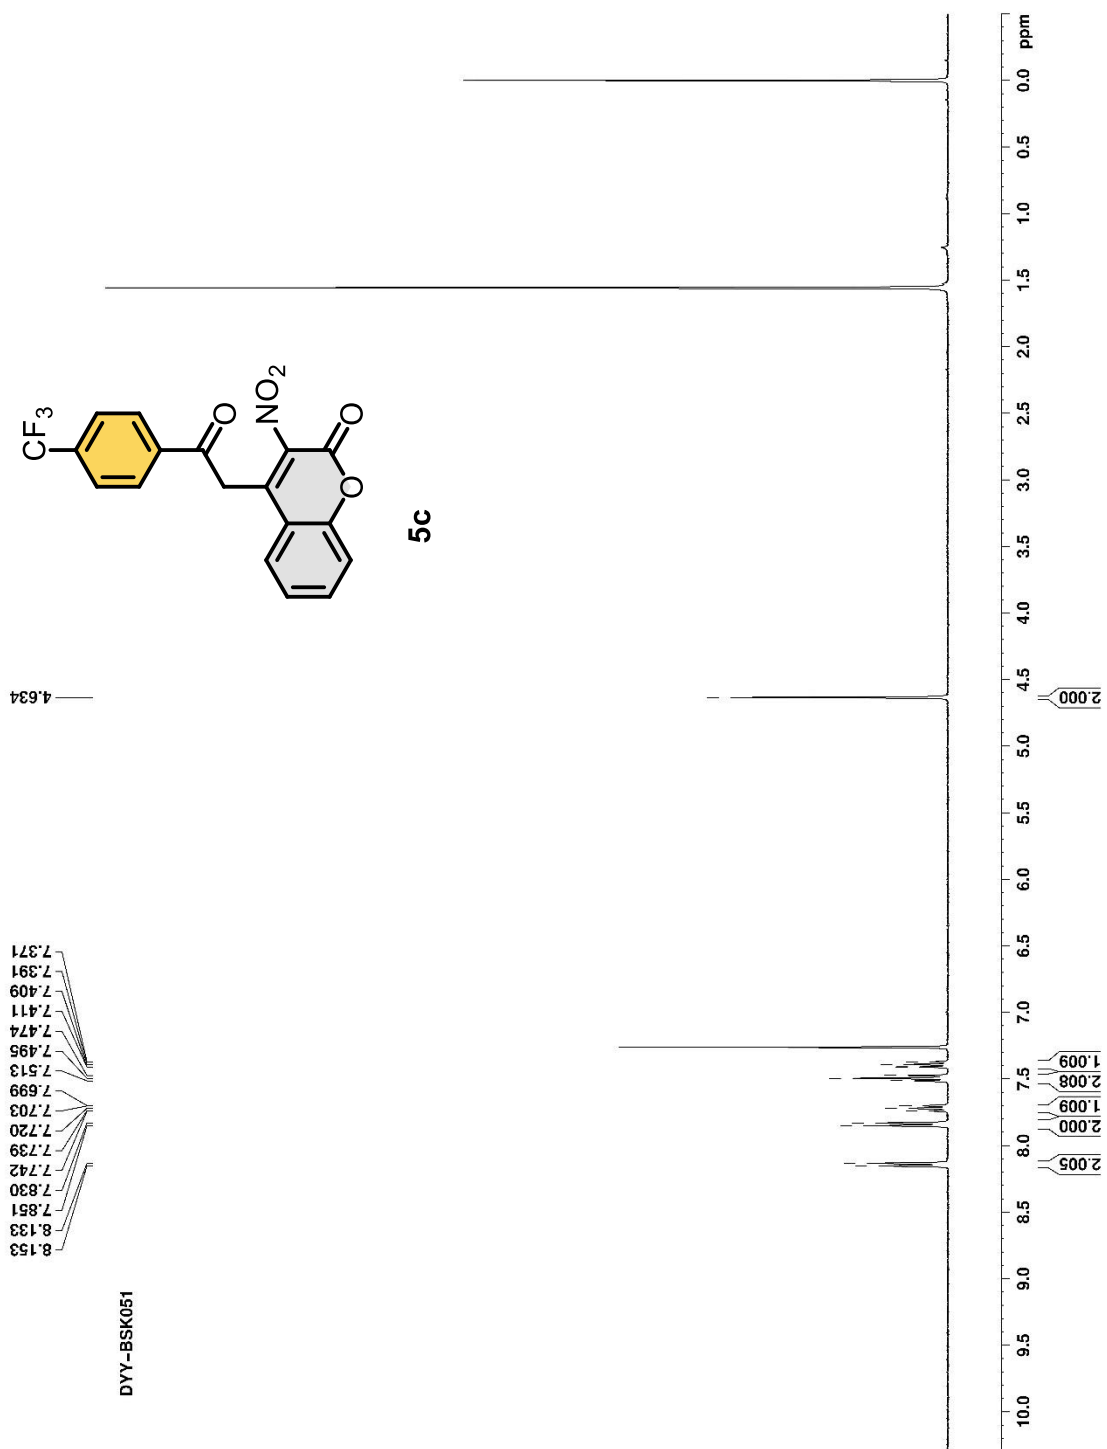

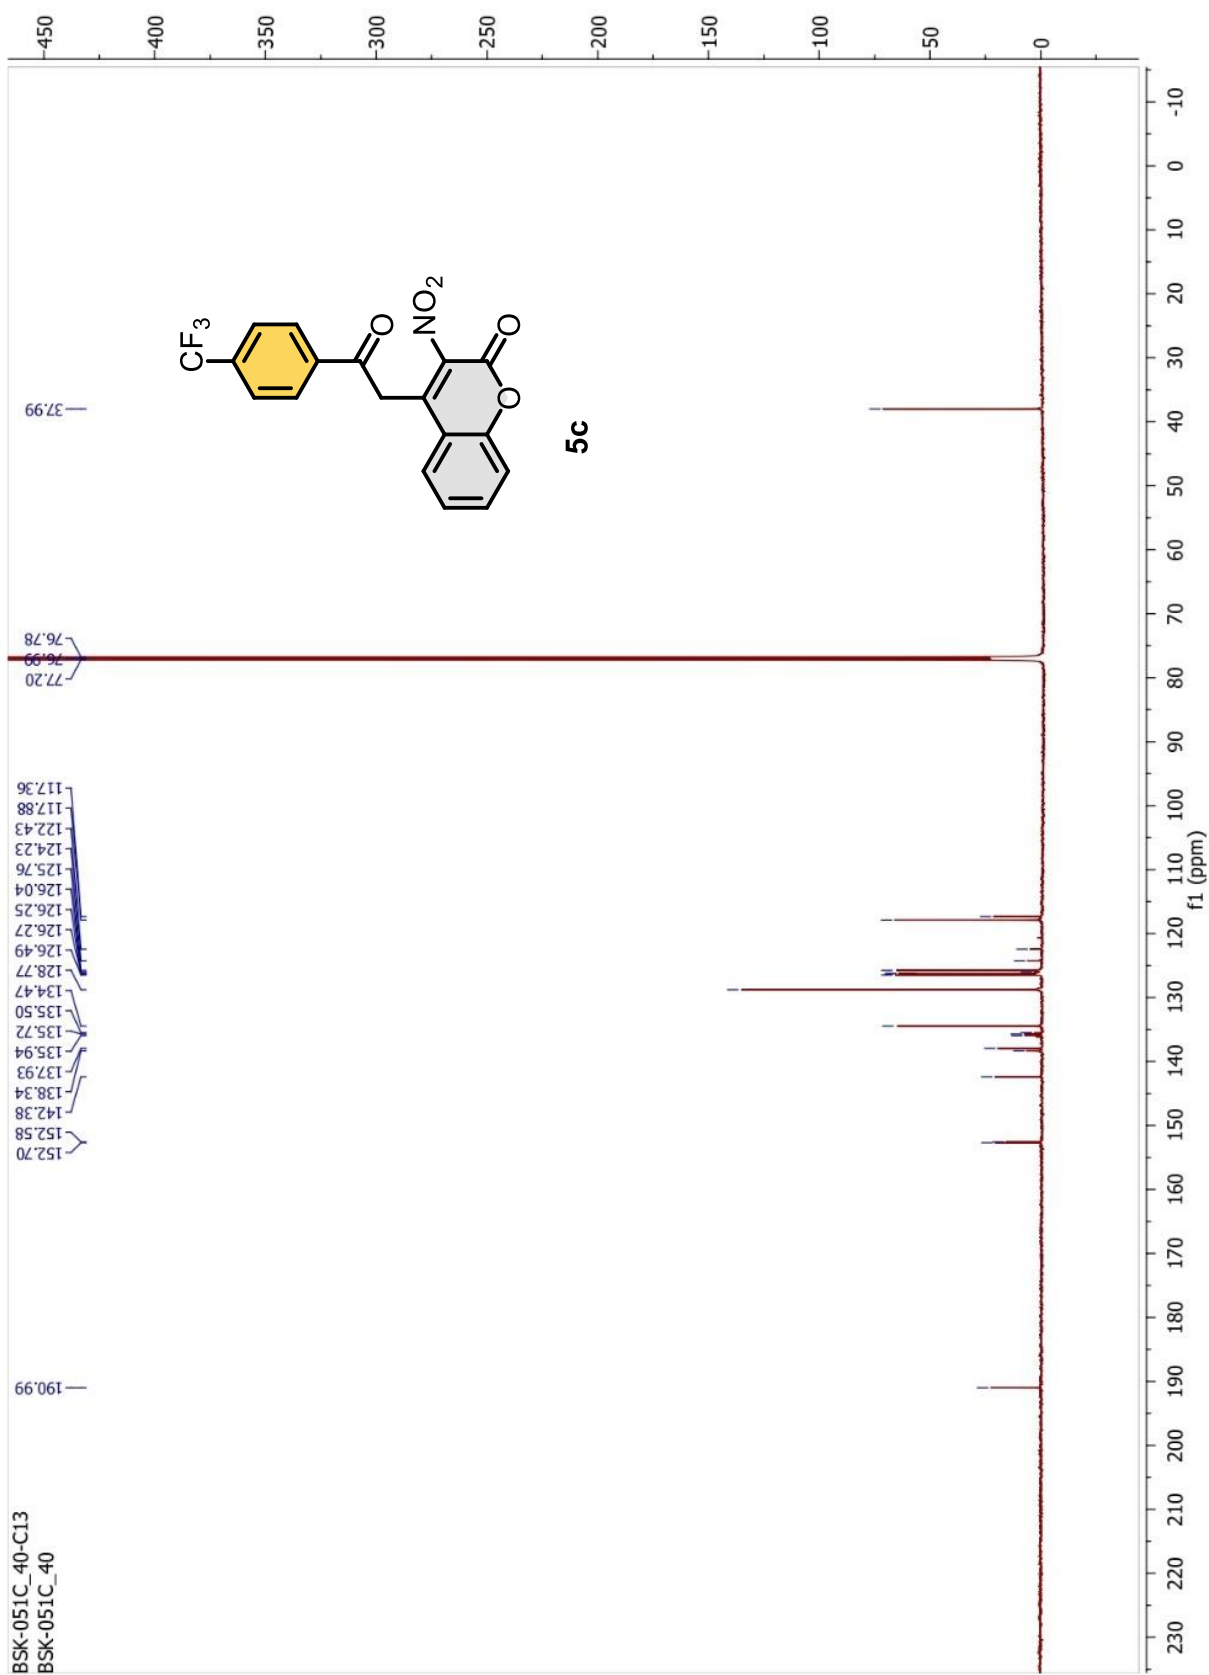

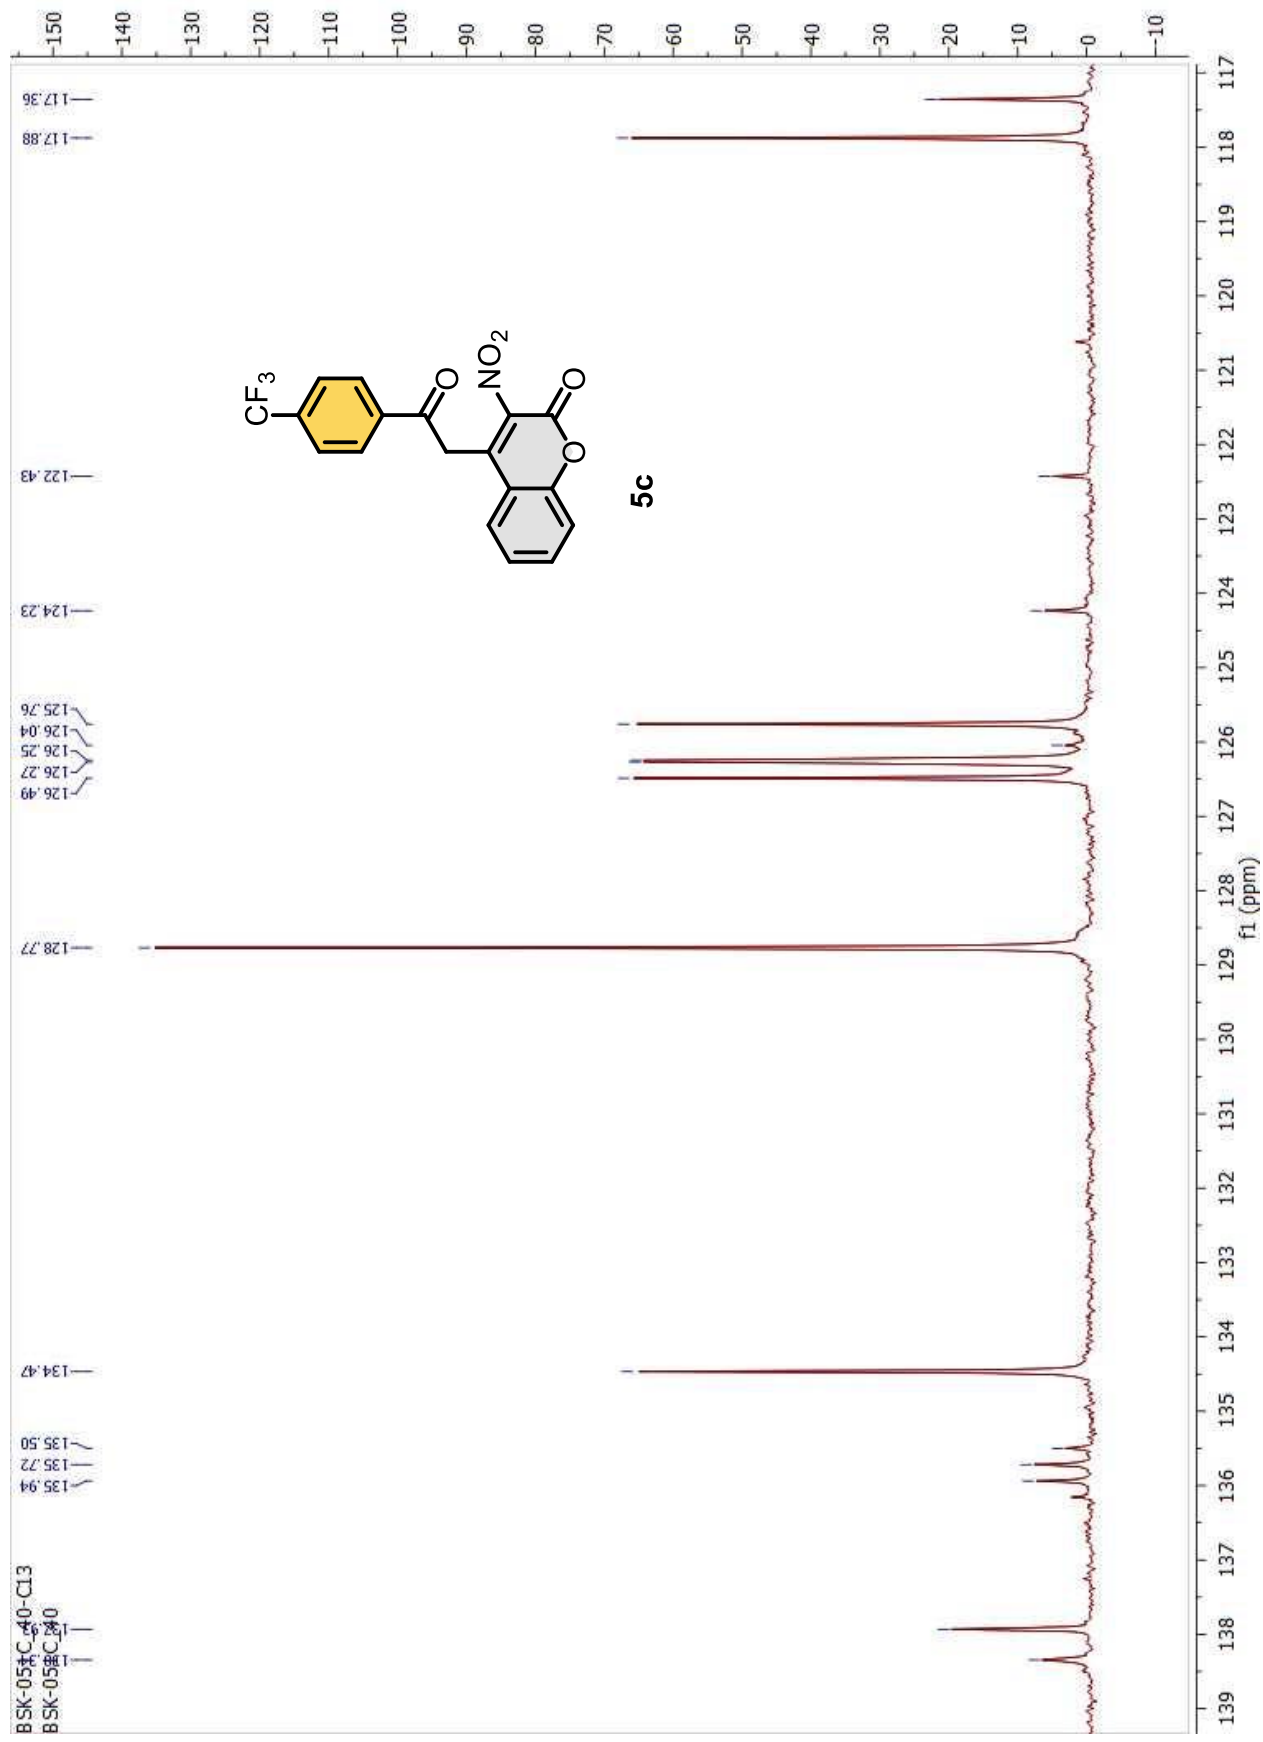

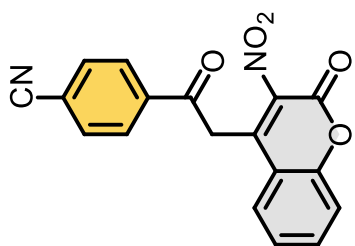

5d

4.619

8.134  
8.114  
7.885  
7.865  
7.747  
7.728  
7.708  
7.512  
7.494  
7.474  
7.418  
7.398  
7.379

DYY-BSK042-IV

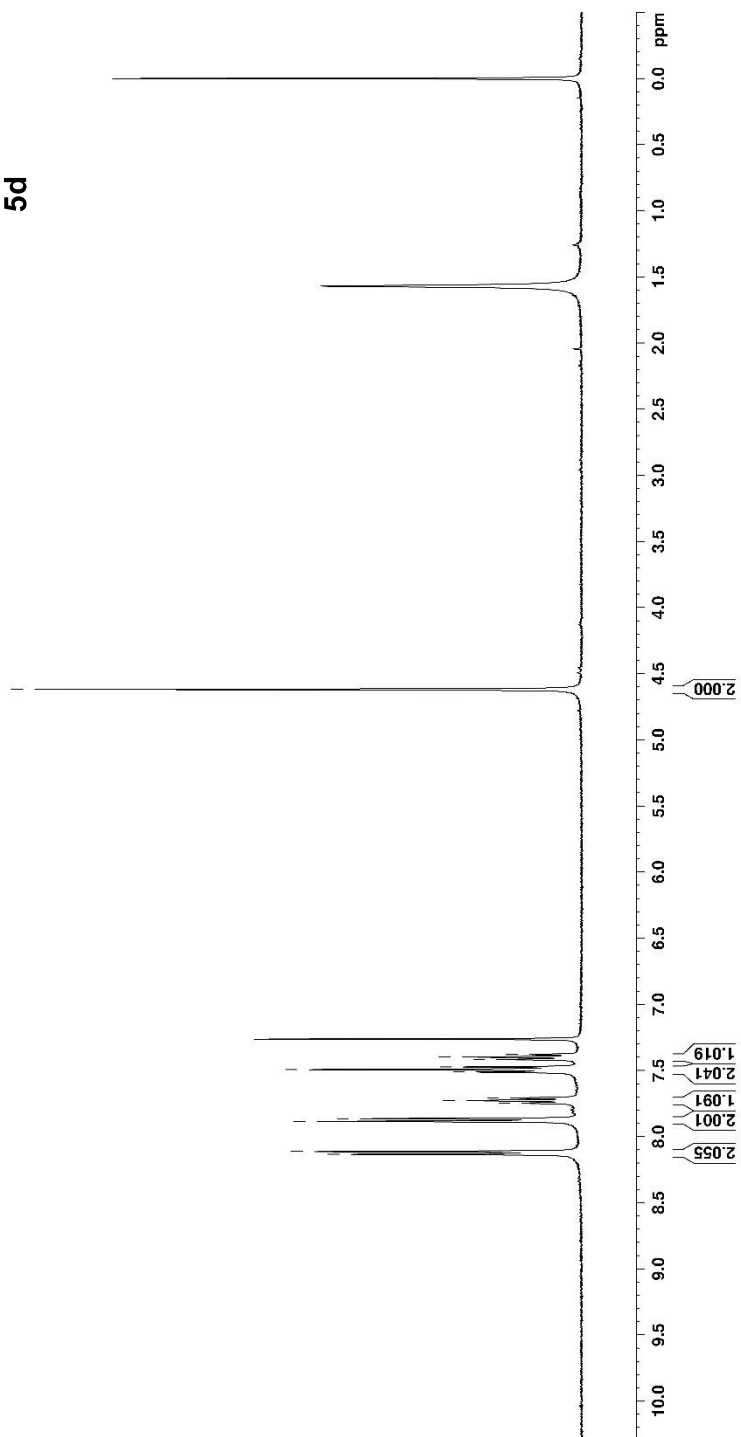



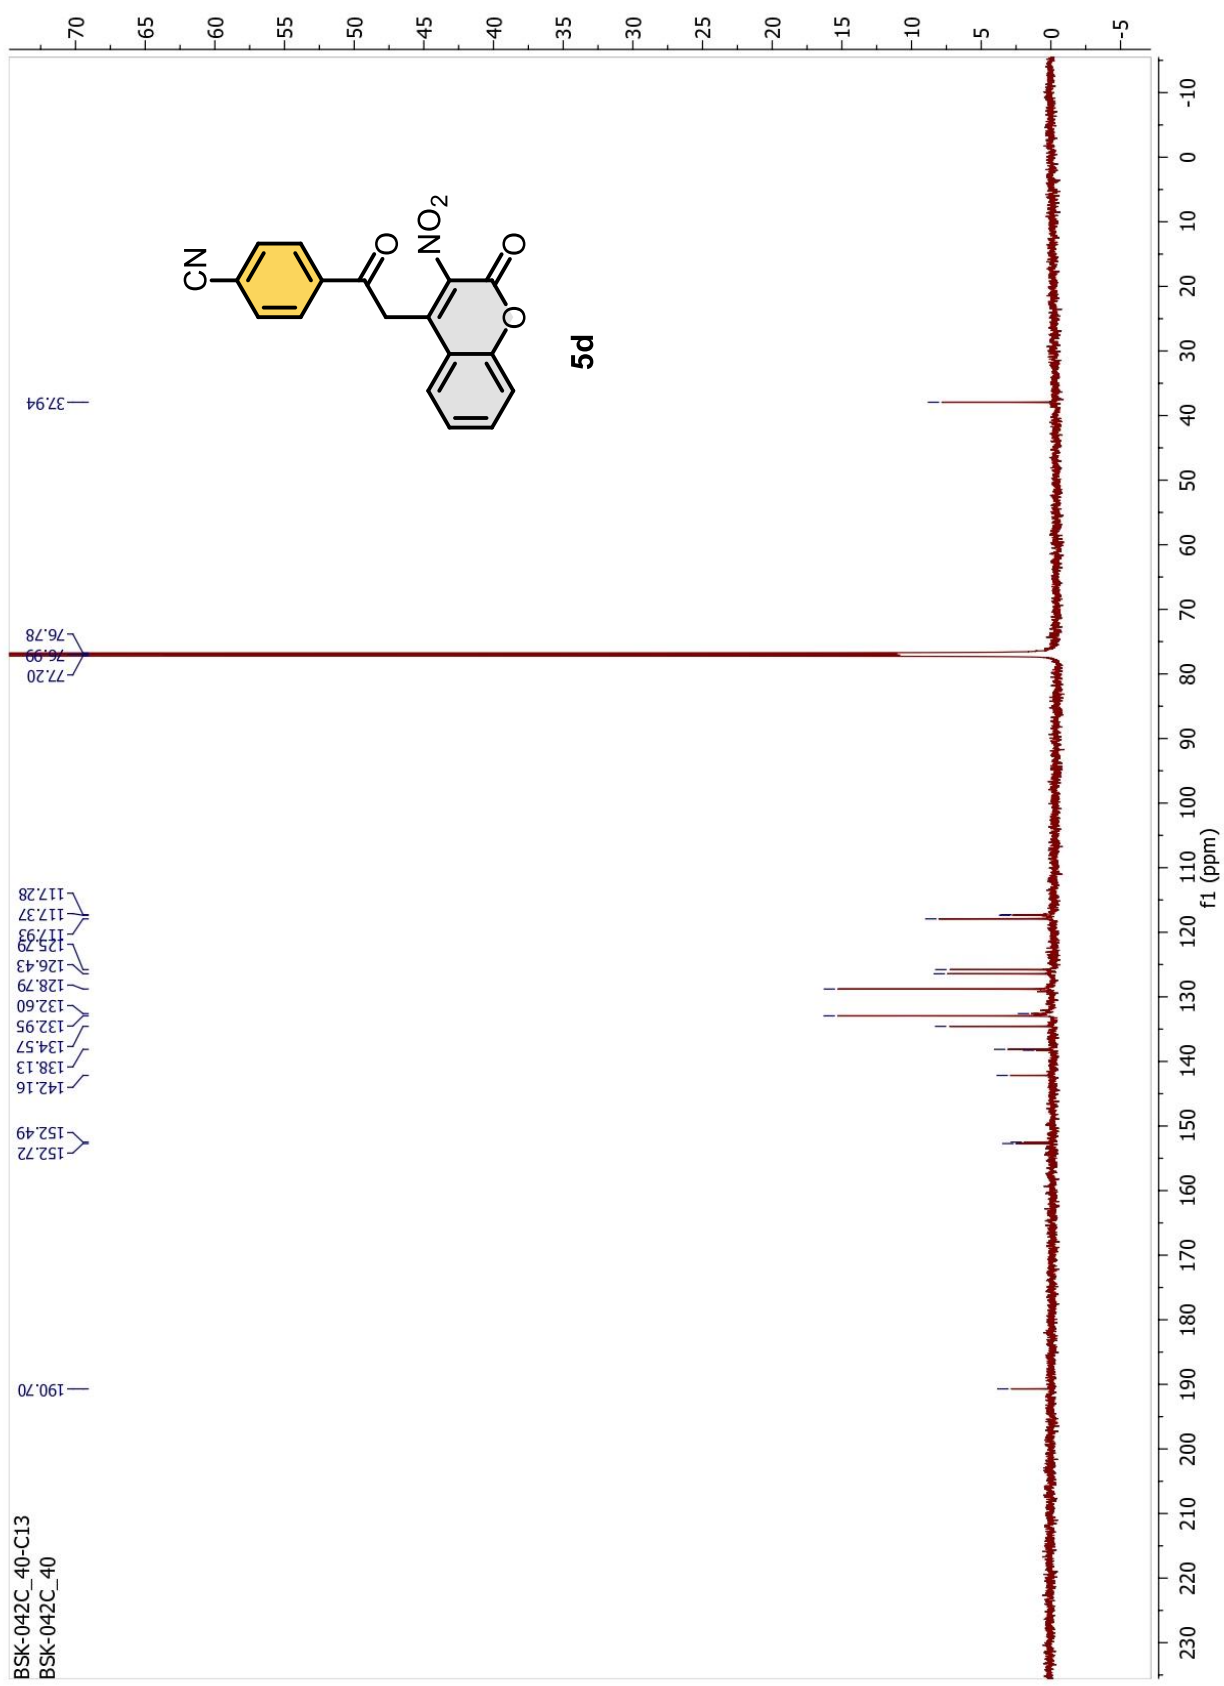

DYY-BSK043

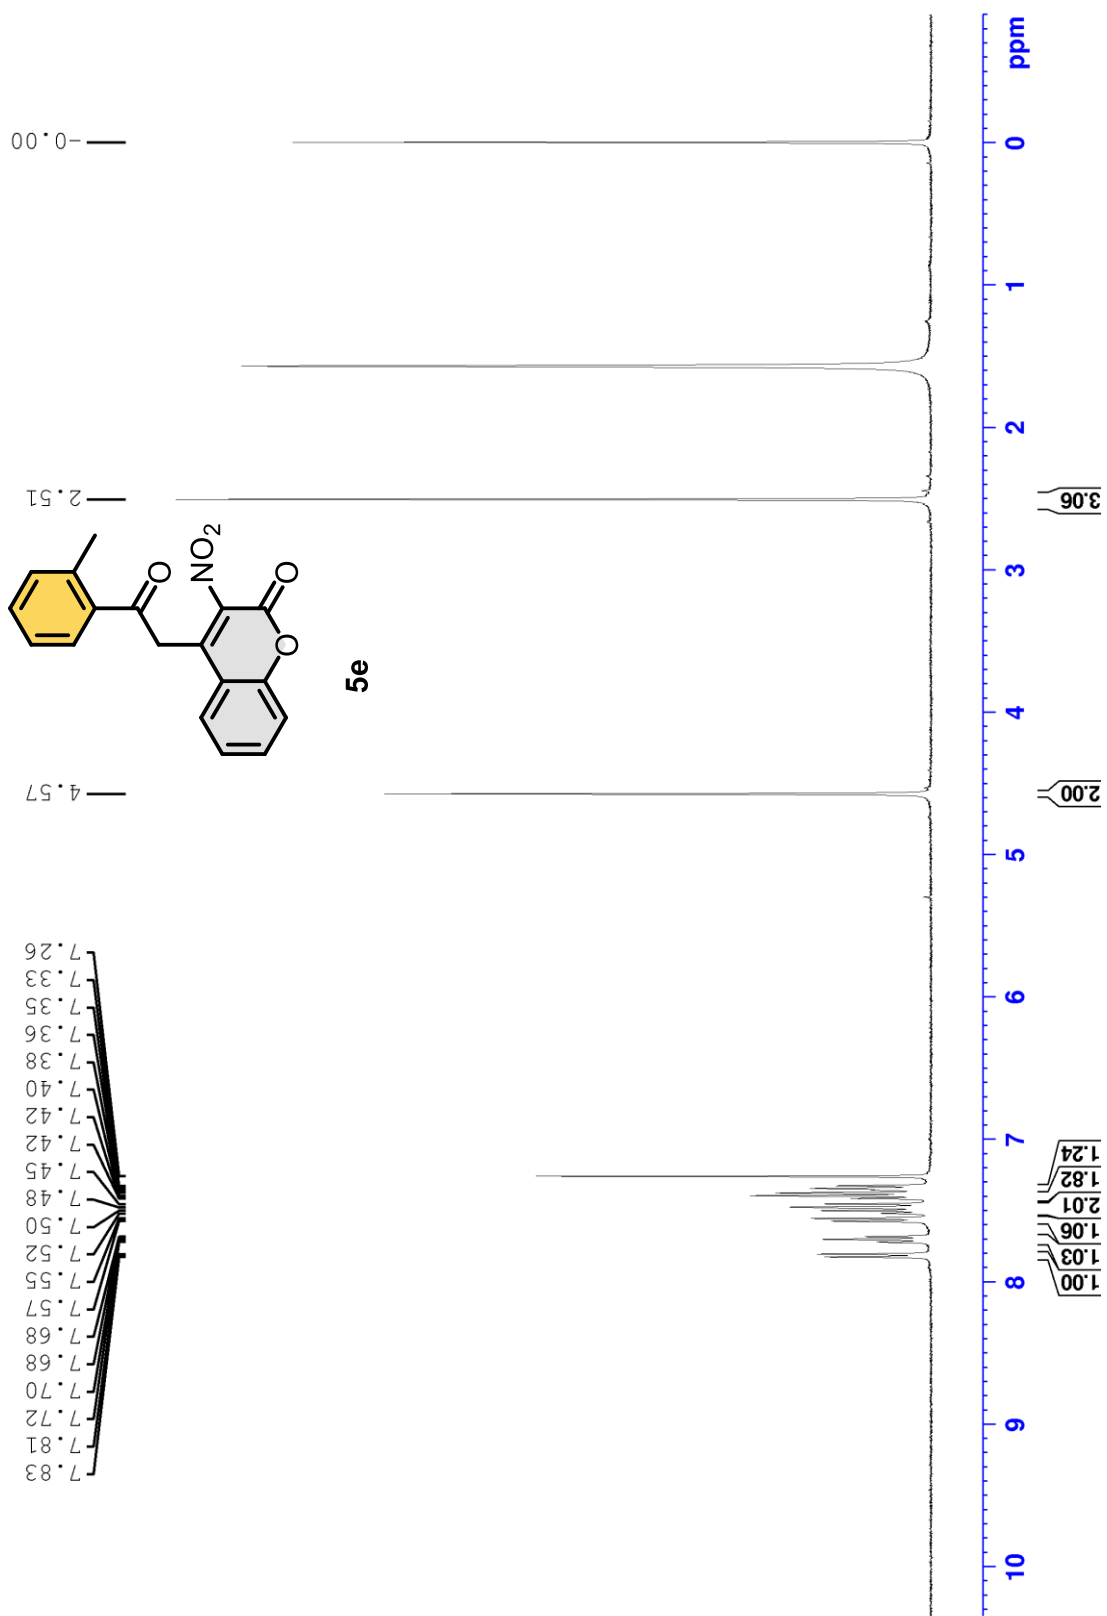

DYY-BSK043

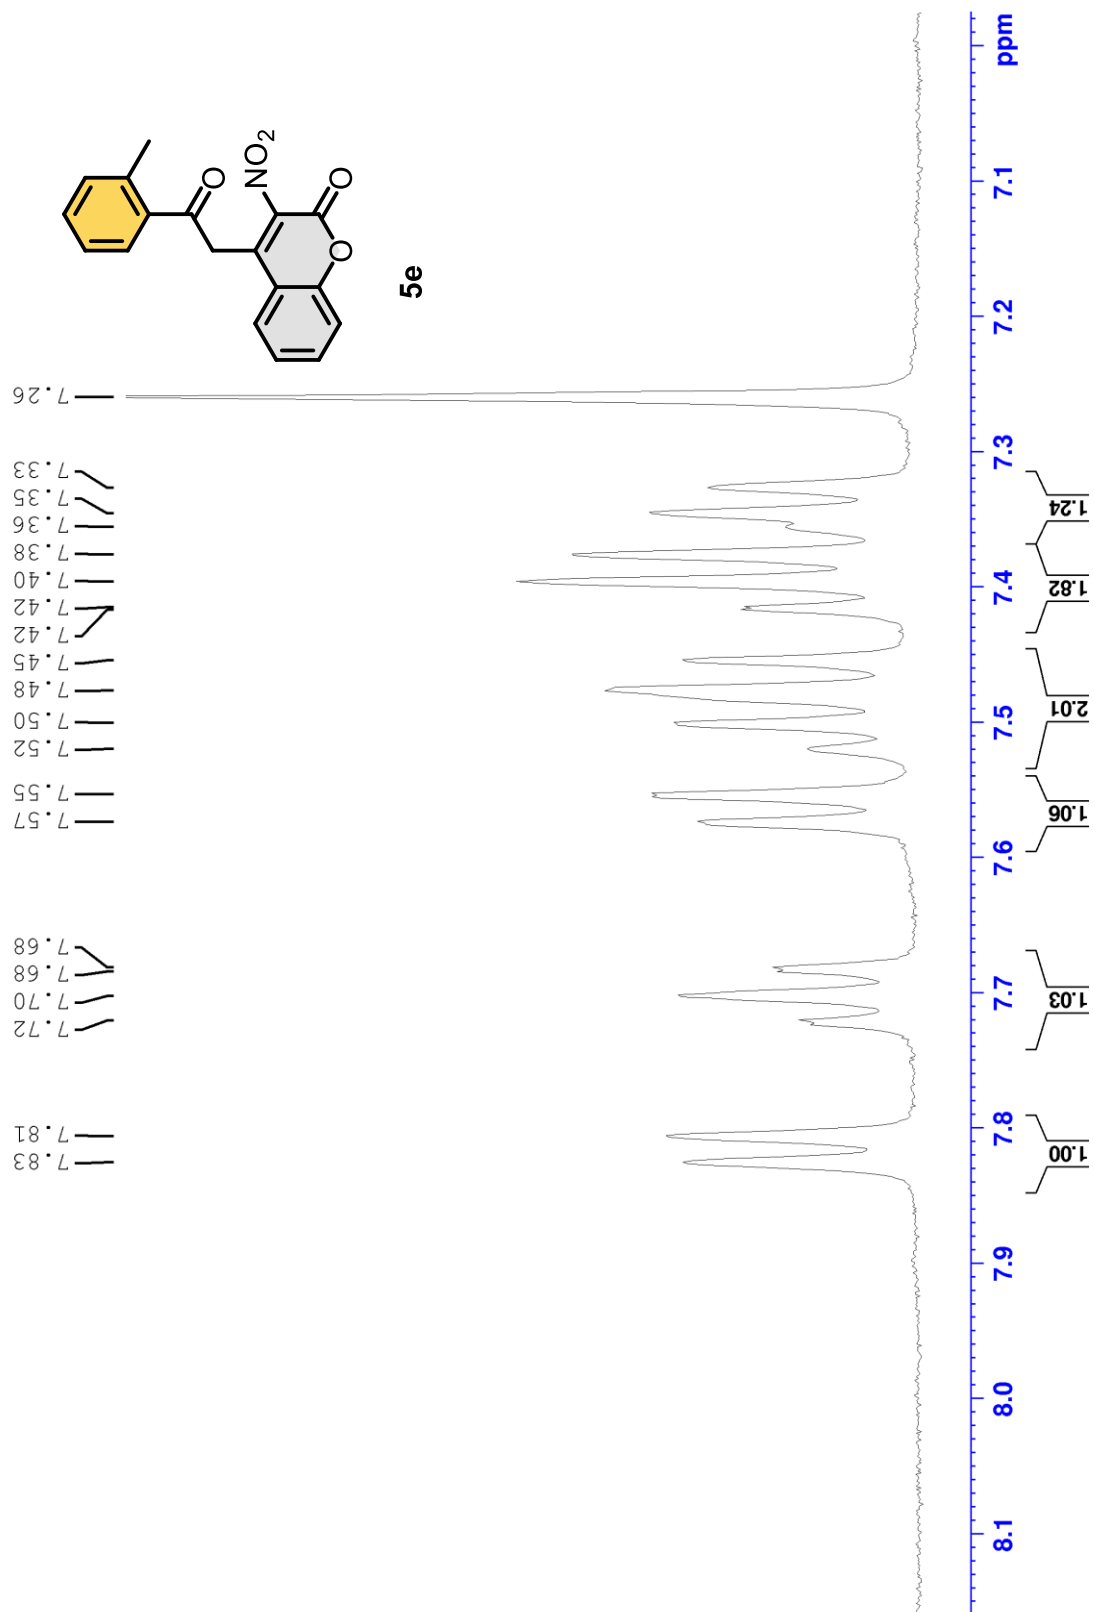

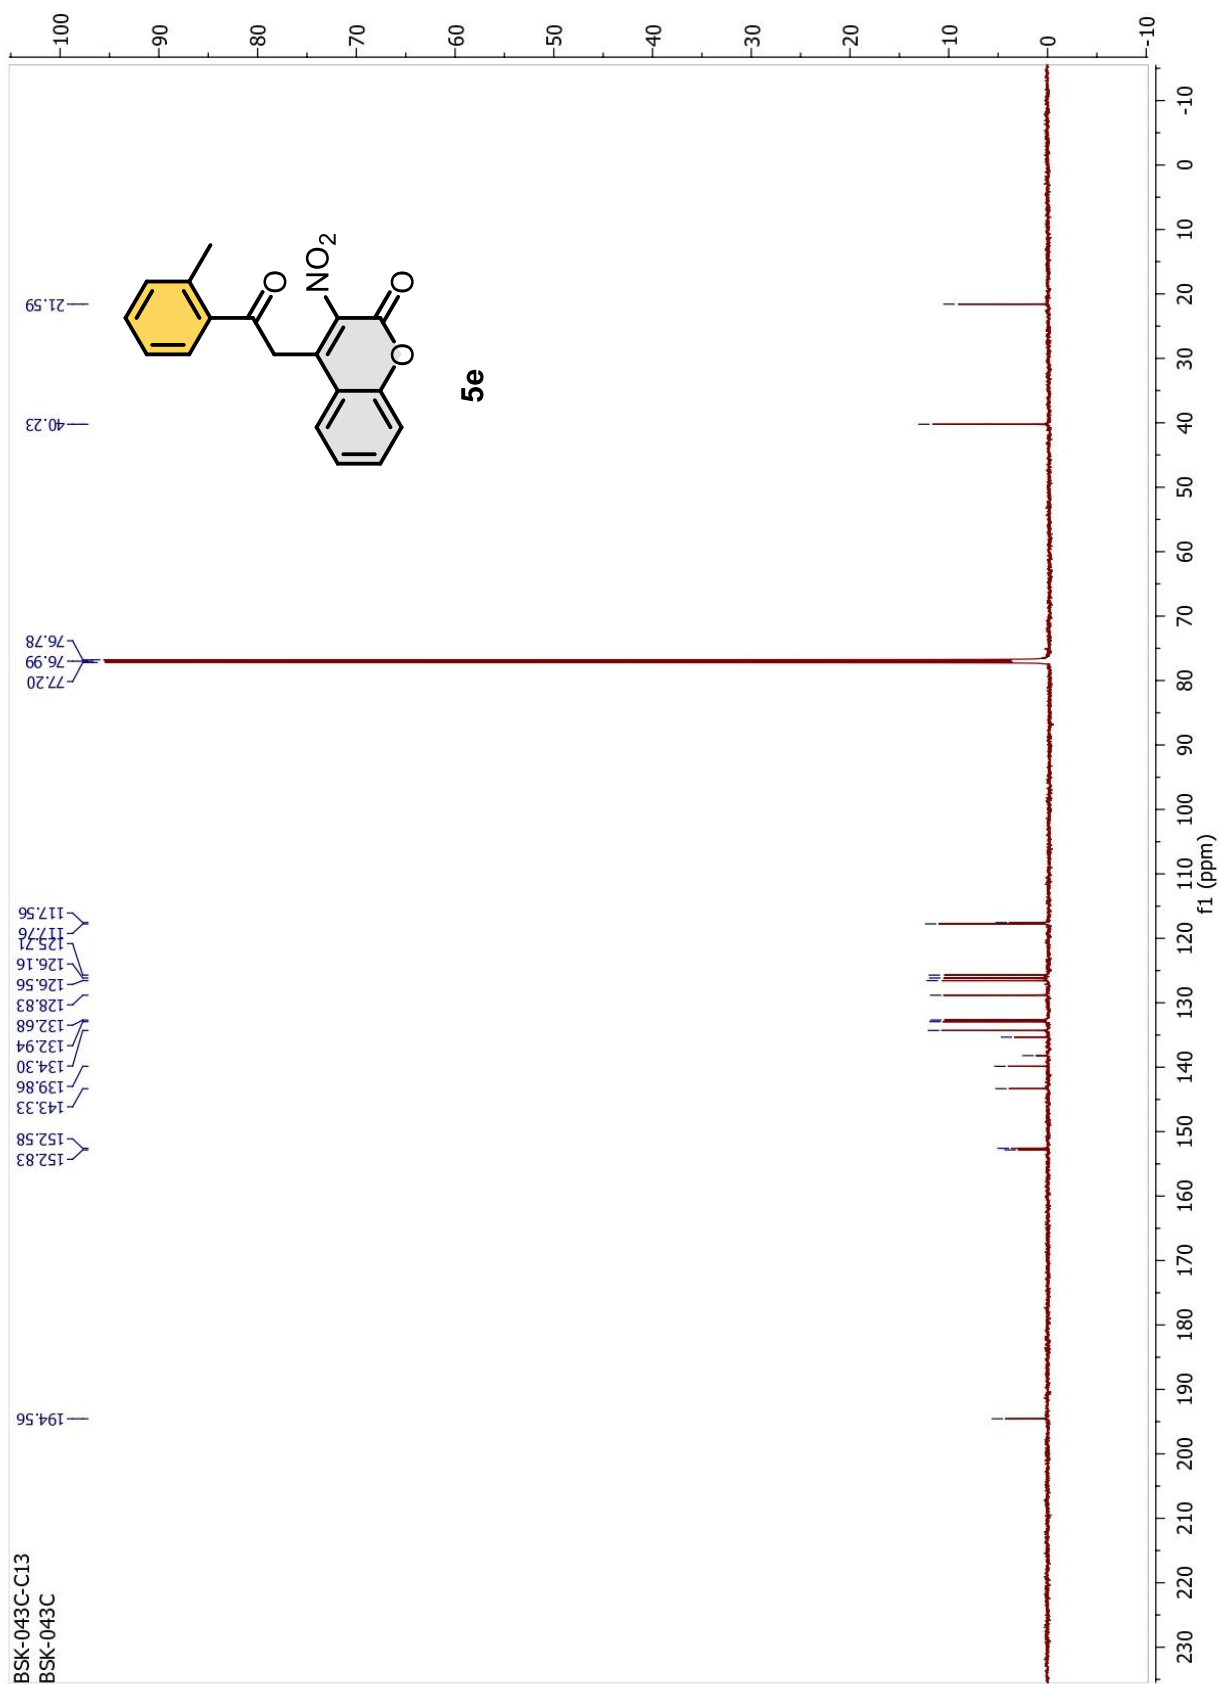

DYY-BSK050

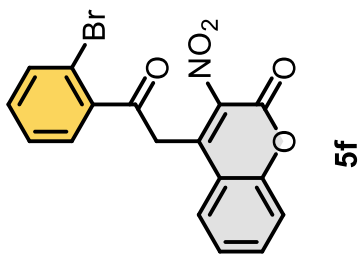

4.62

7.39  
7.41  
7.43  
7.45  
7.46  
7.47  
7.48  
7.49  
7.54  
7.54  
7.56  
7.56  
7.68  
7.70  
7.71  
7.73  
7.75

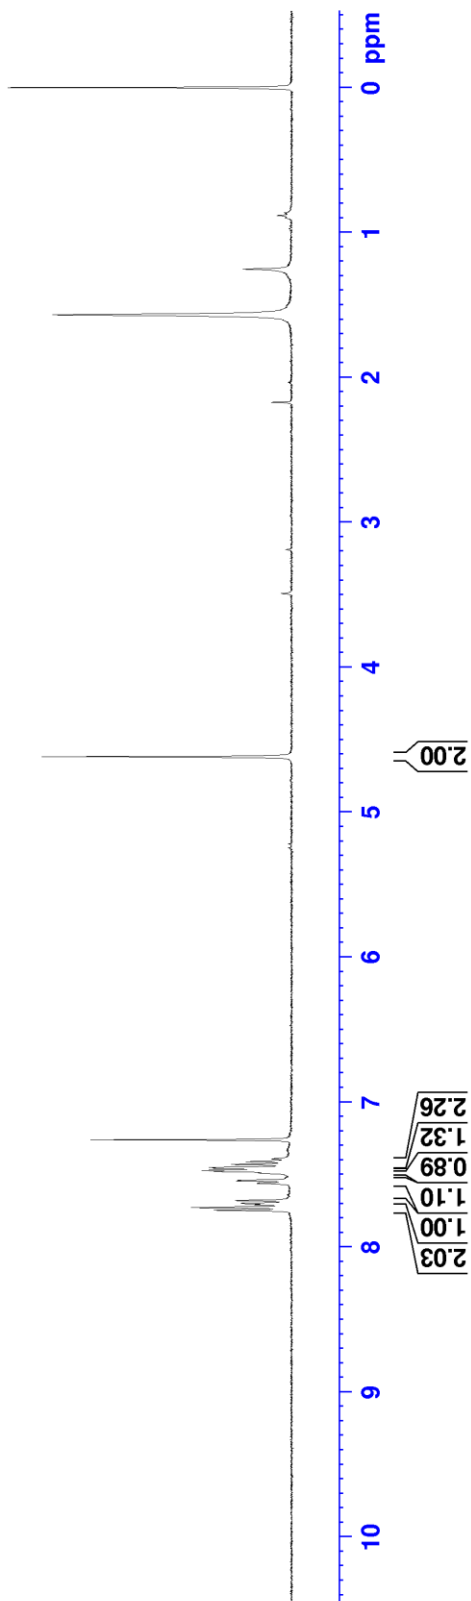

DYY-BSK050

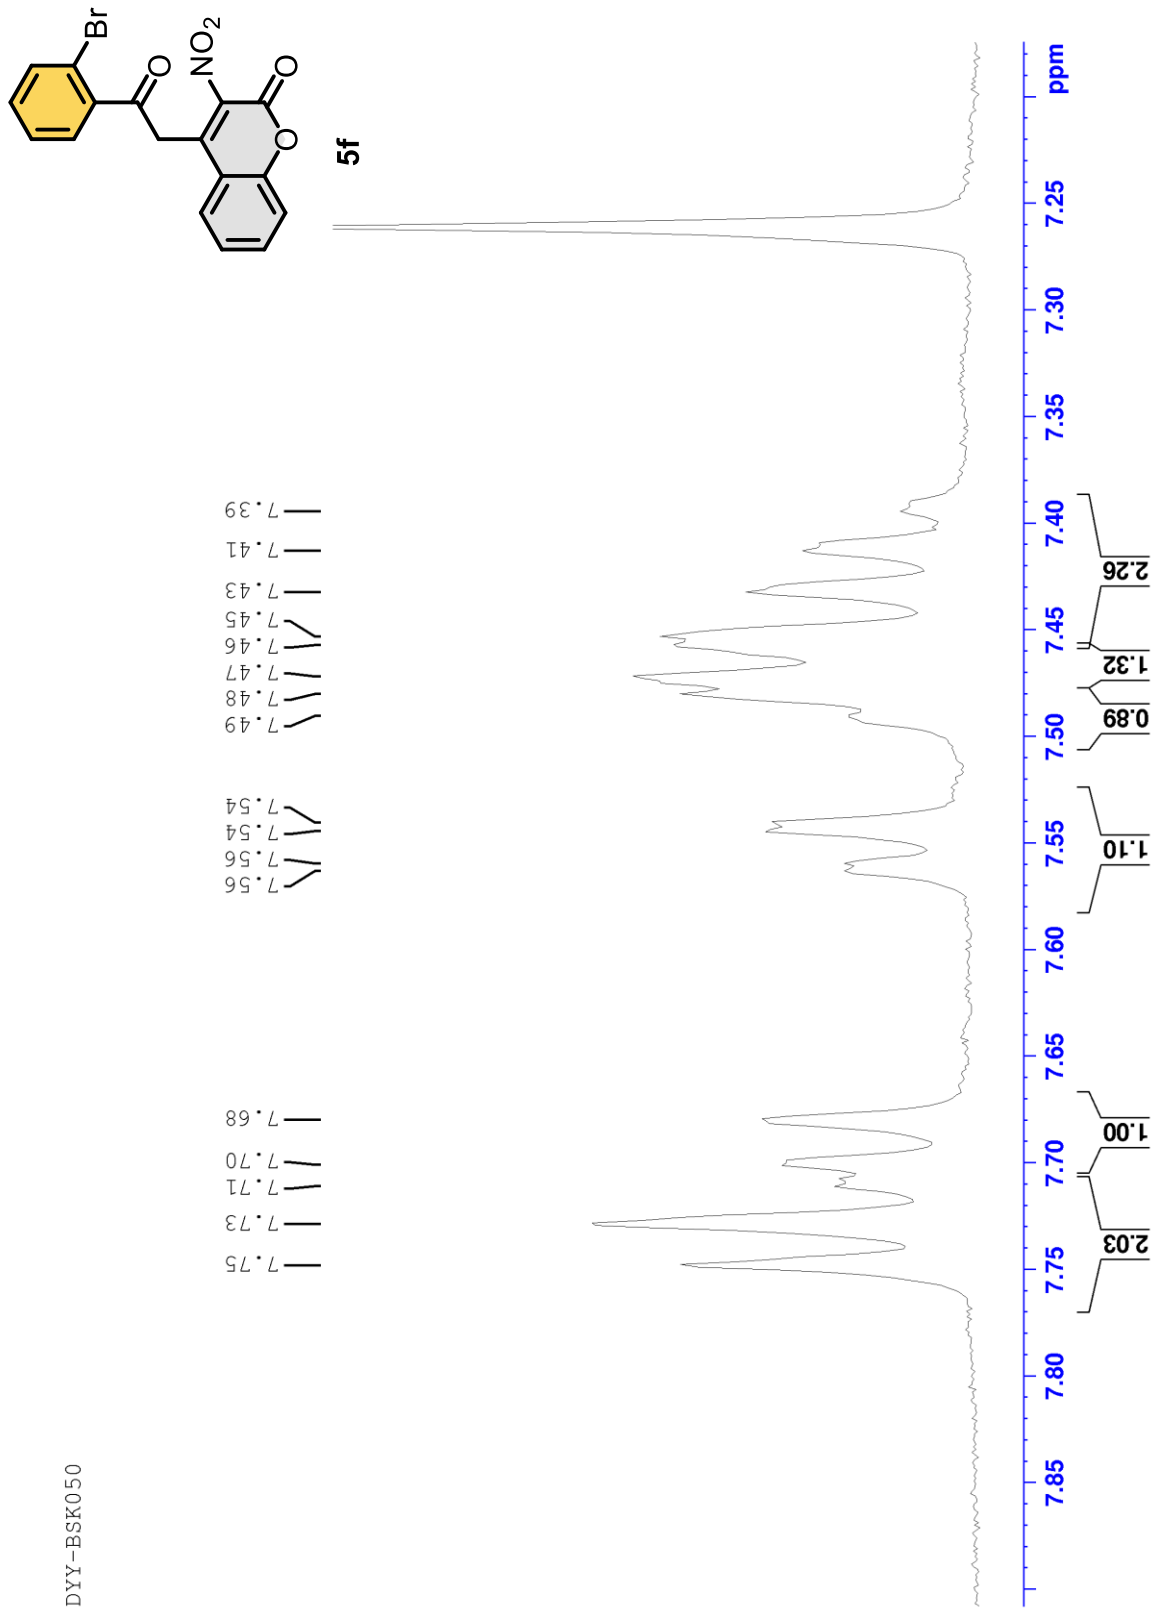

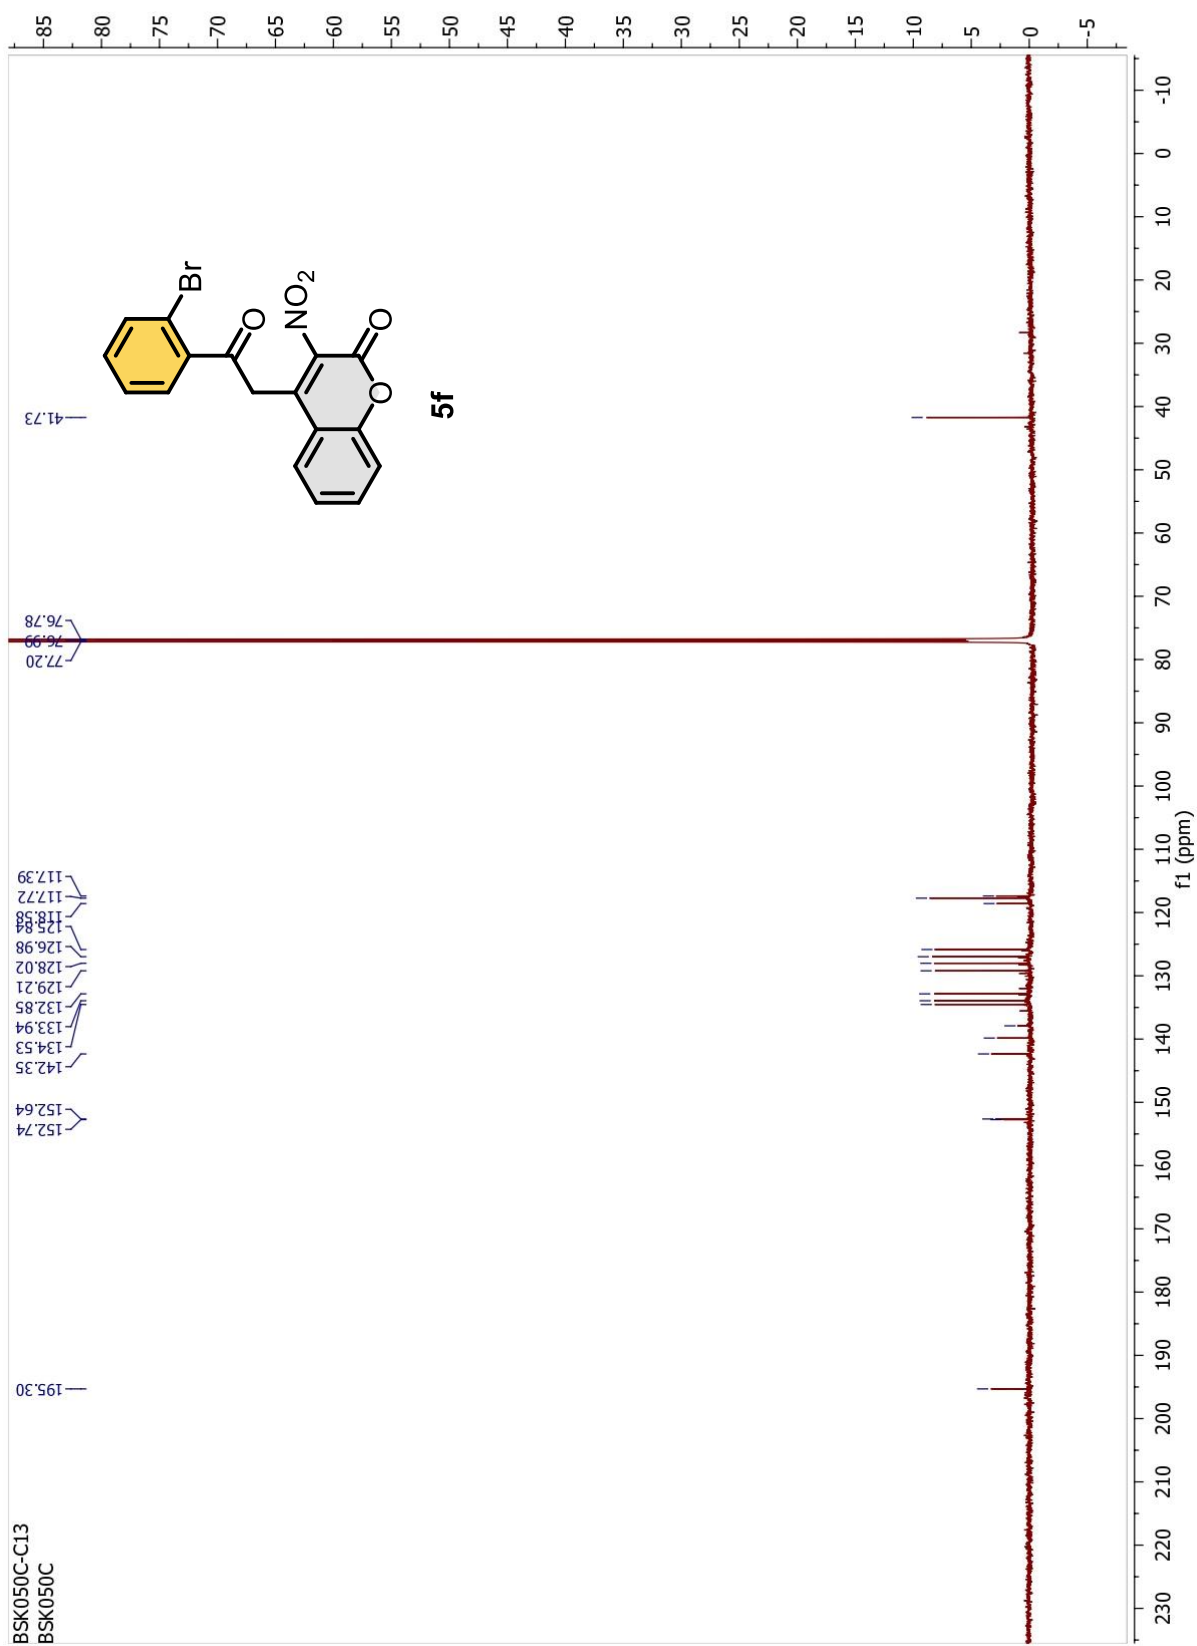

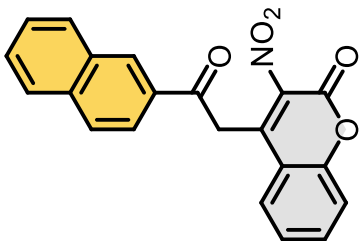

5g

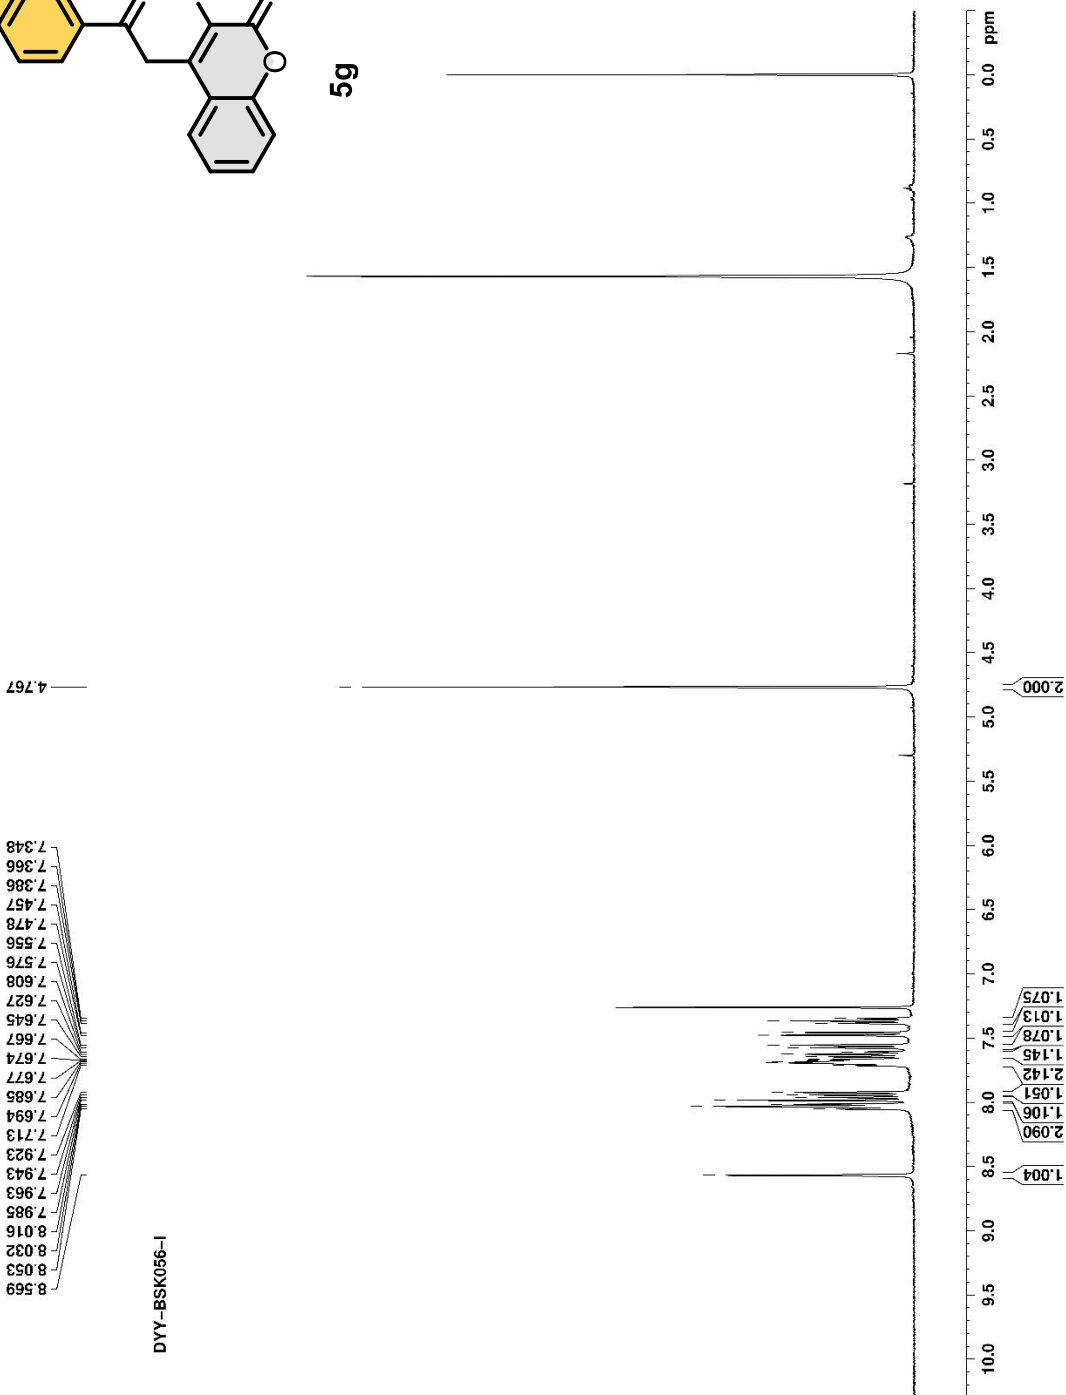

DYY-BSK056-I



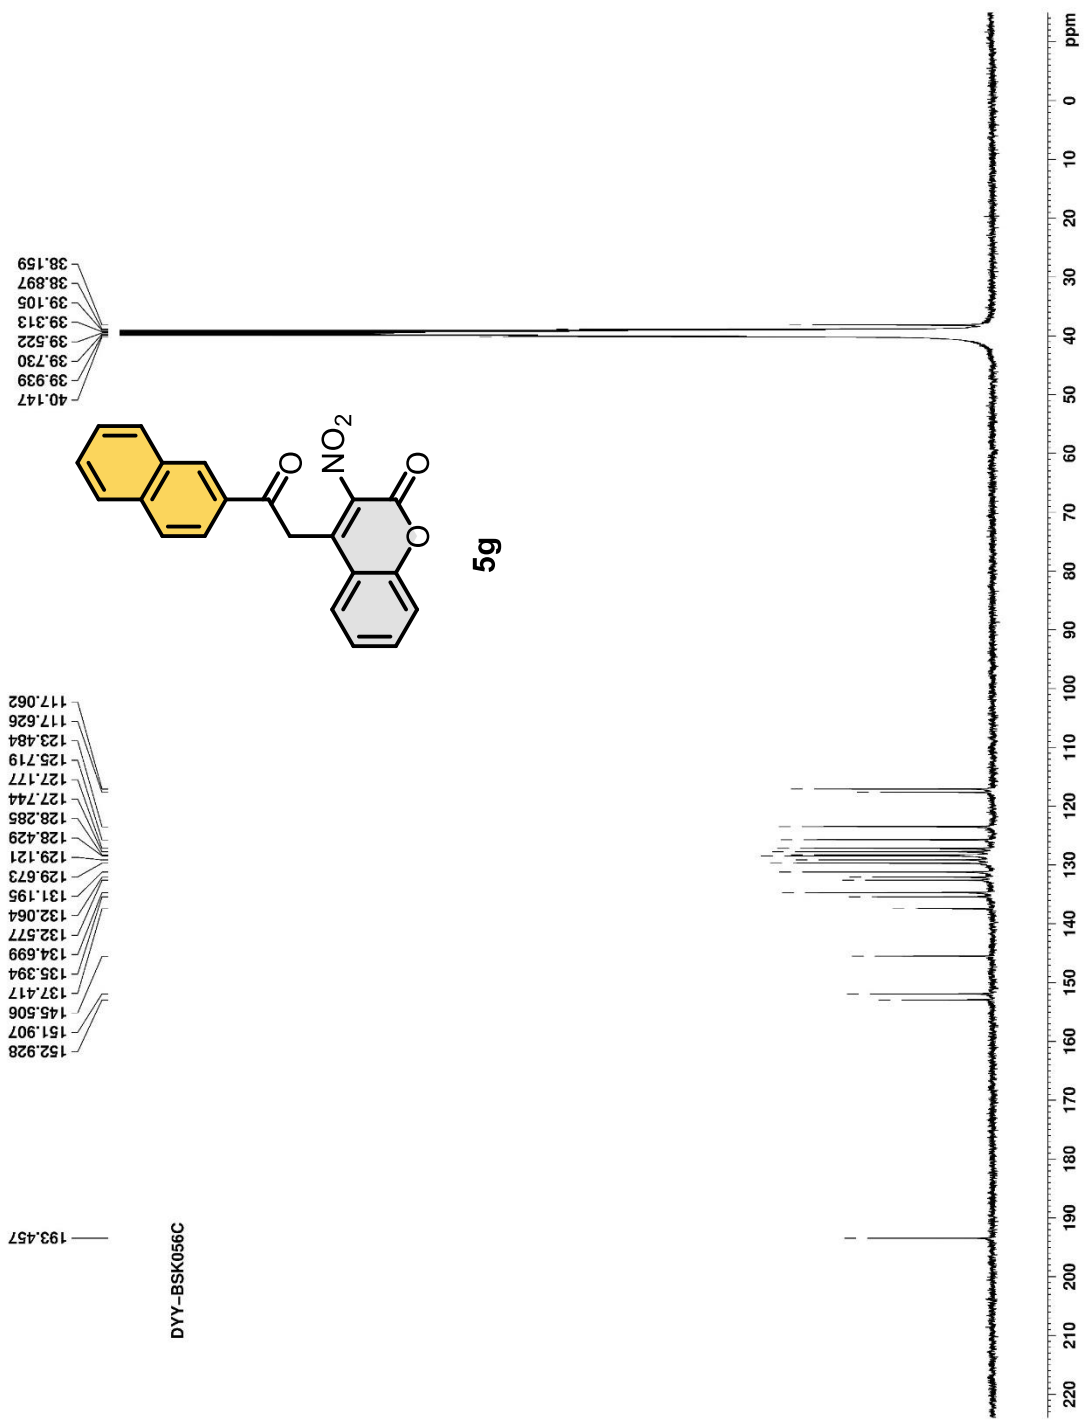

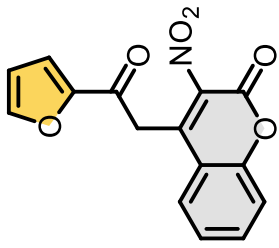

5h

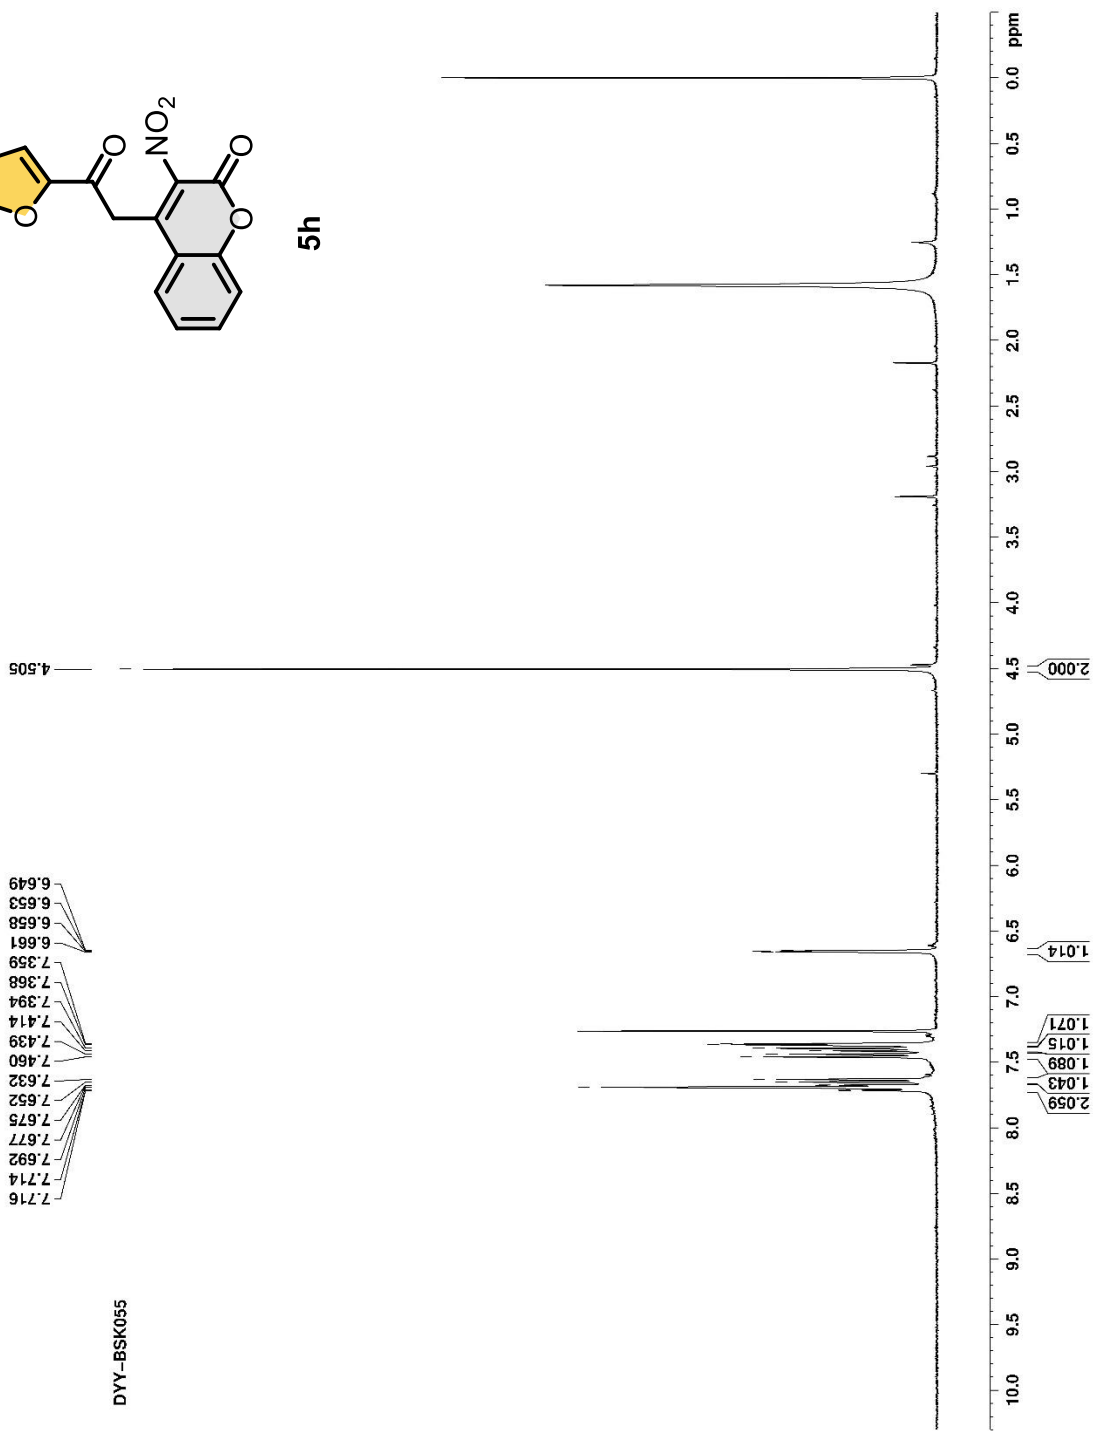

DYY-BSK055

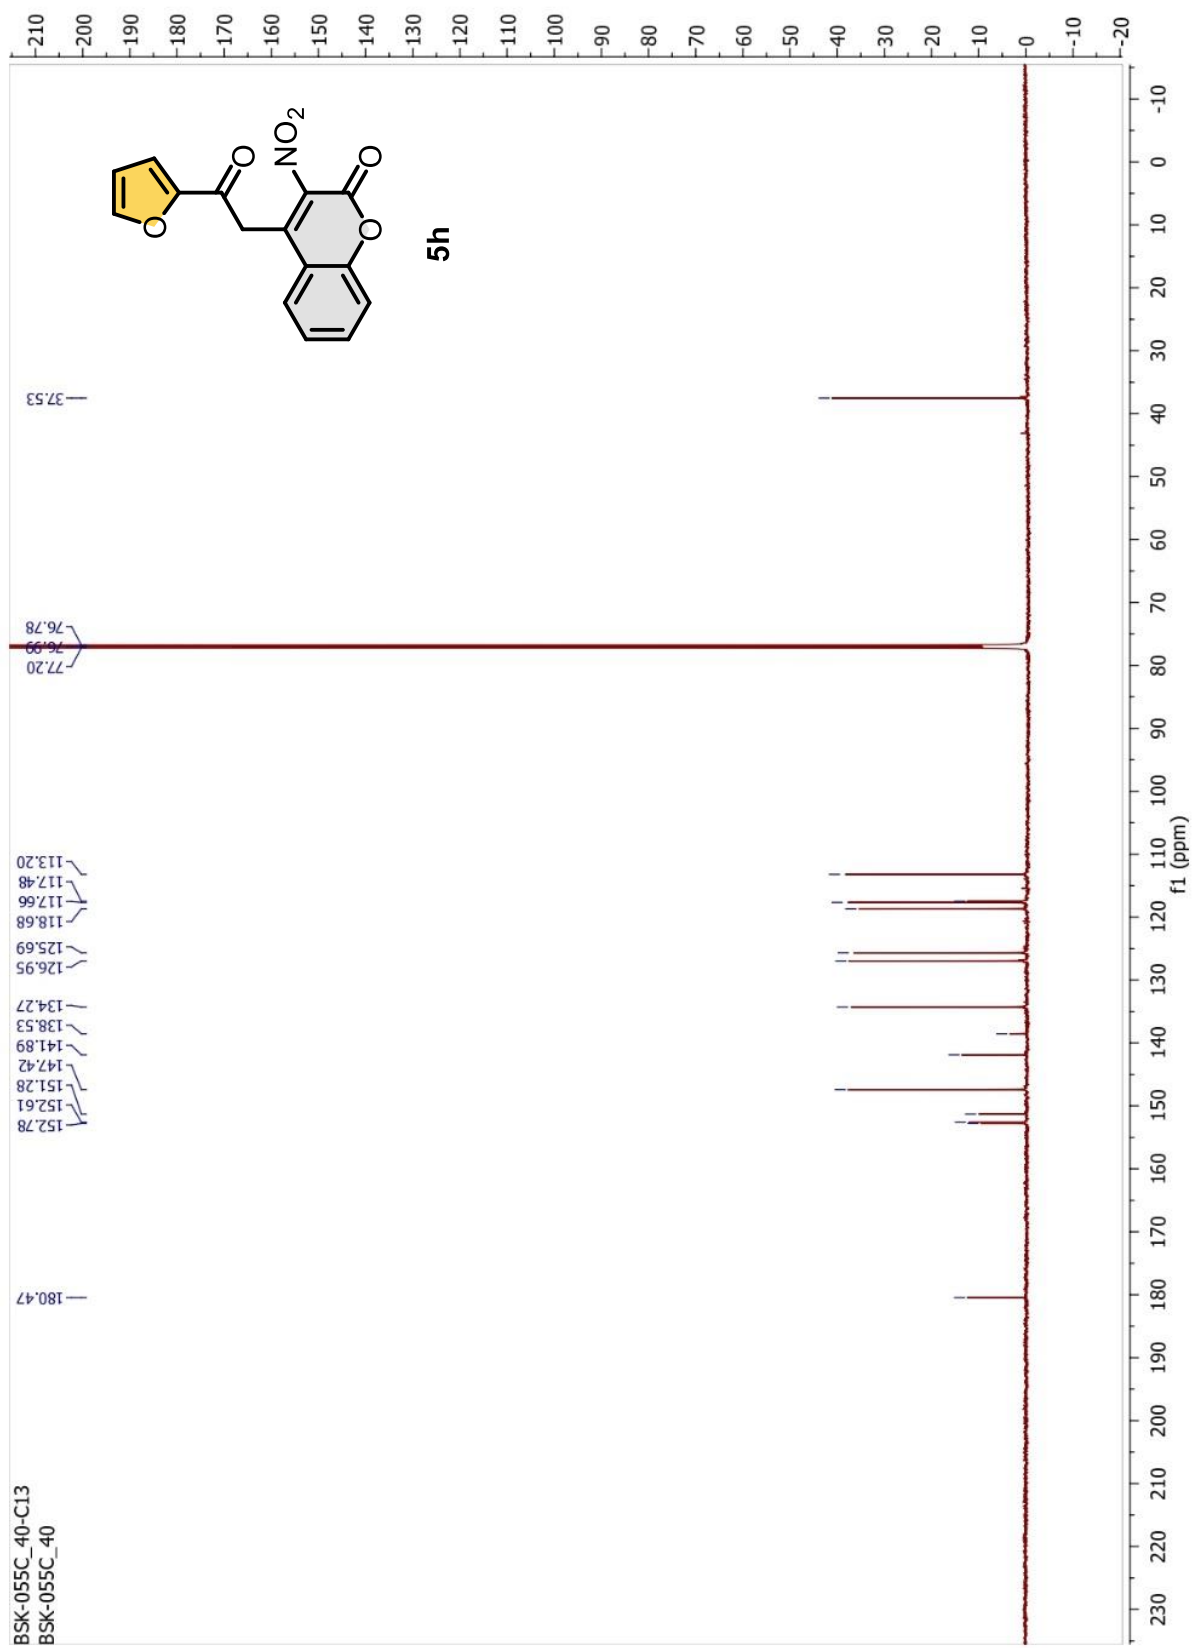

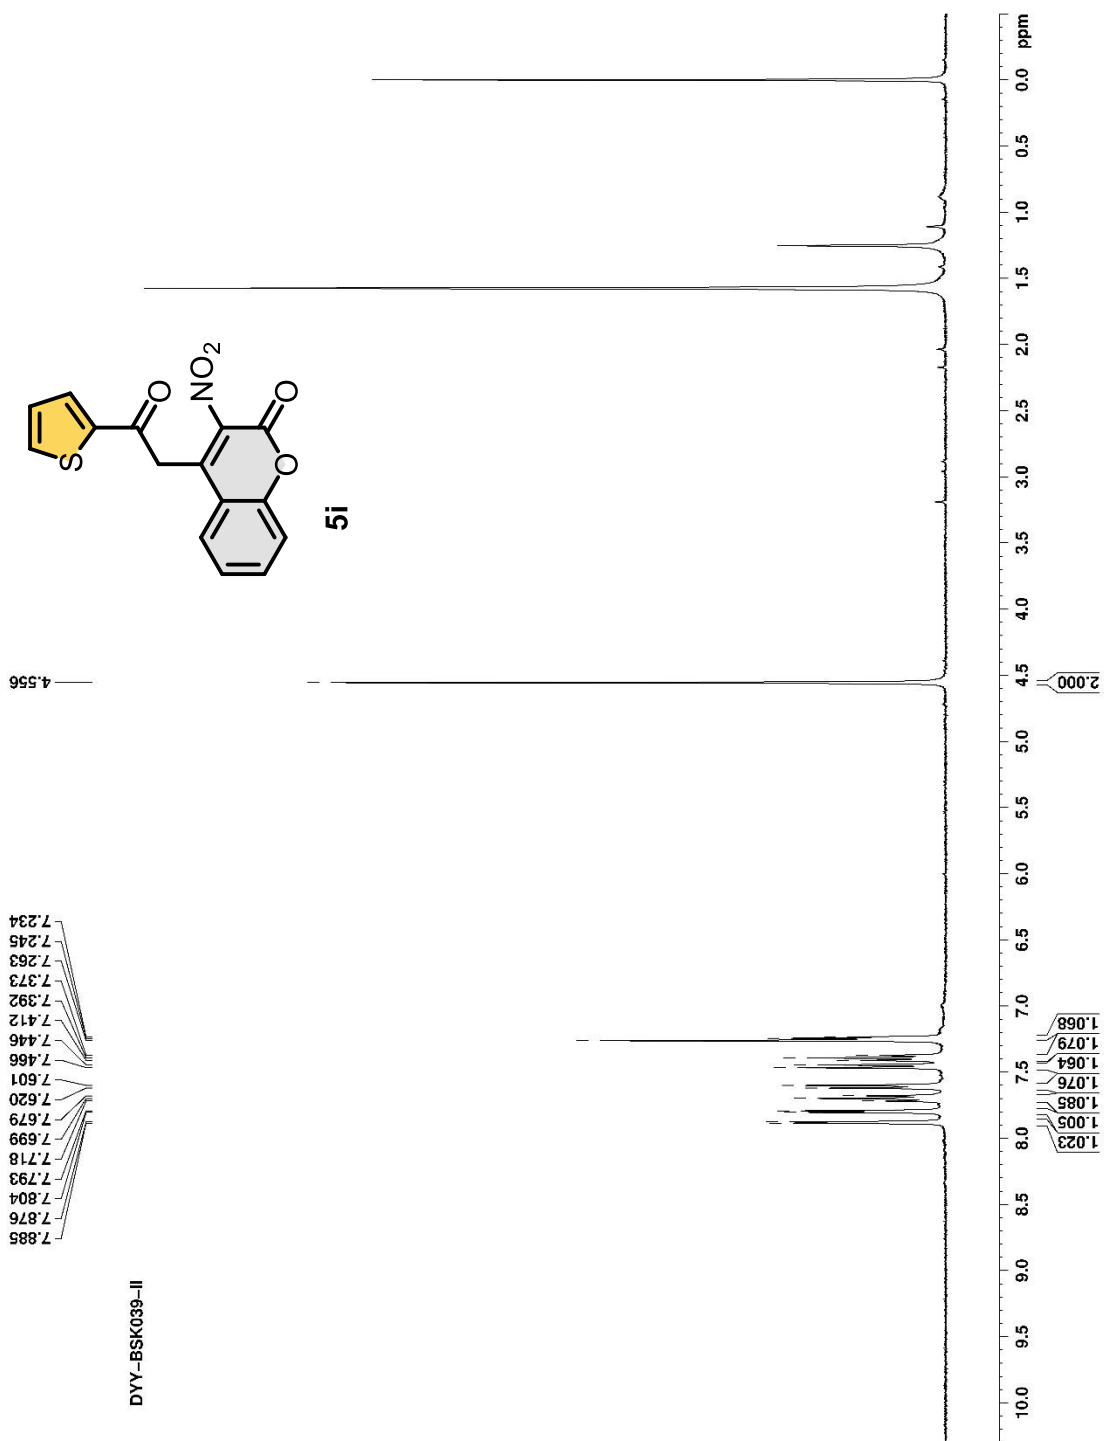

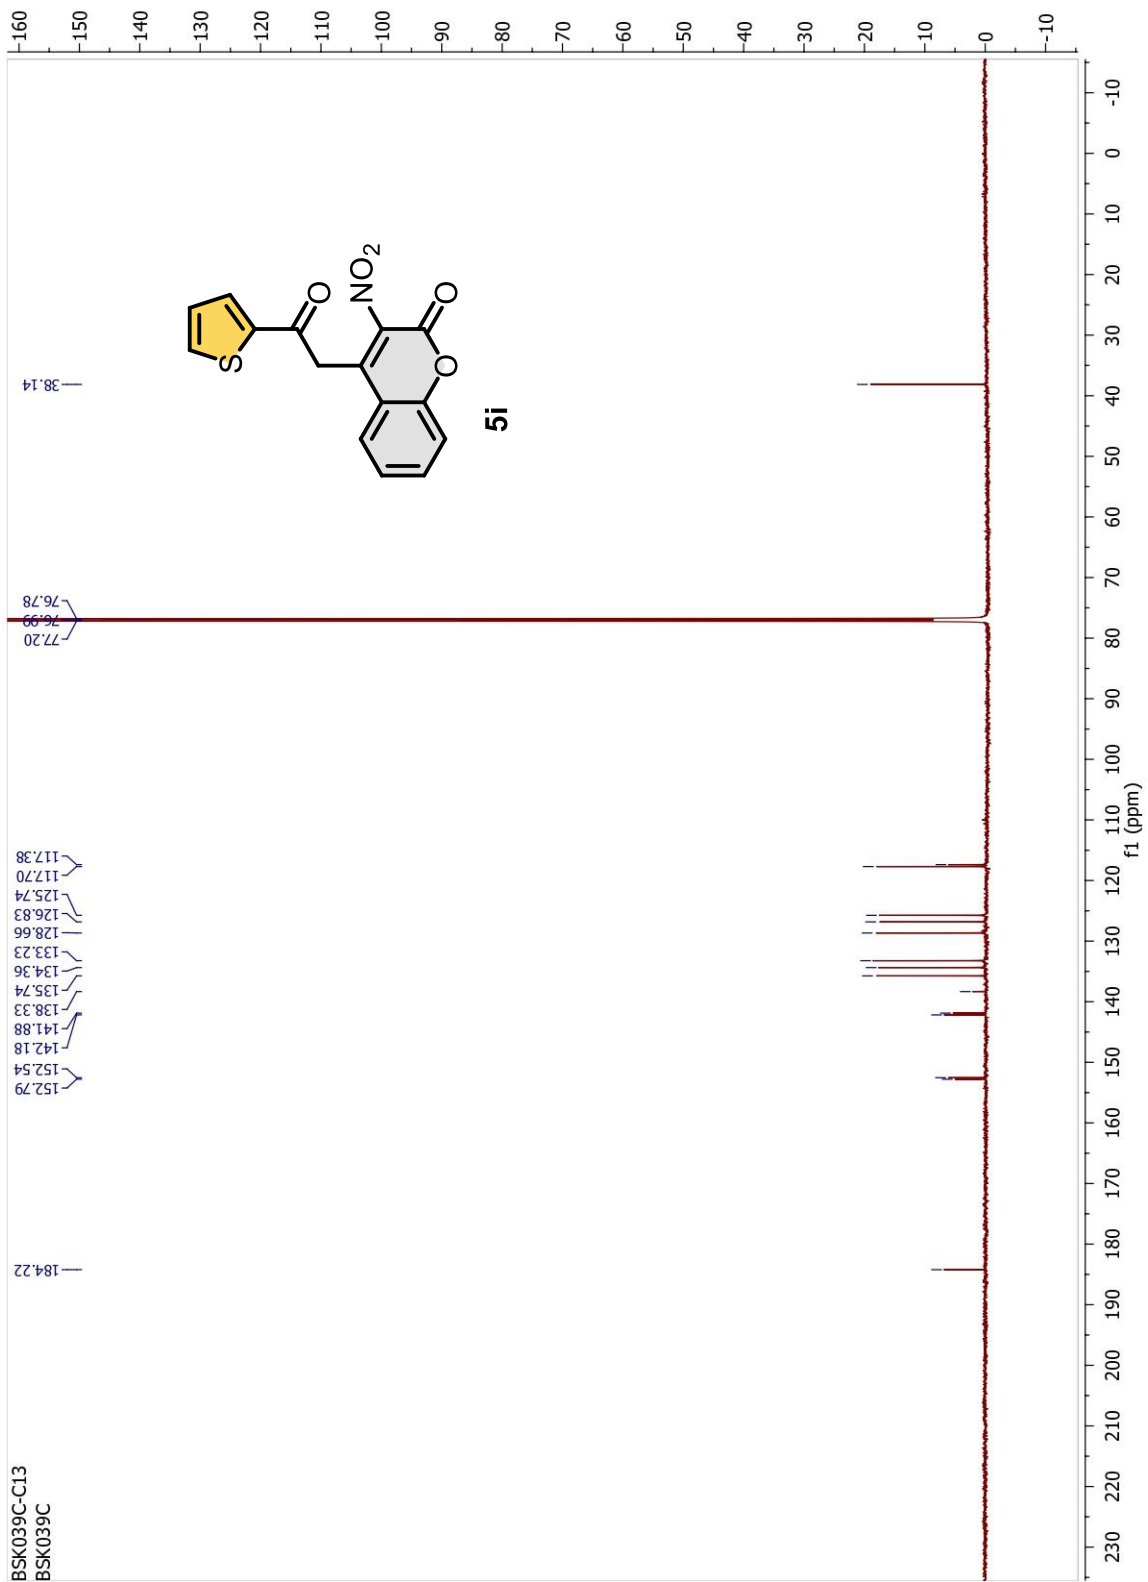

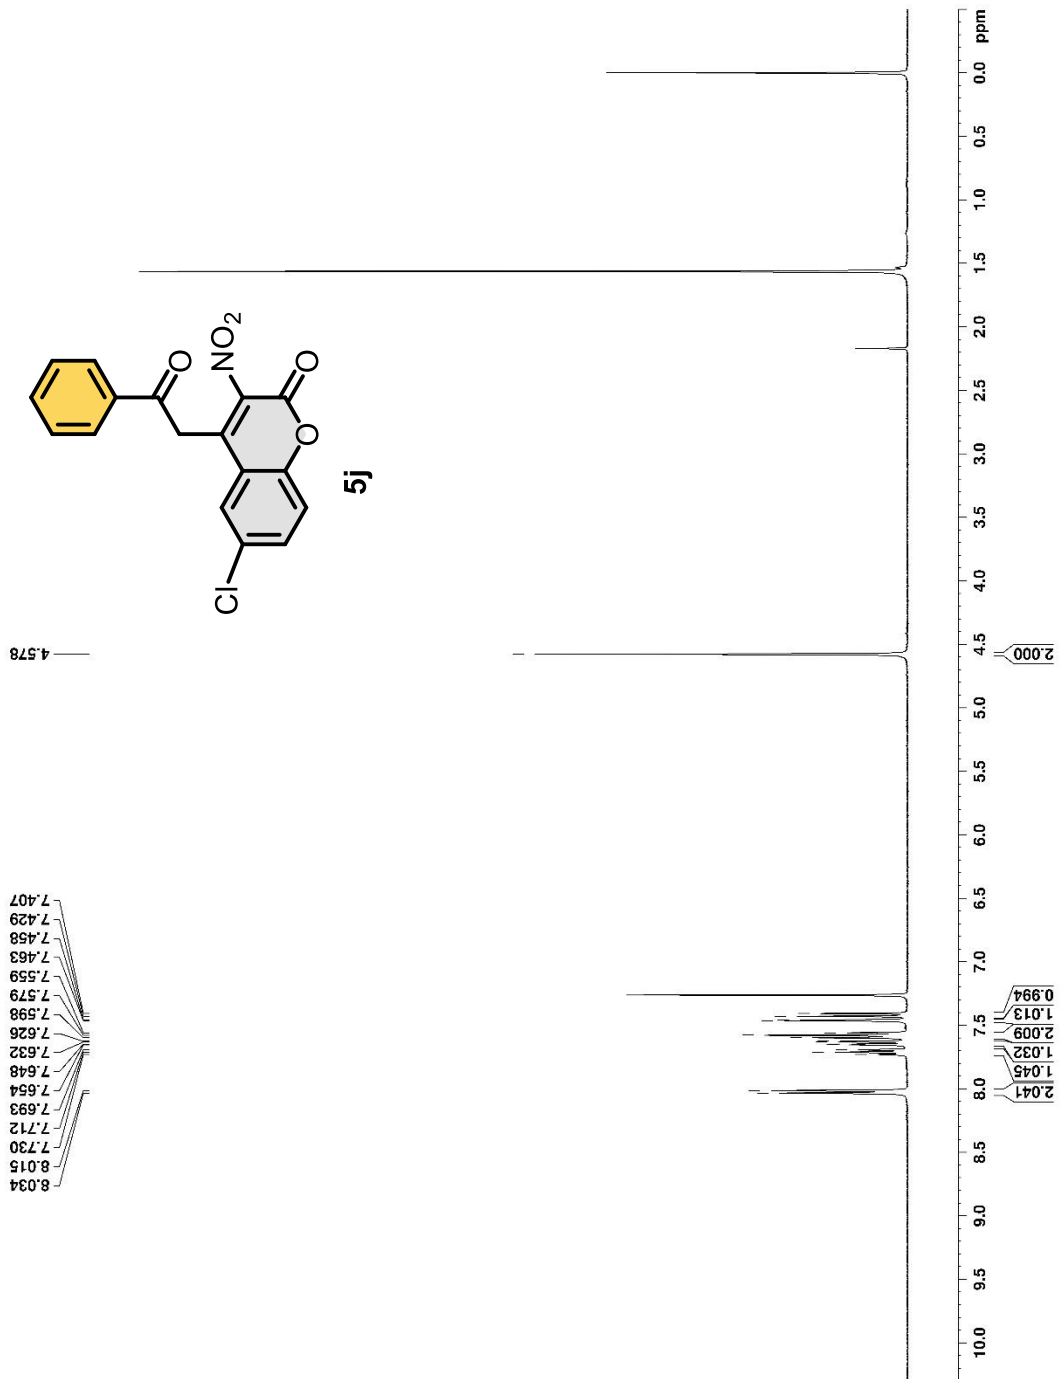

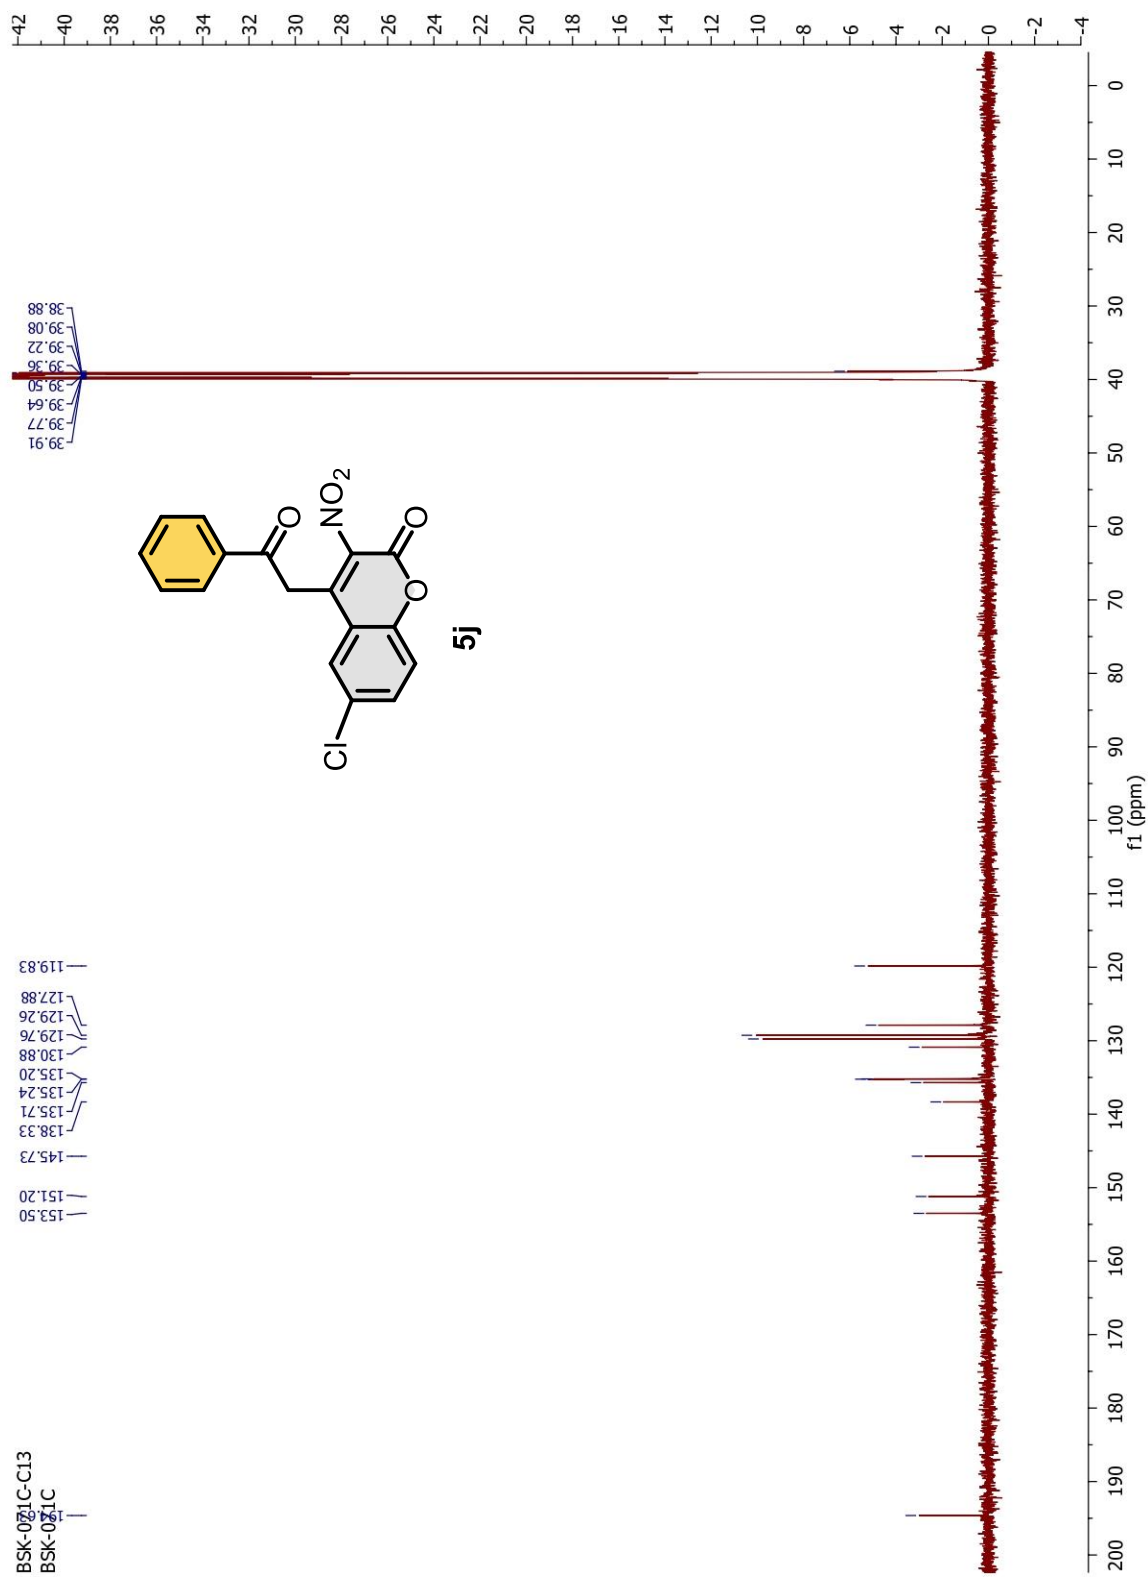

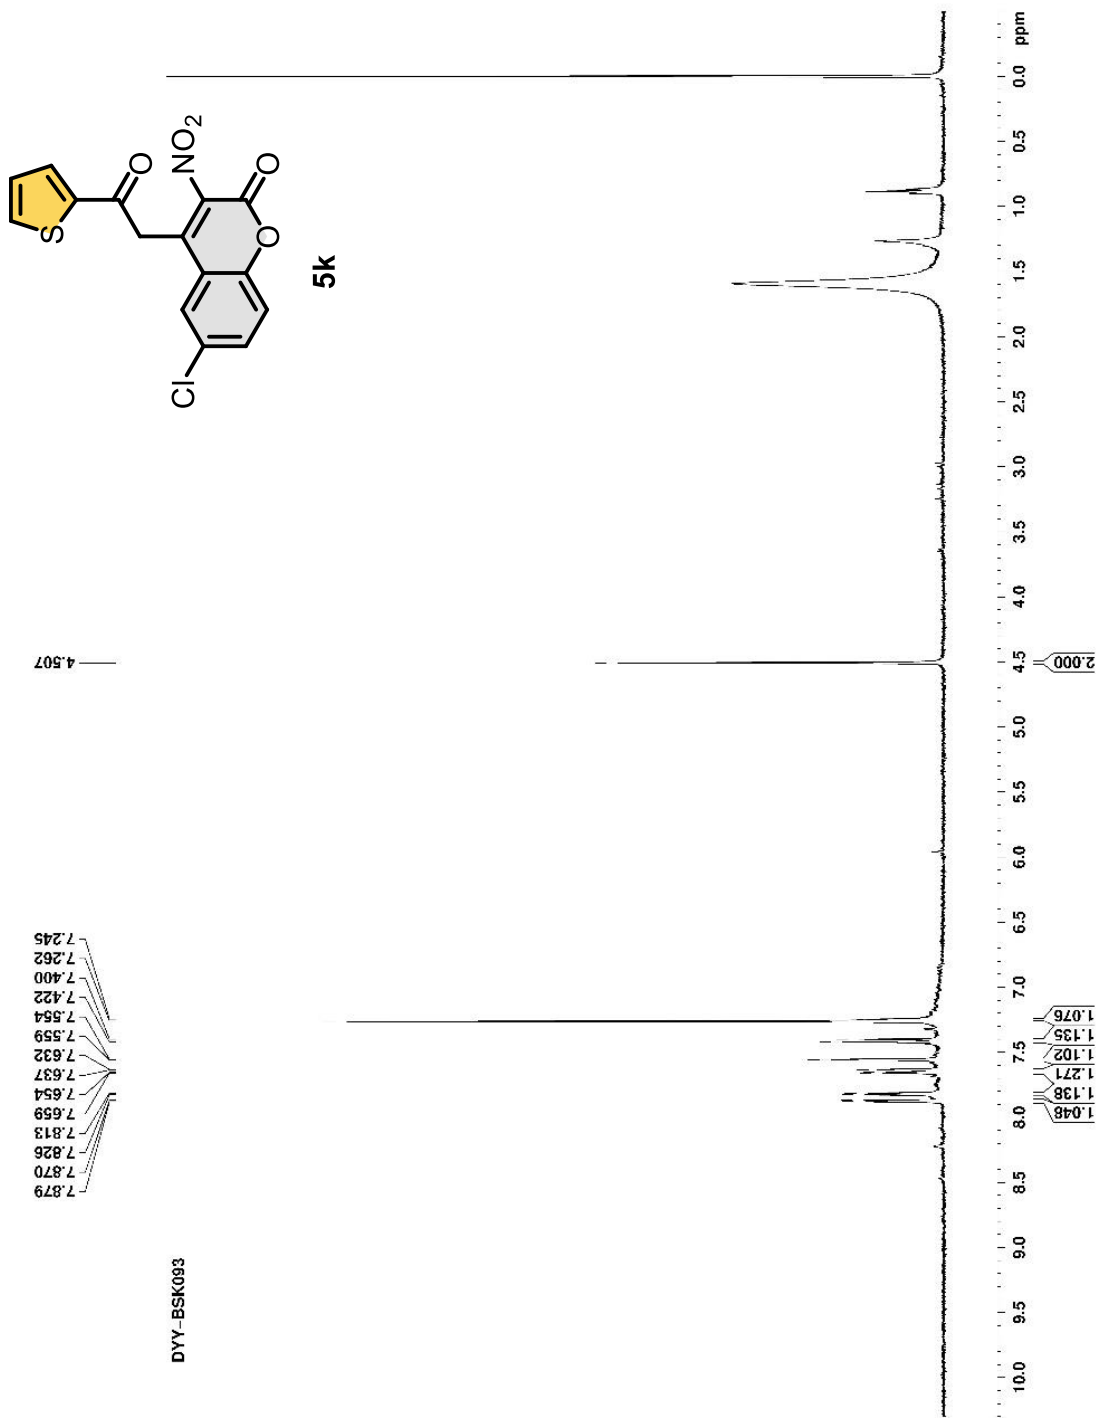



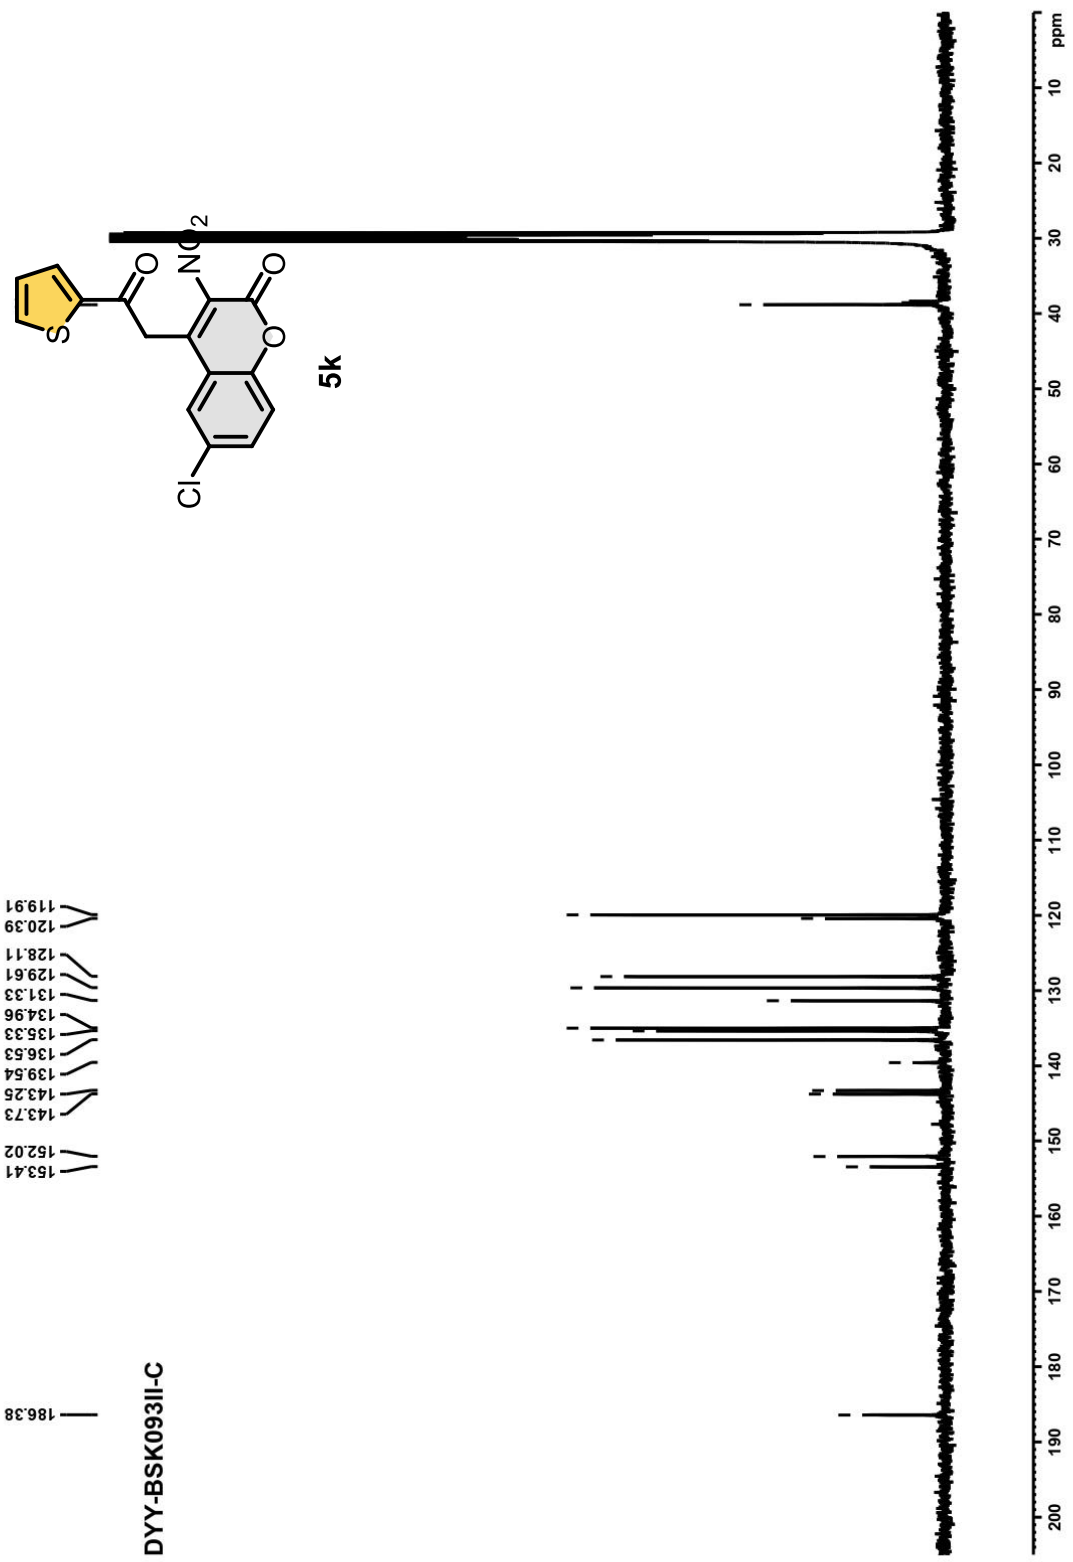

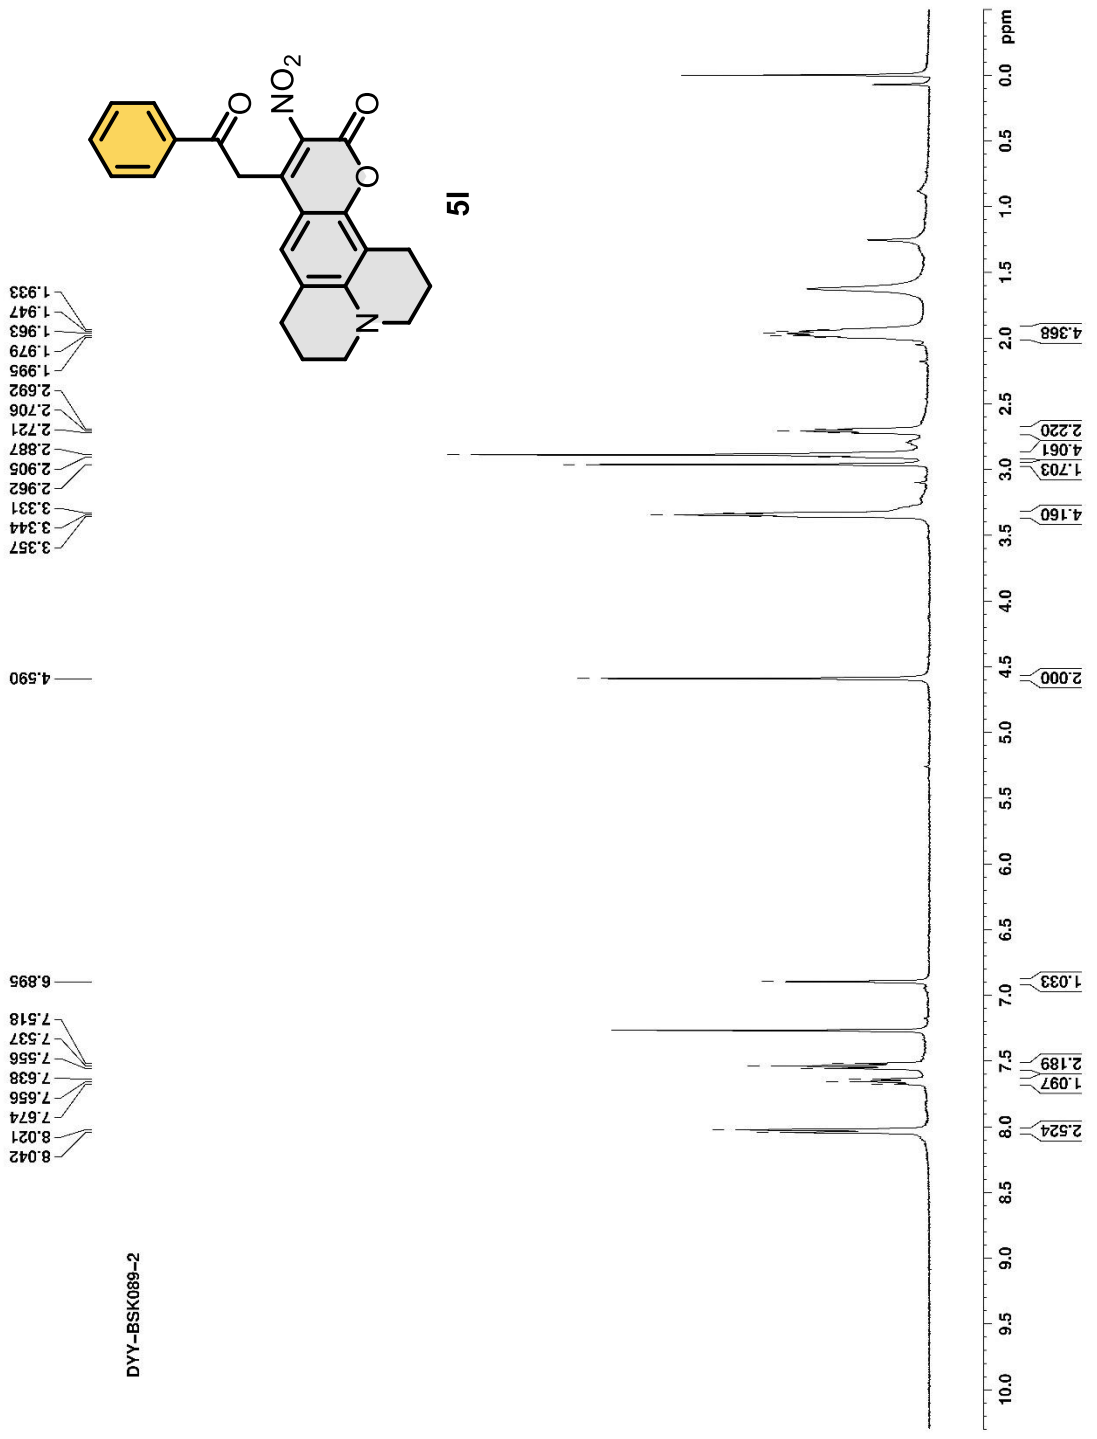

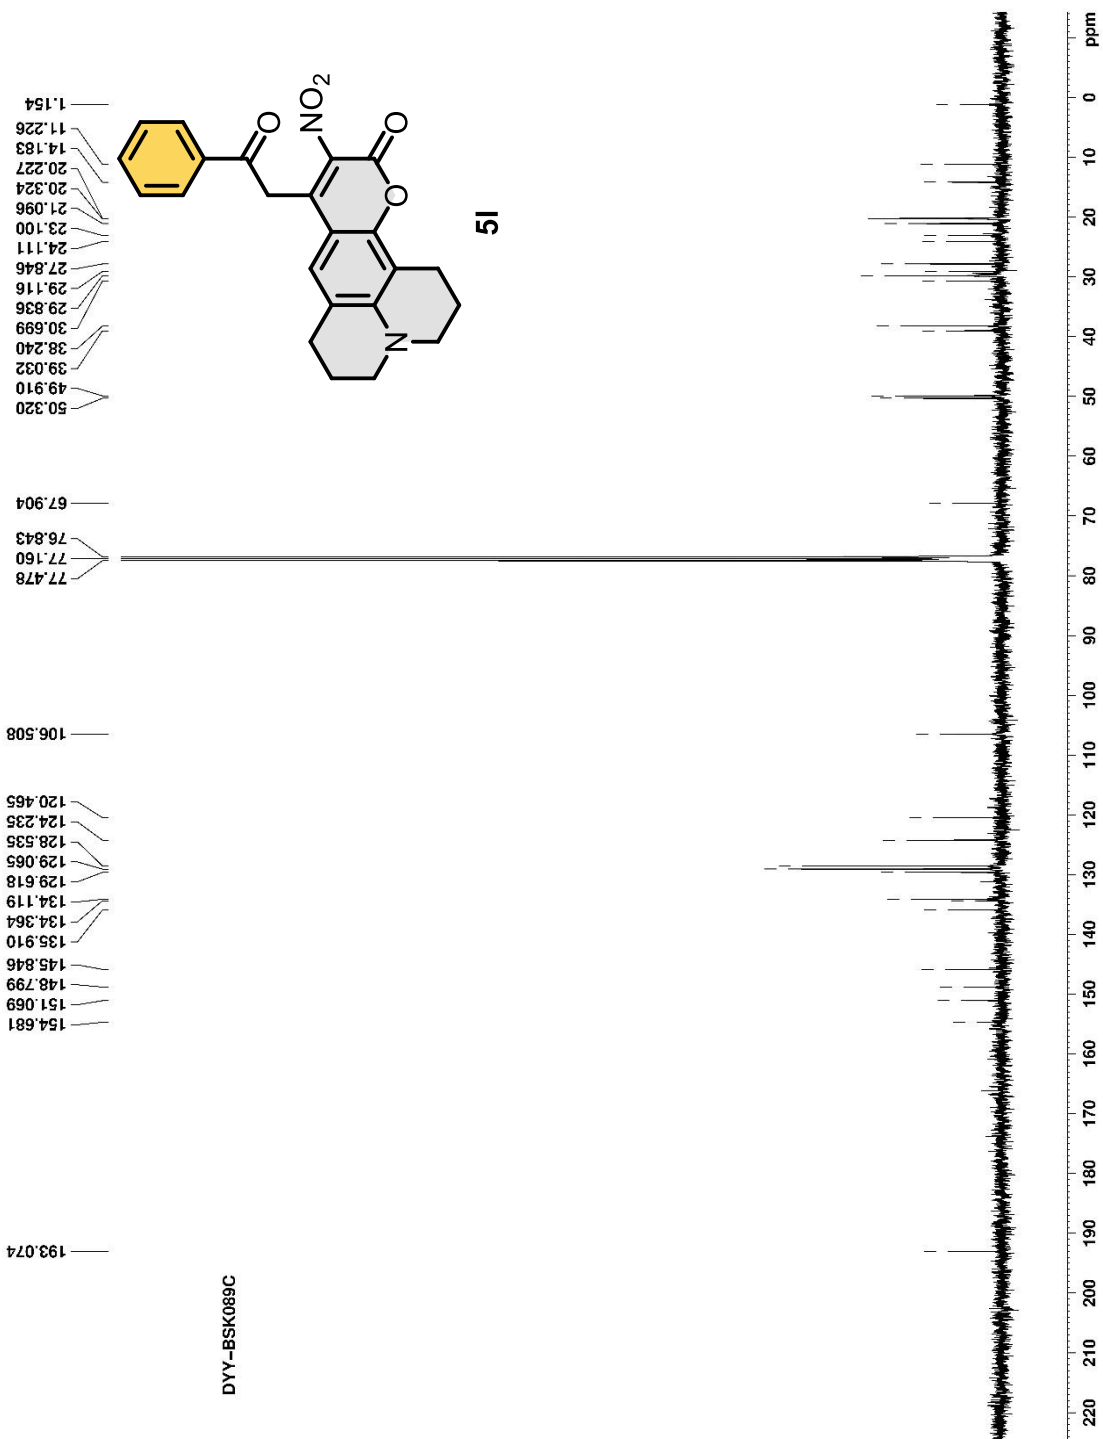

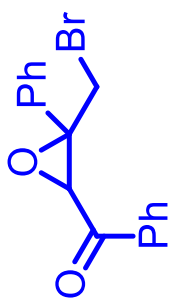

7

4.003  
3.975  
3.873  
3.845

4.622

7.908  
7.890  
7.584  
7.565  
7.547  
7.452  
7.433  
7.413  
7.366  
7.350  
7.341  
7.331  
7.225  
7.219  
7.211  
7.208  
7.199

DYY-BSK061-1-II

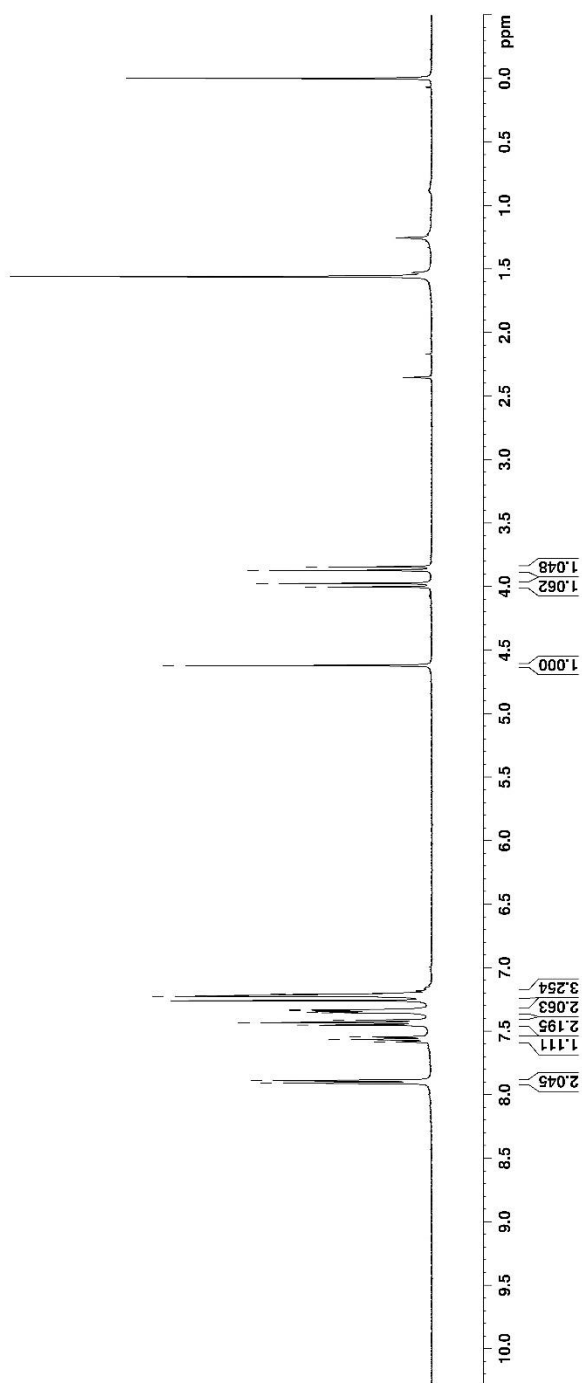

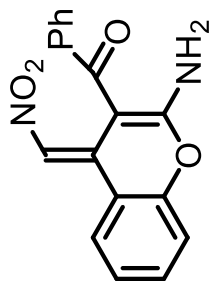

13

7.699  
7.696  
7.678  
7.675  
7.612  
7.594  
7.590  
7.568  
7.565  
7.437  
7.434  
7.418  
7.400  
7.382  
7.380  
7.357  
7.355  
7.338  
7.319  
7.301  
7.159

DYY-BSK018-II

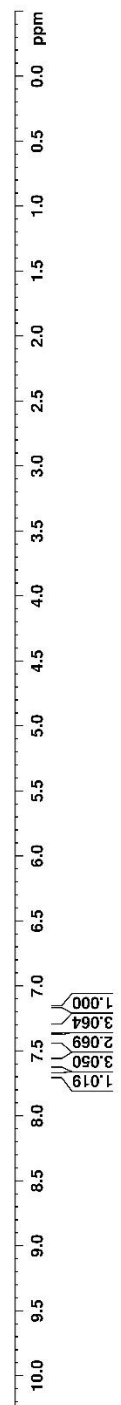

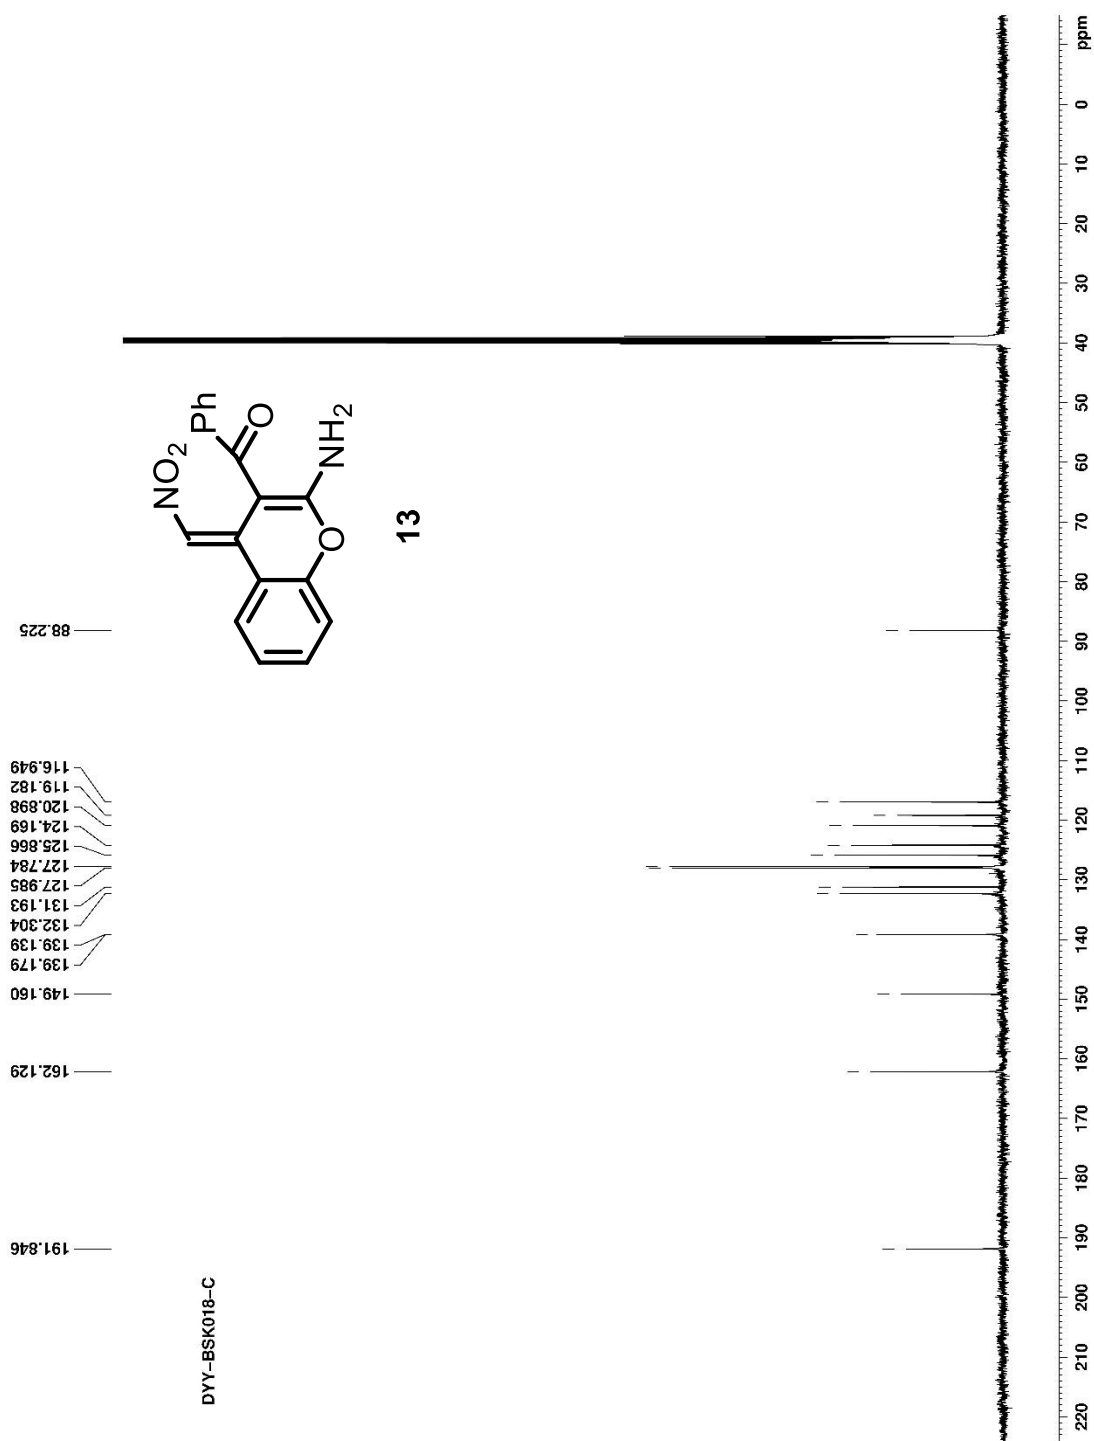

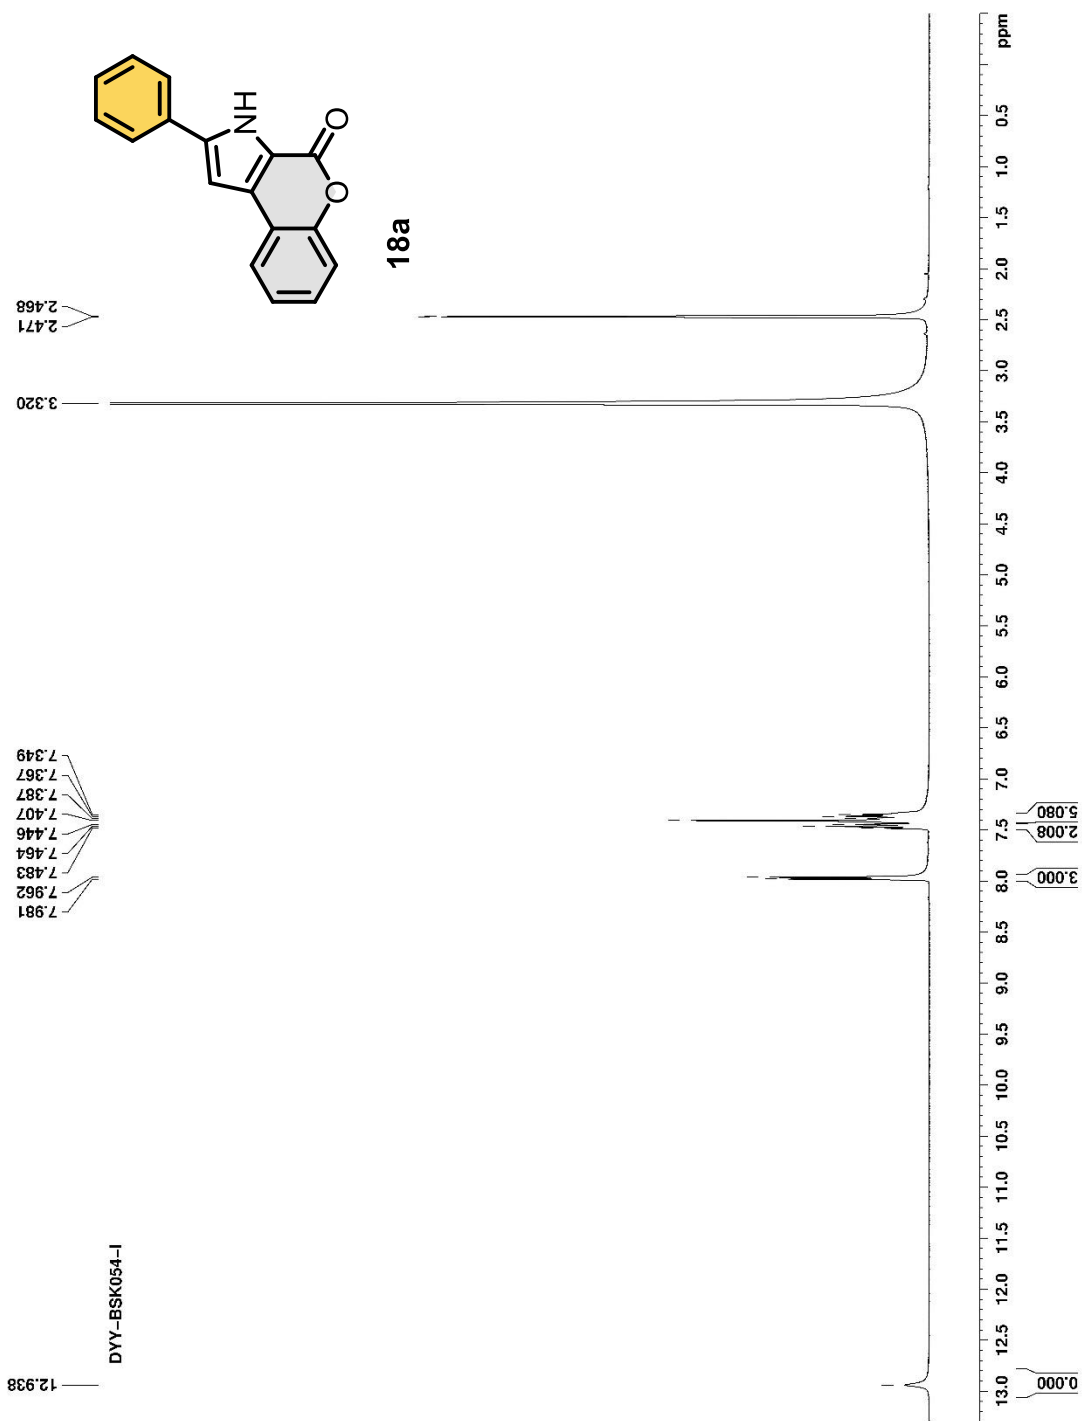

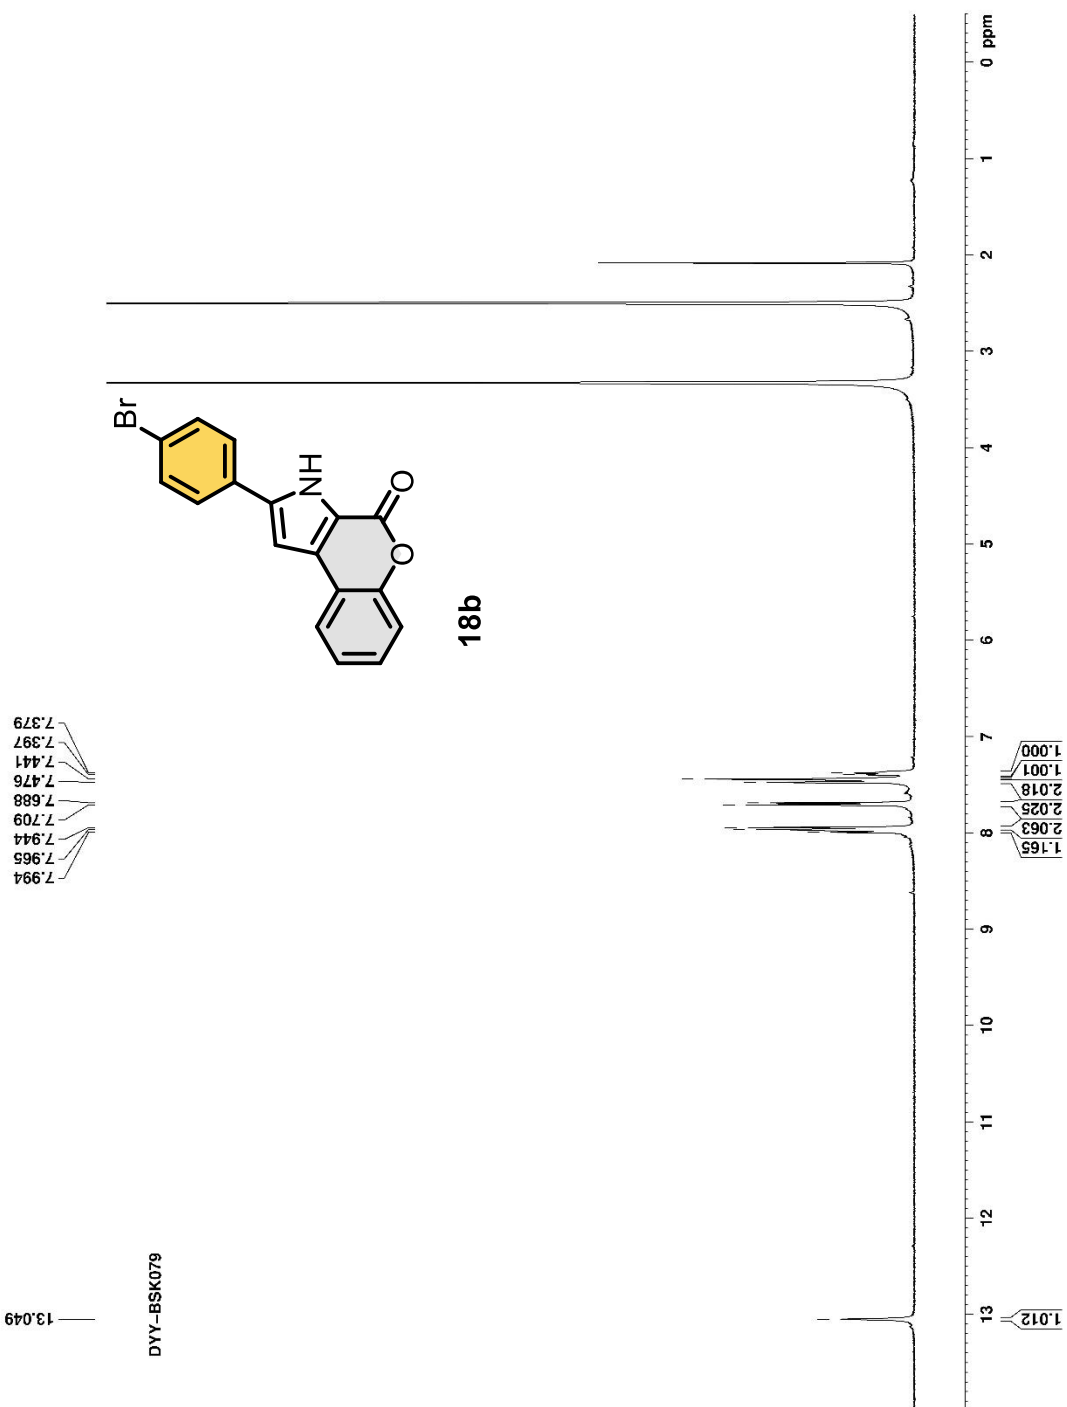



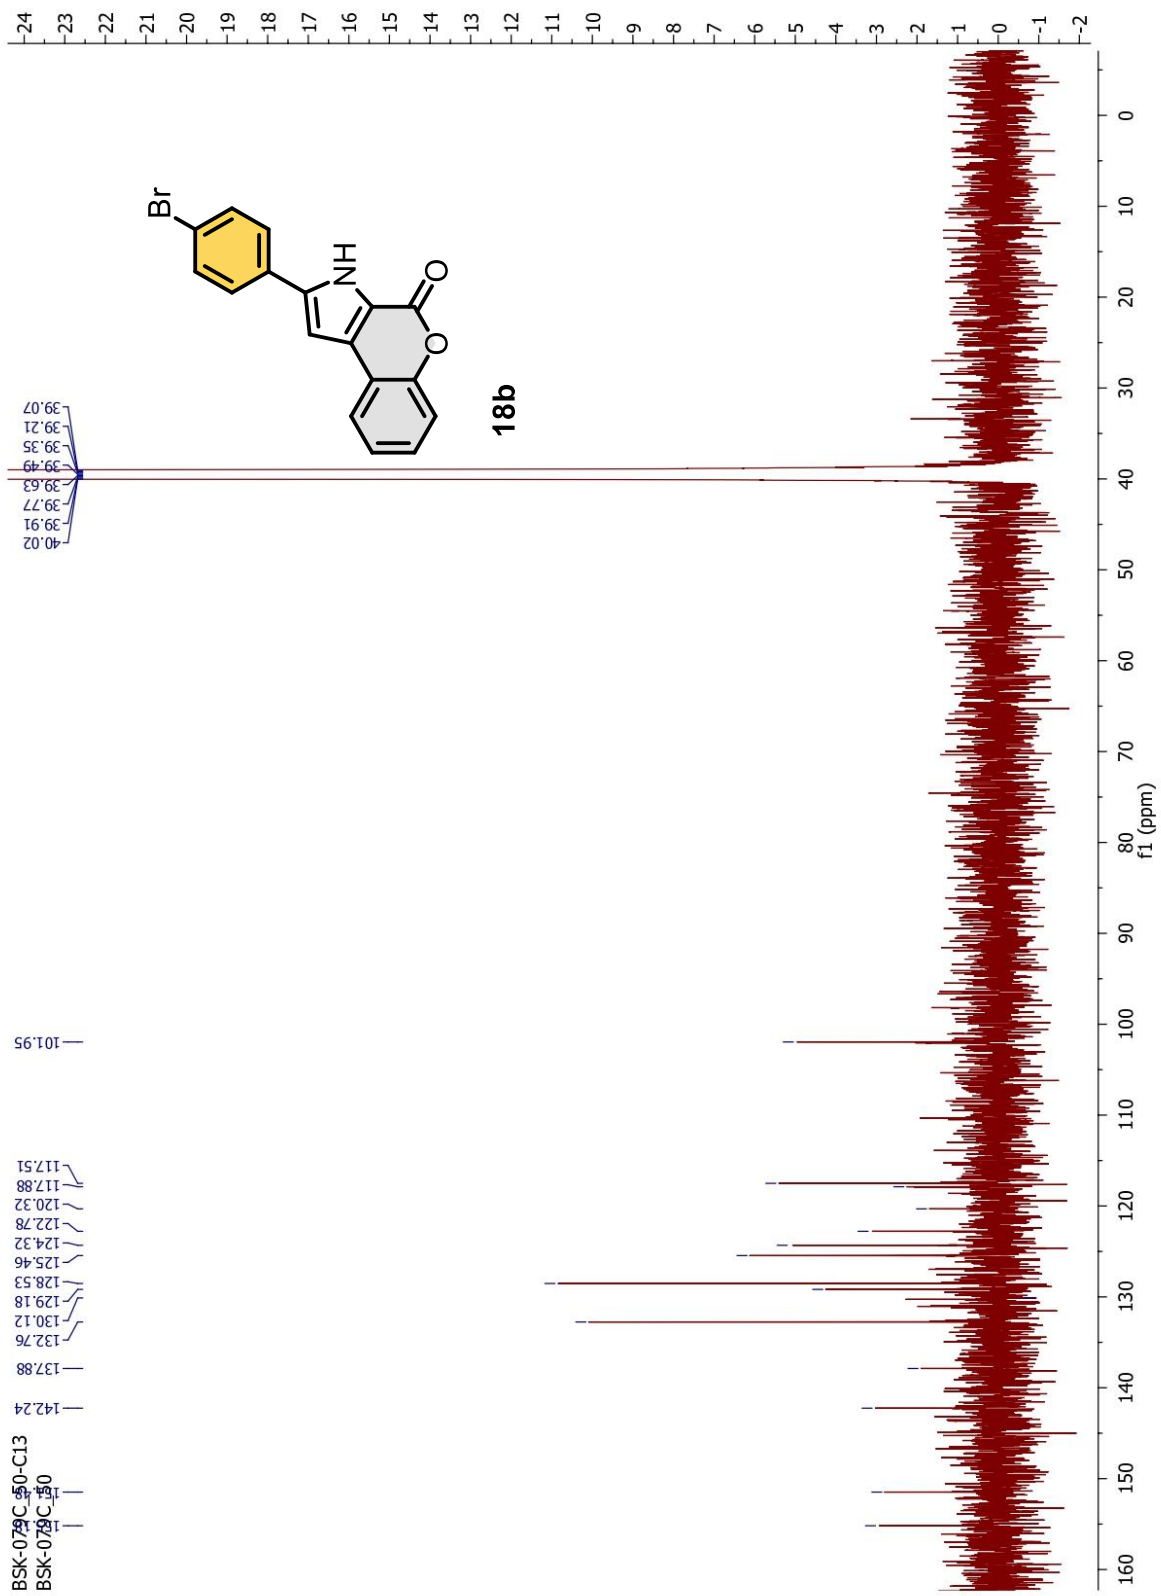

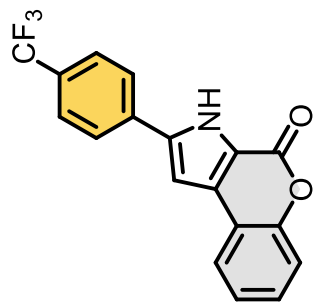

18c

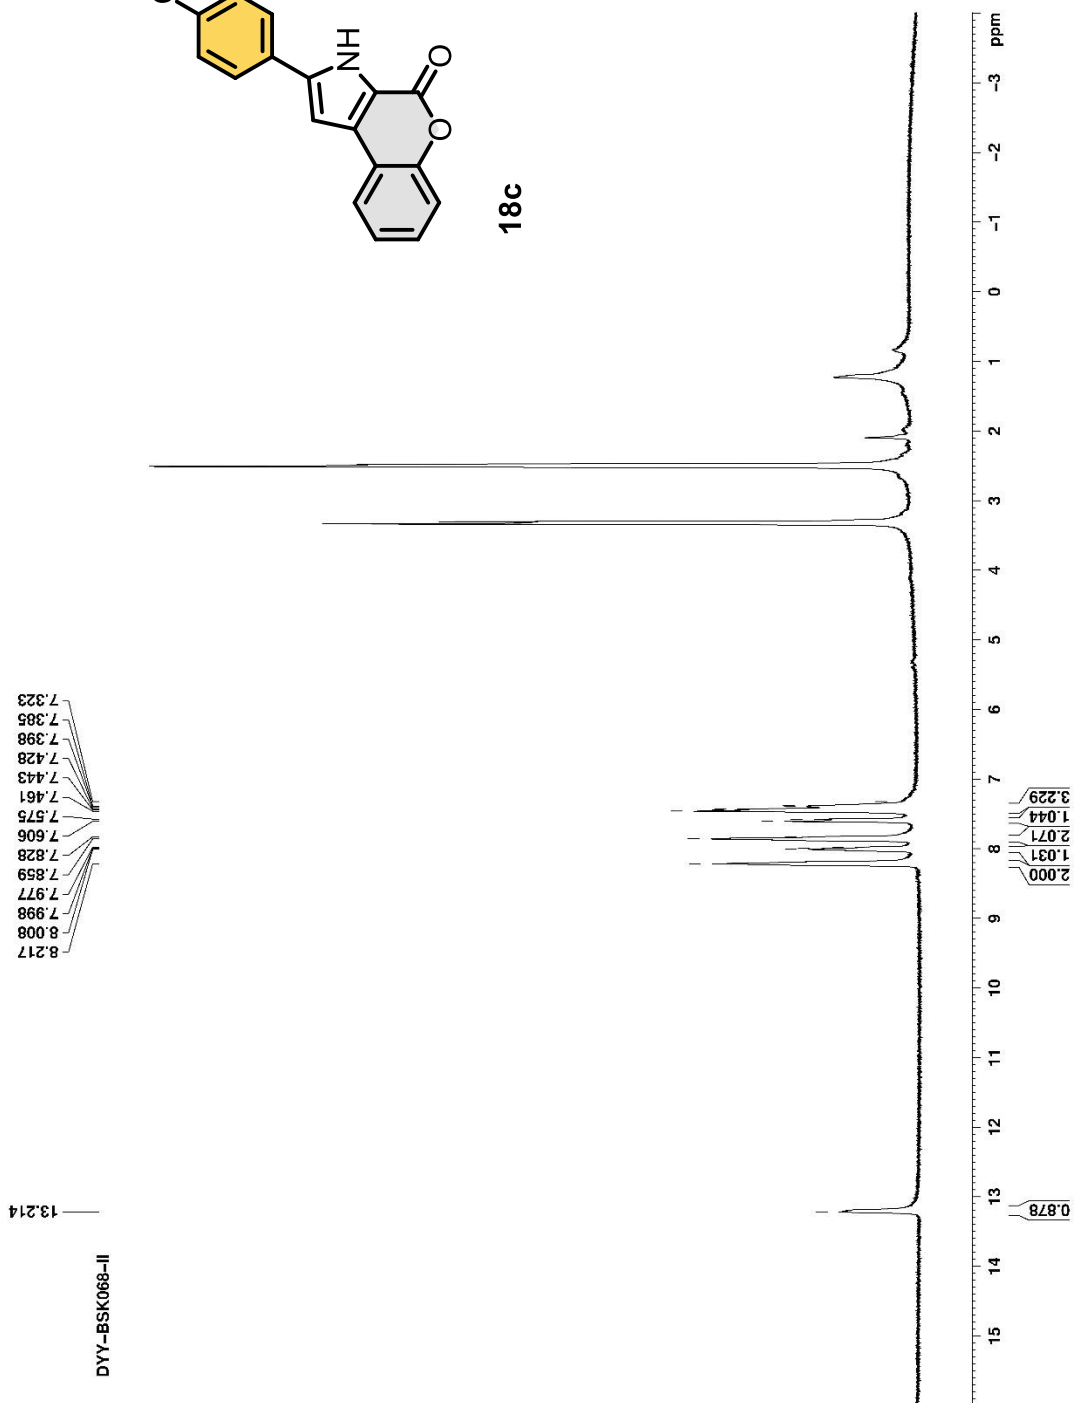

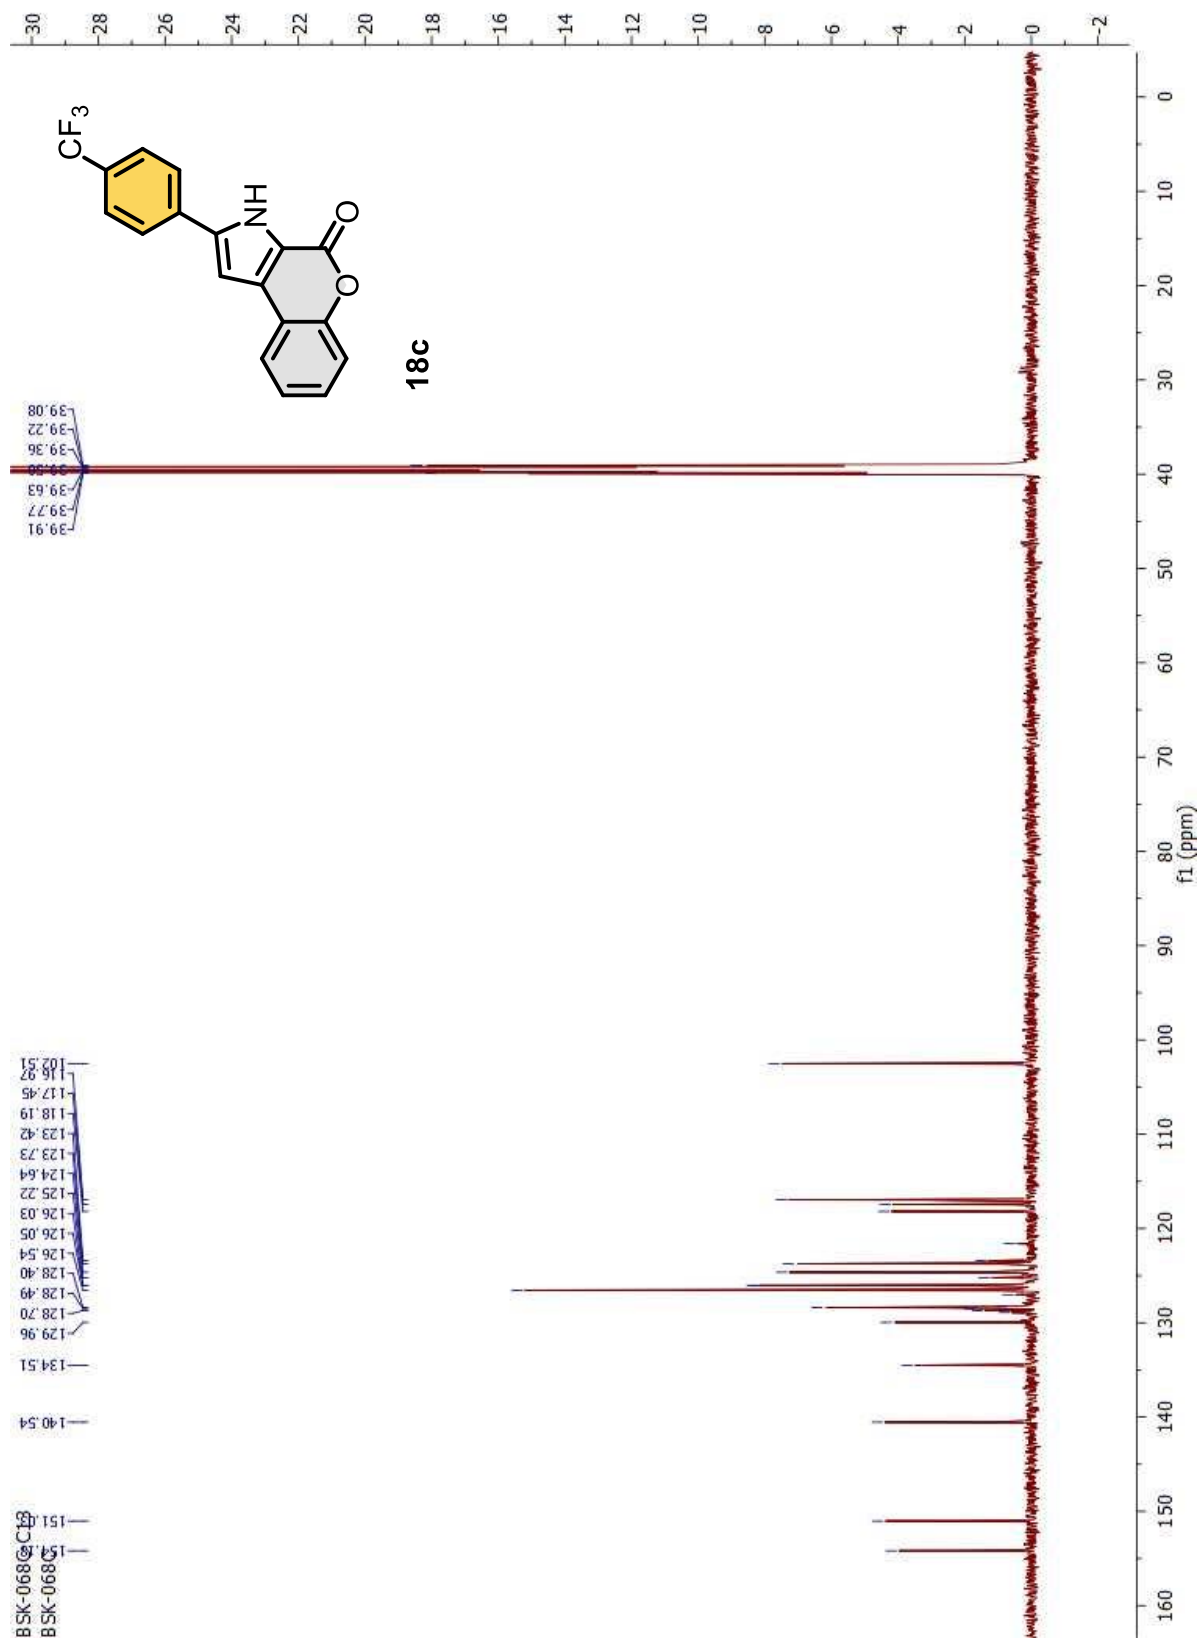

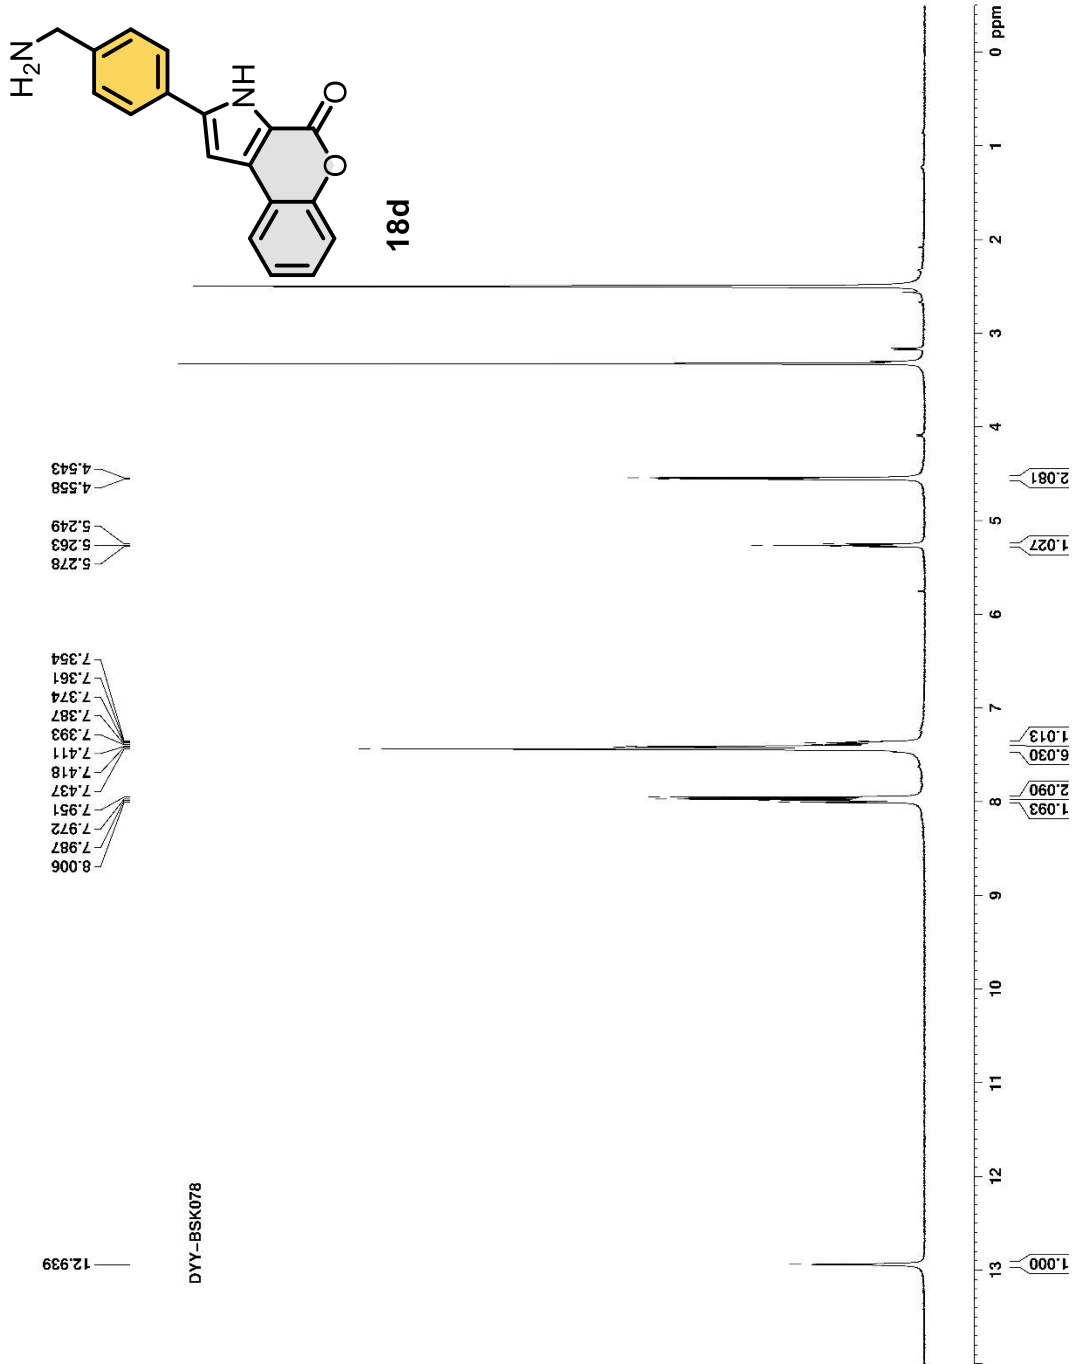

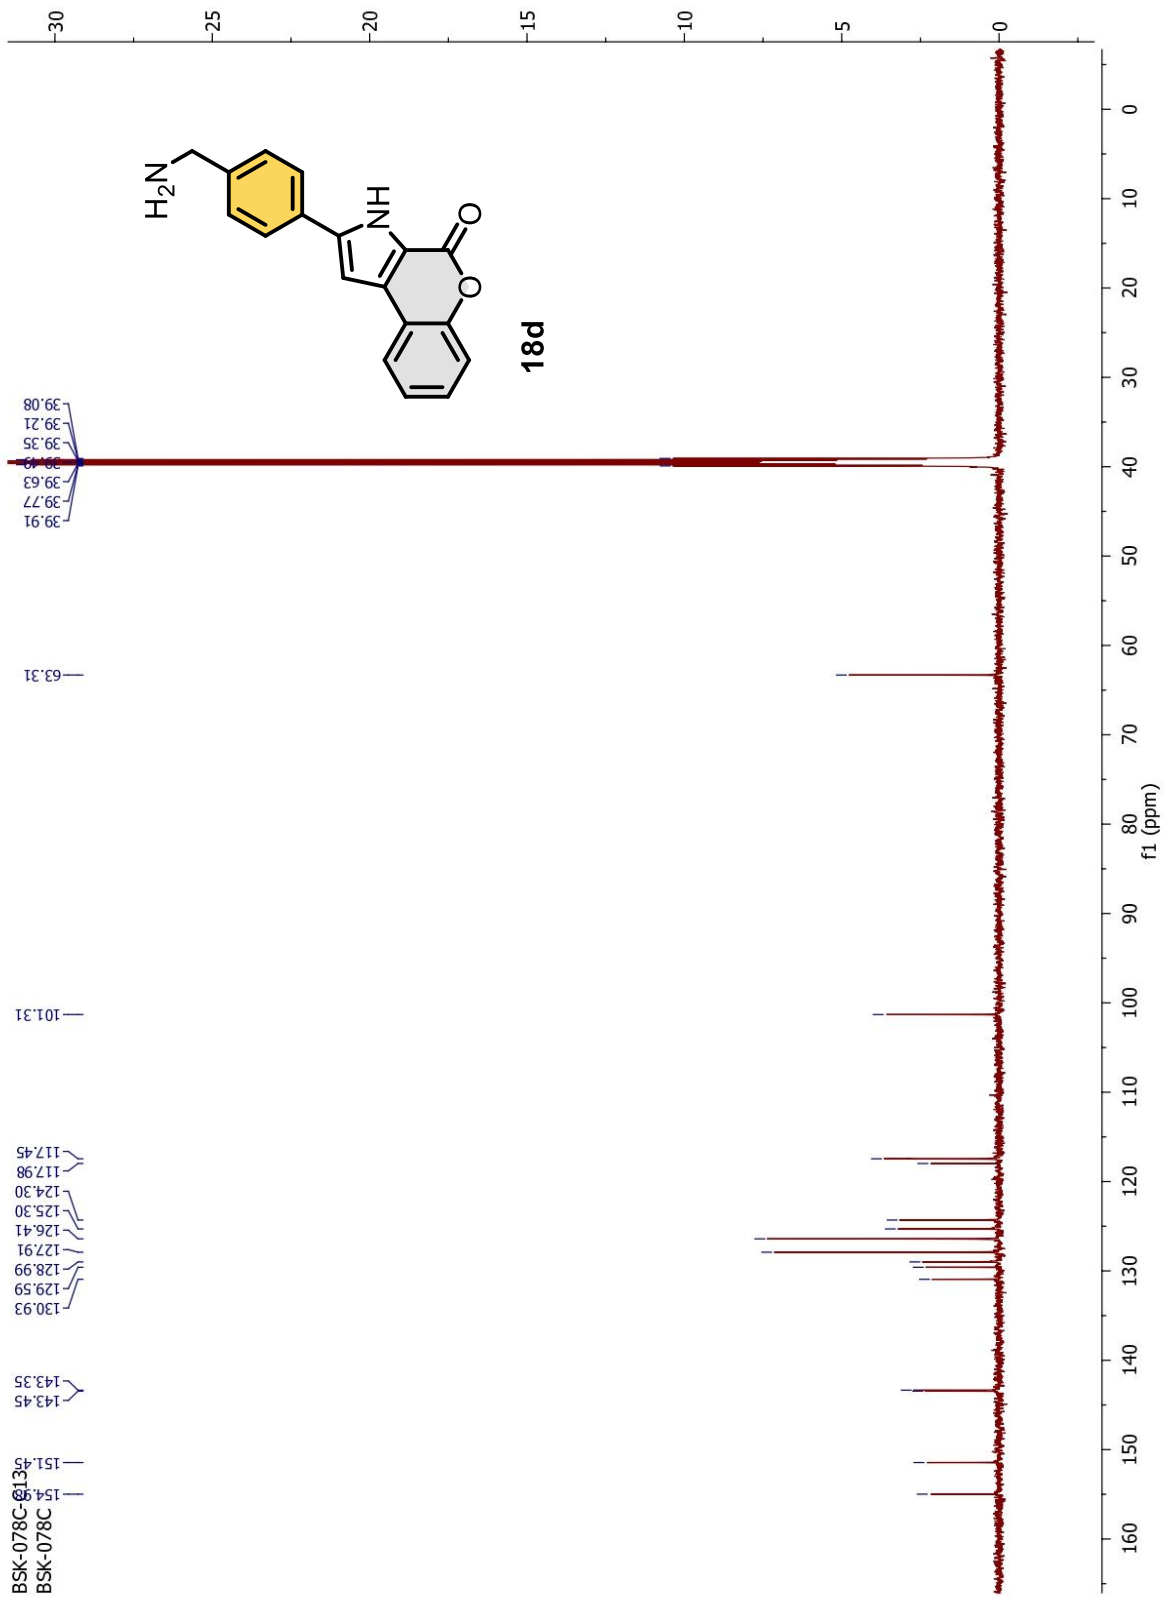

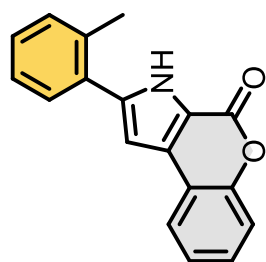

18e

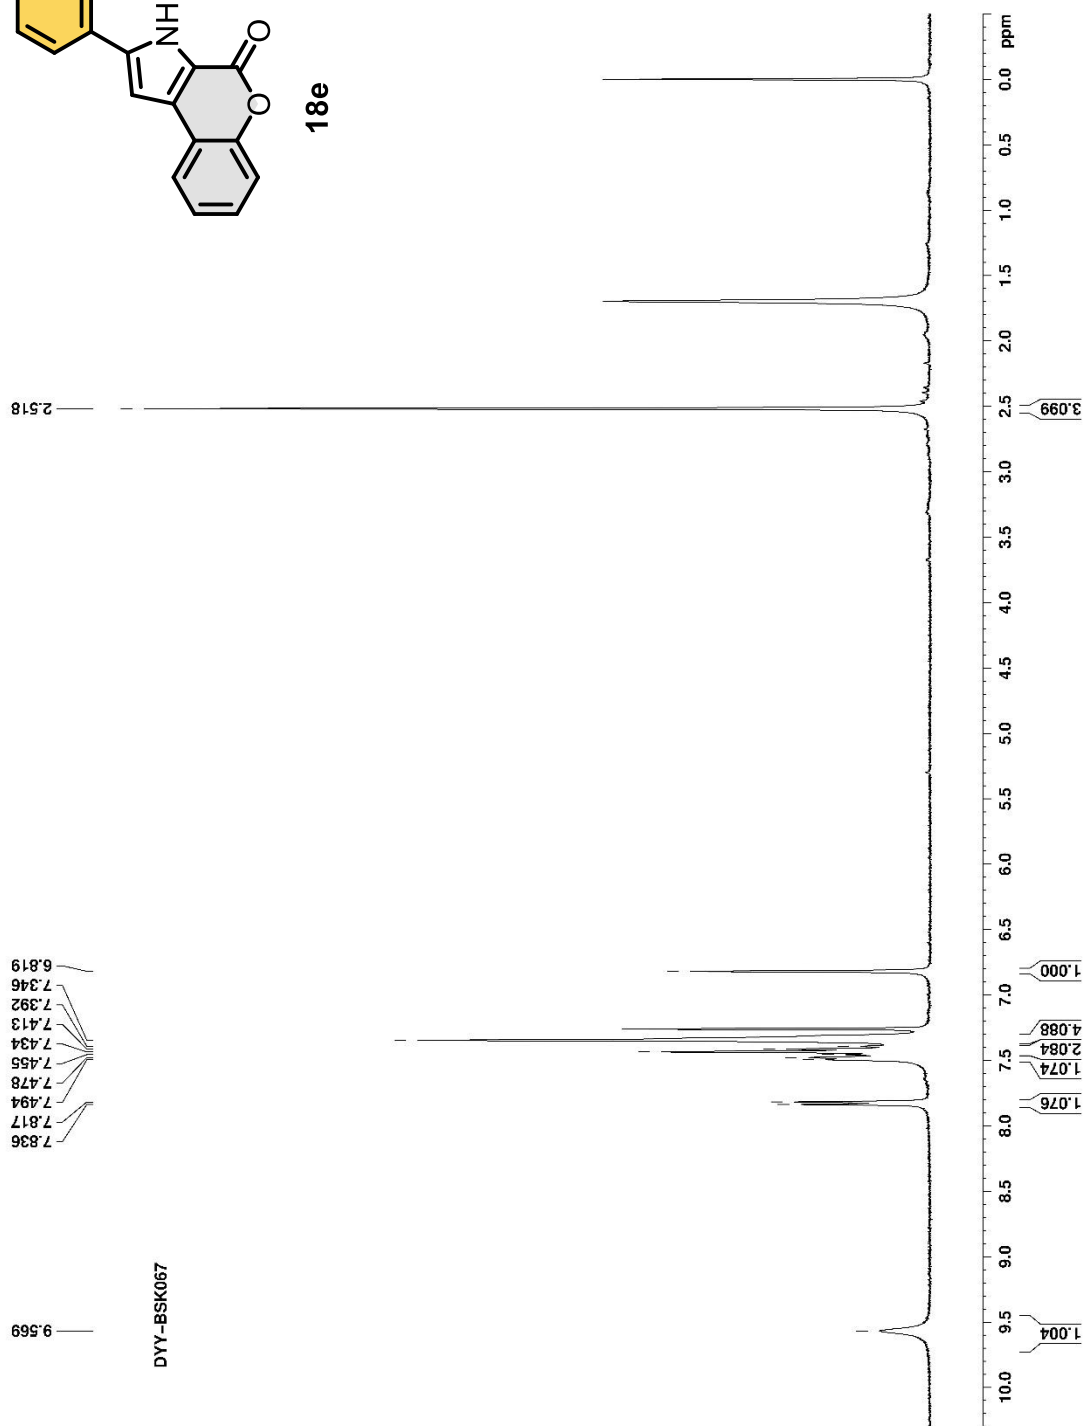

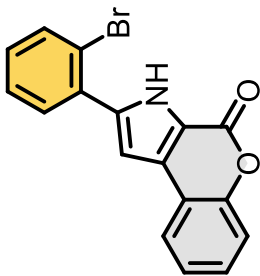

18f

7.843  
7.824  
7.743  
7.723  
7.629  
7.610  
7.463  
7.455  
7.444  
7.435  
7.420  
7.399  
7.354  
7.350  
7.335  
7.319  
7.299  
7.279  
7.033  
7.027

9.945

BSK076

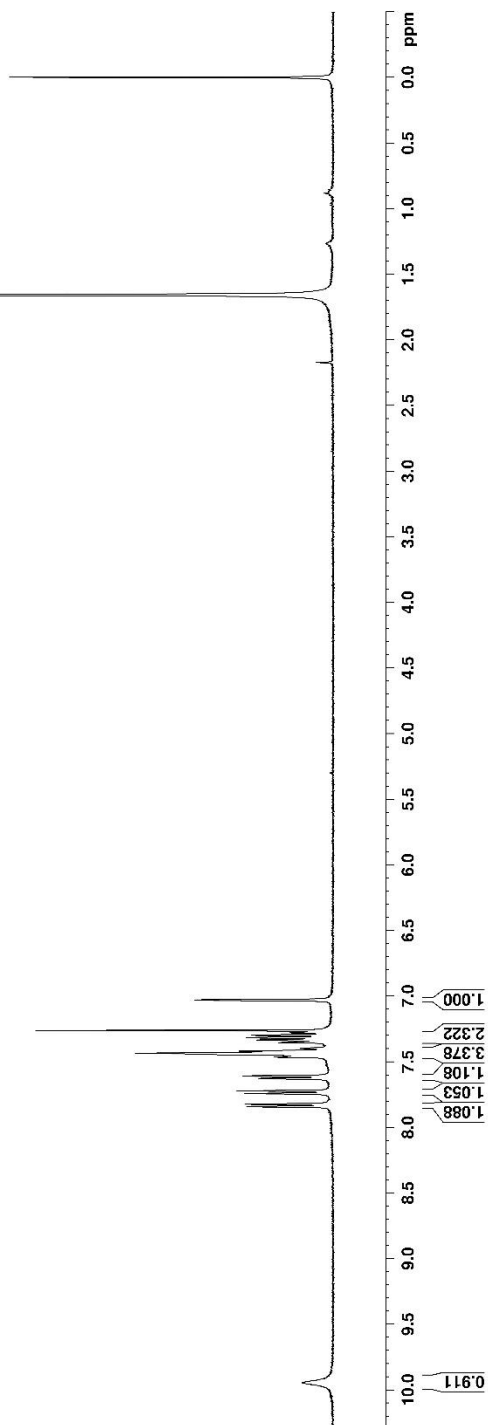

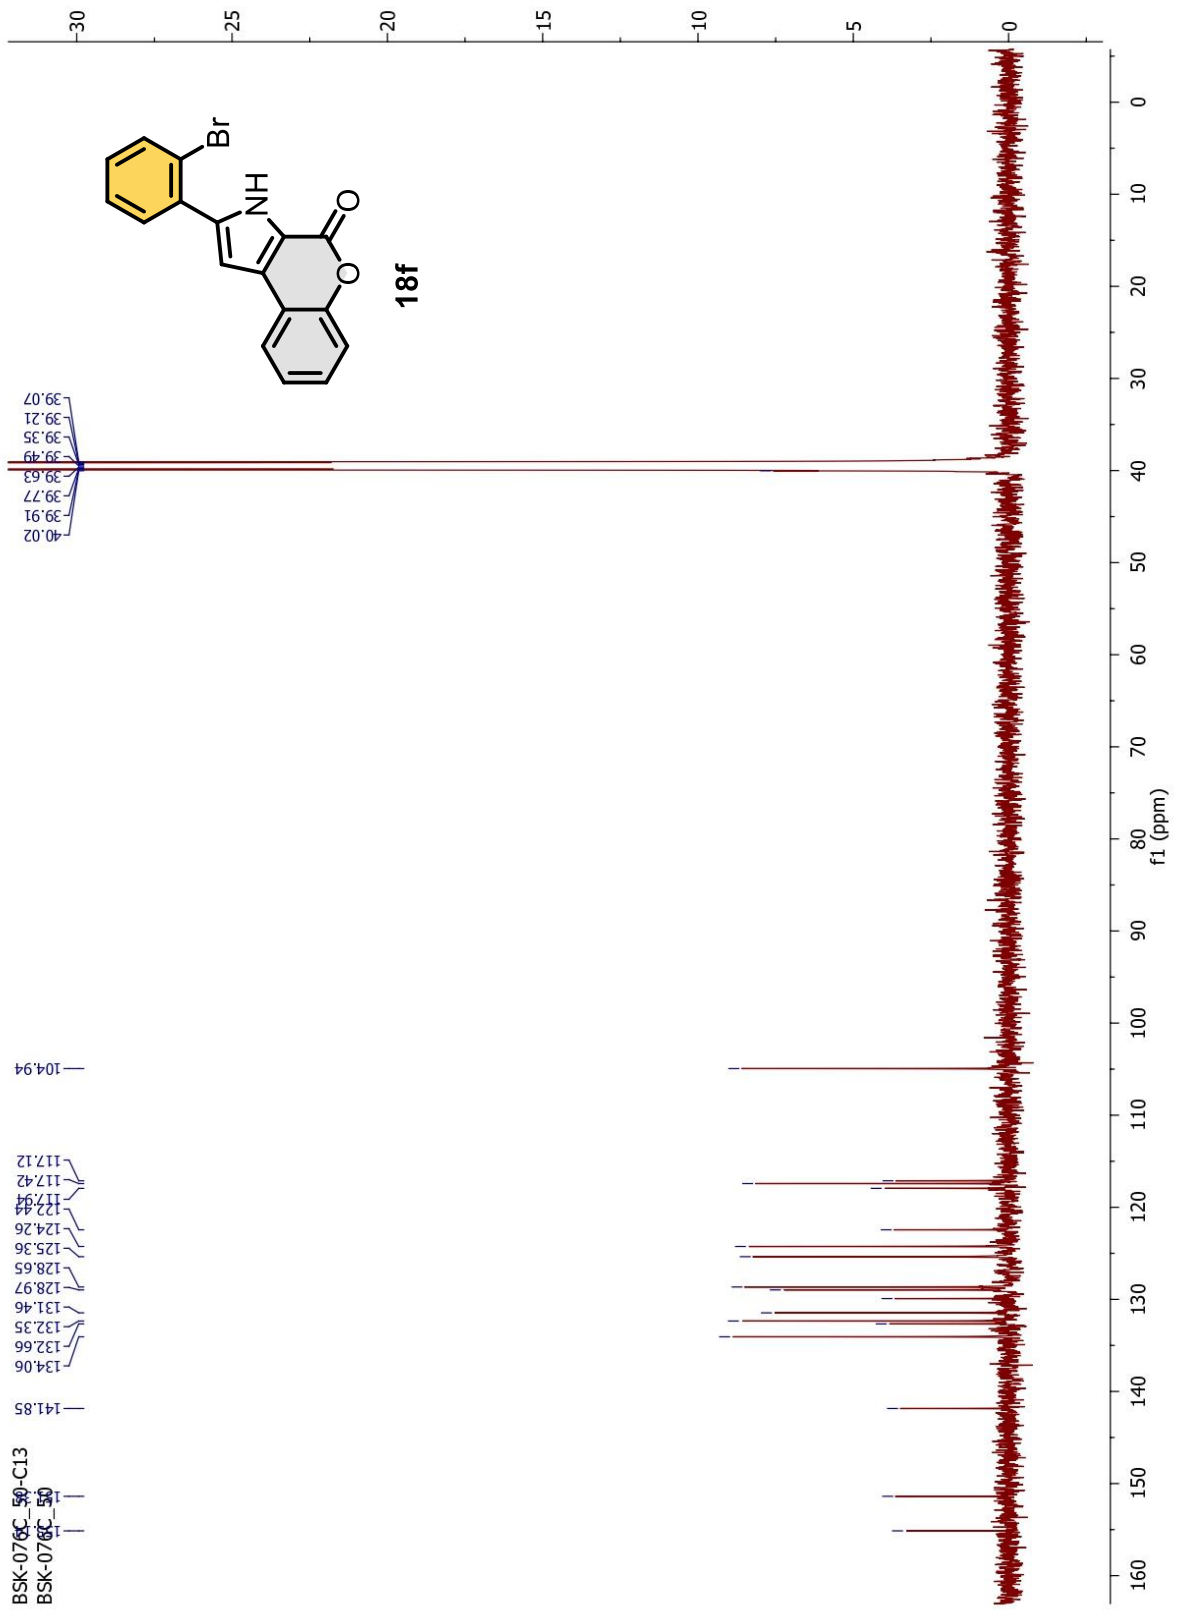



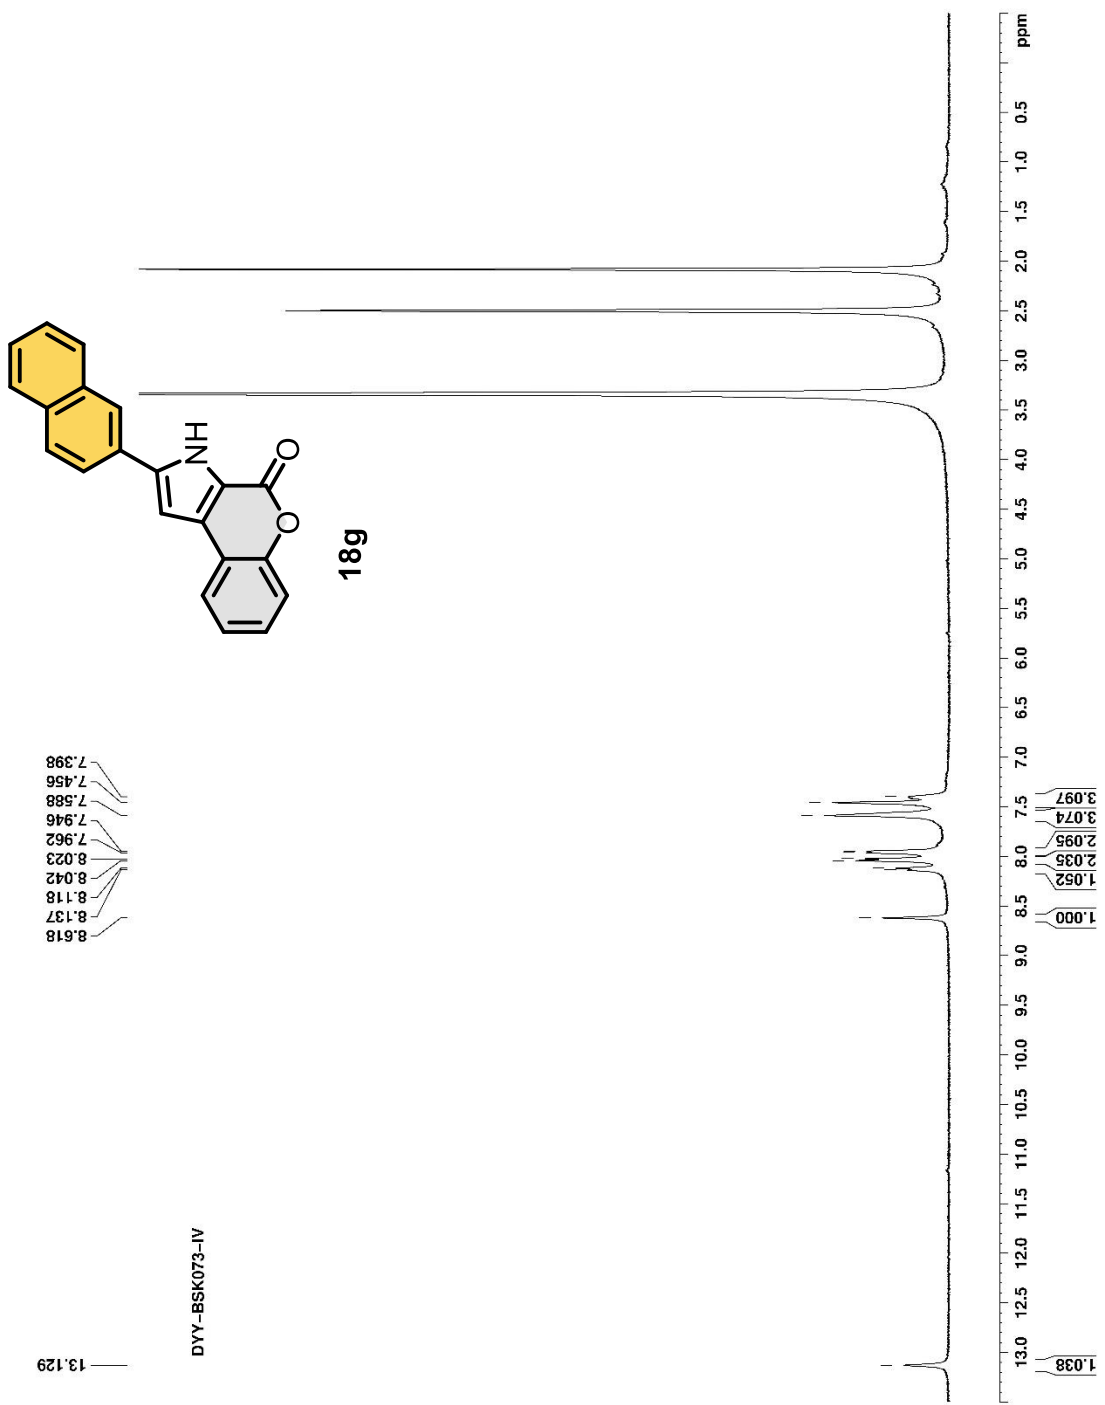

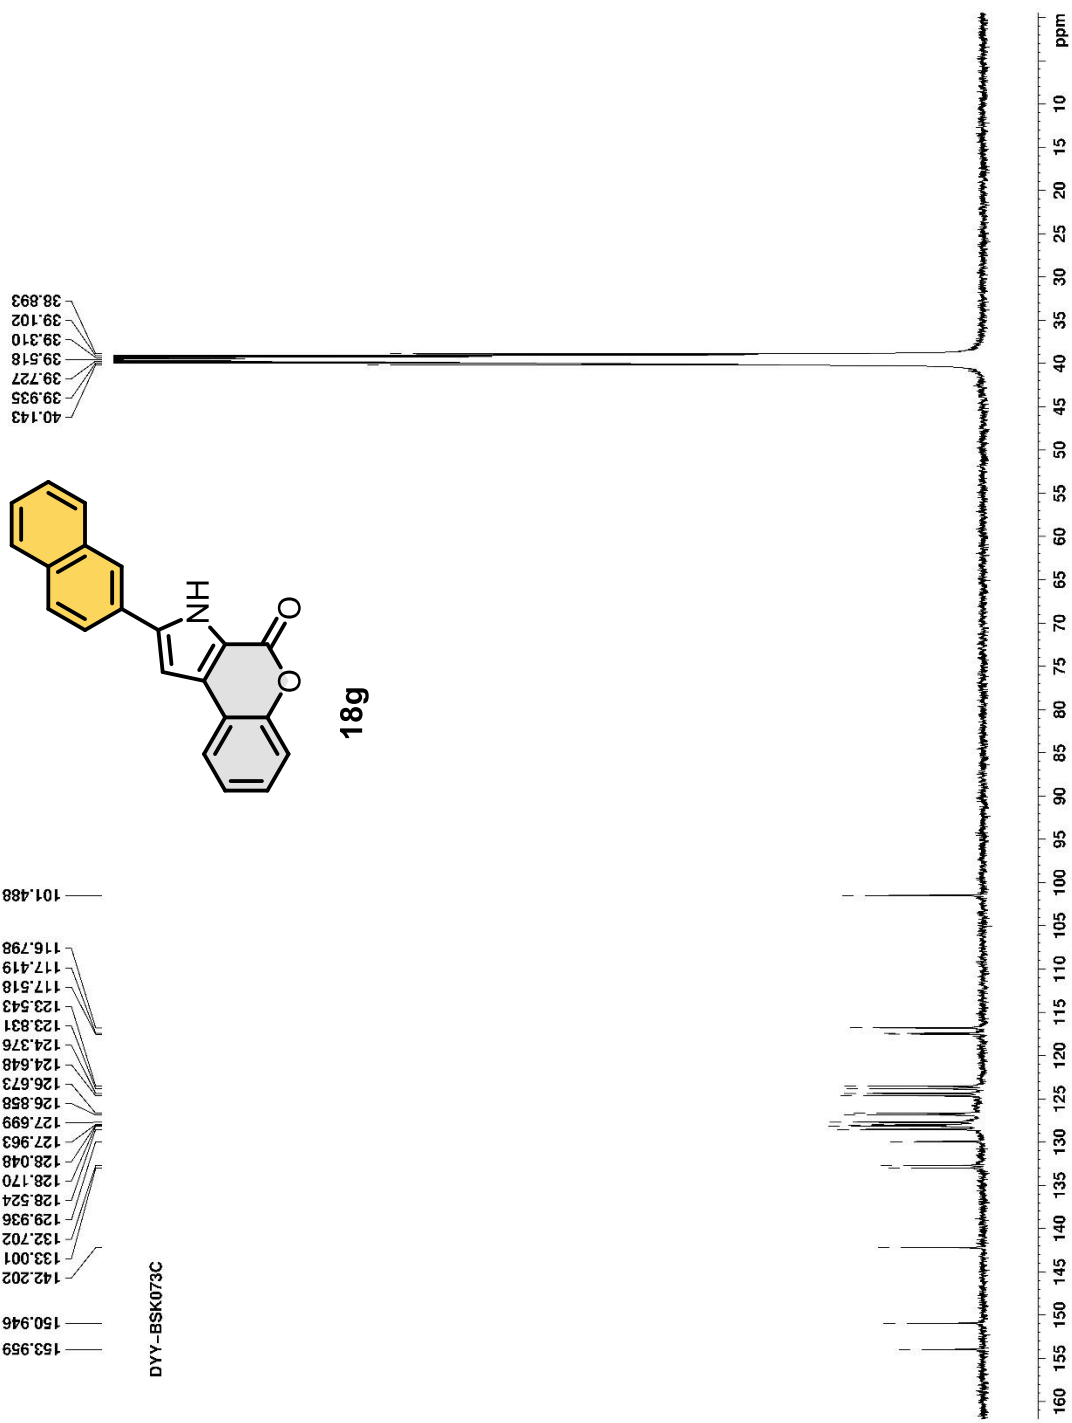

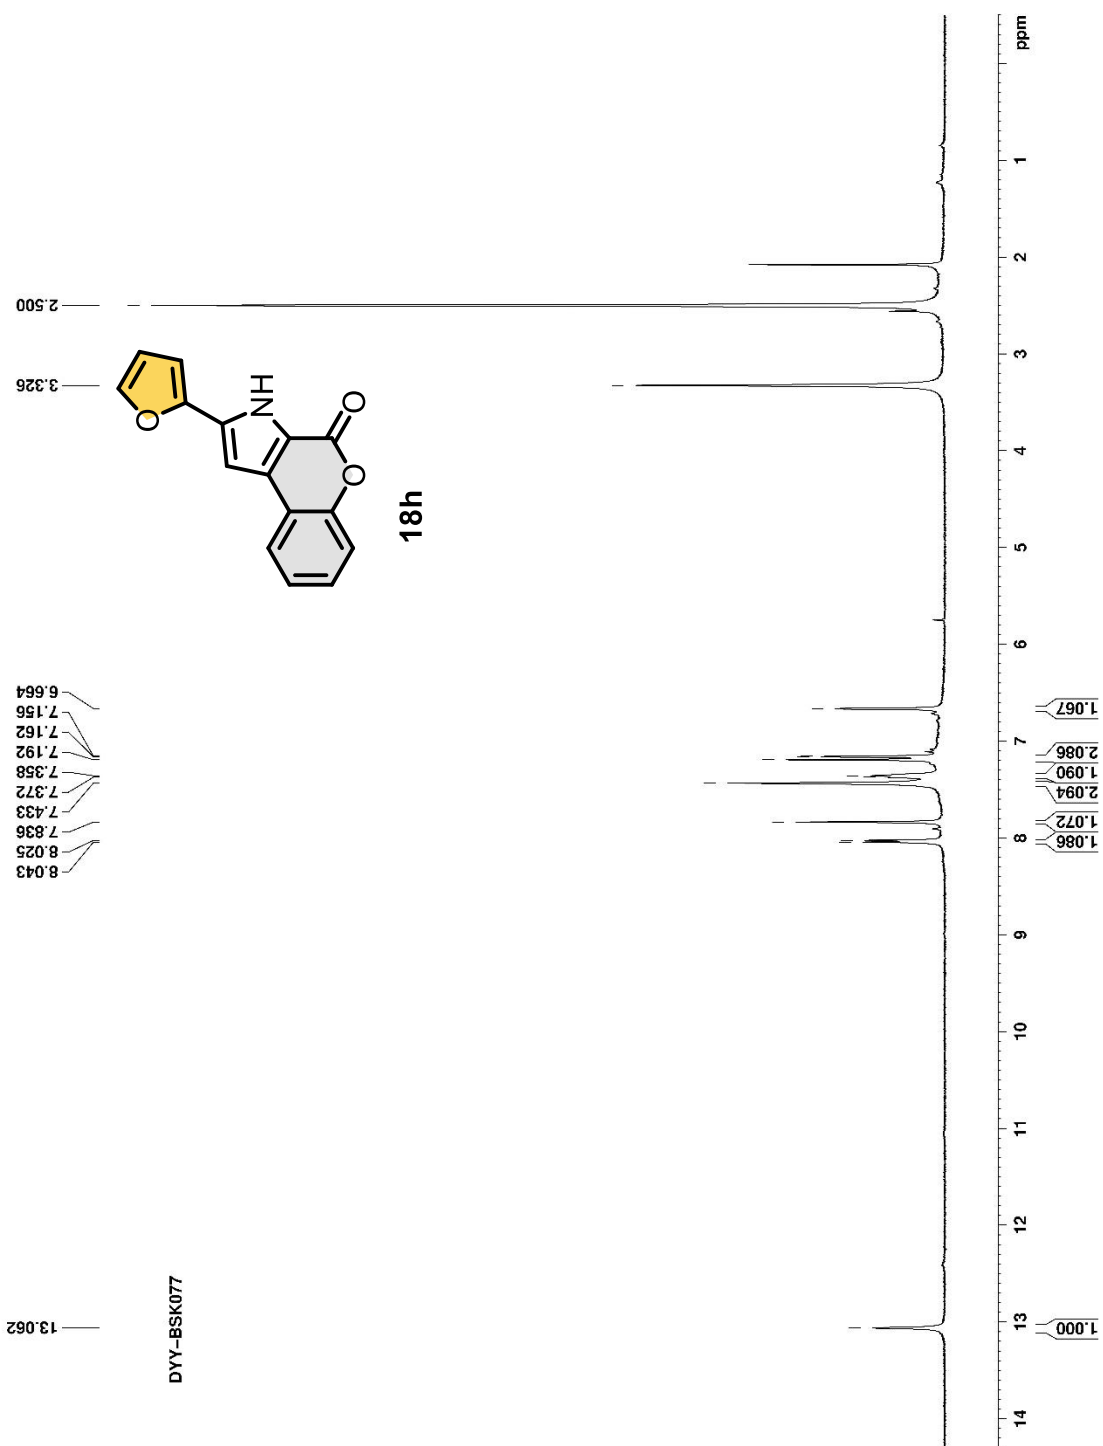

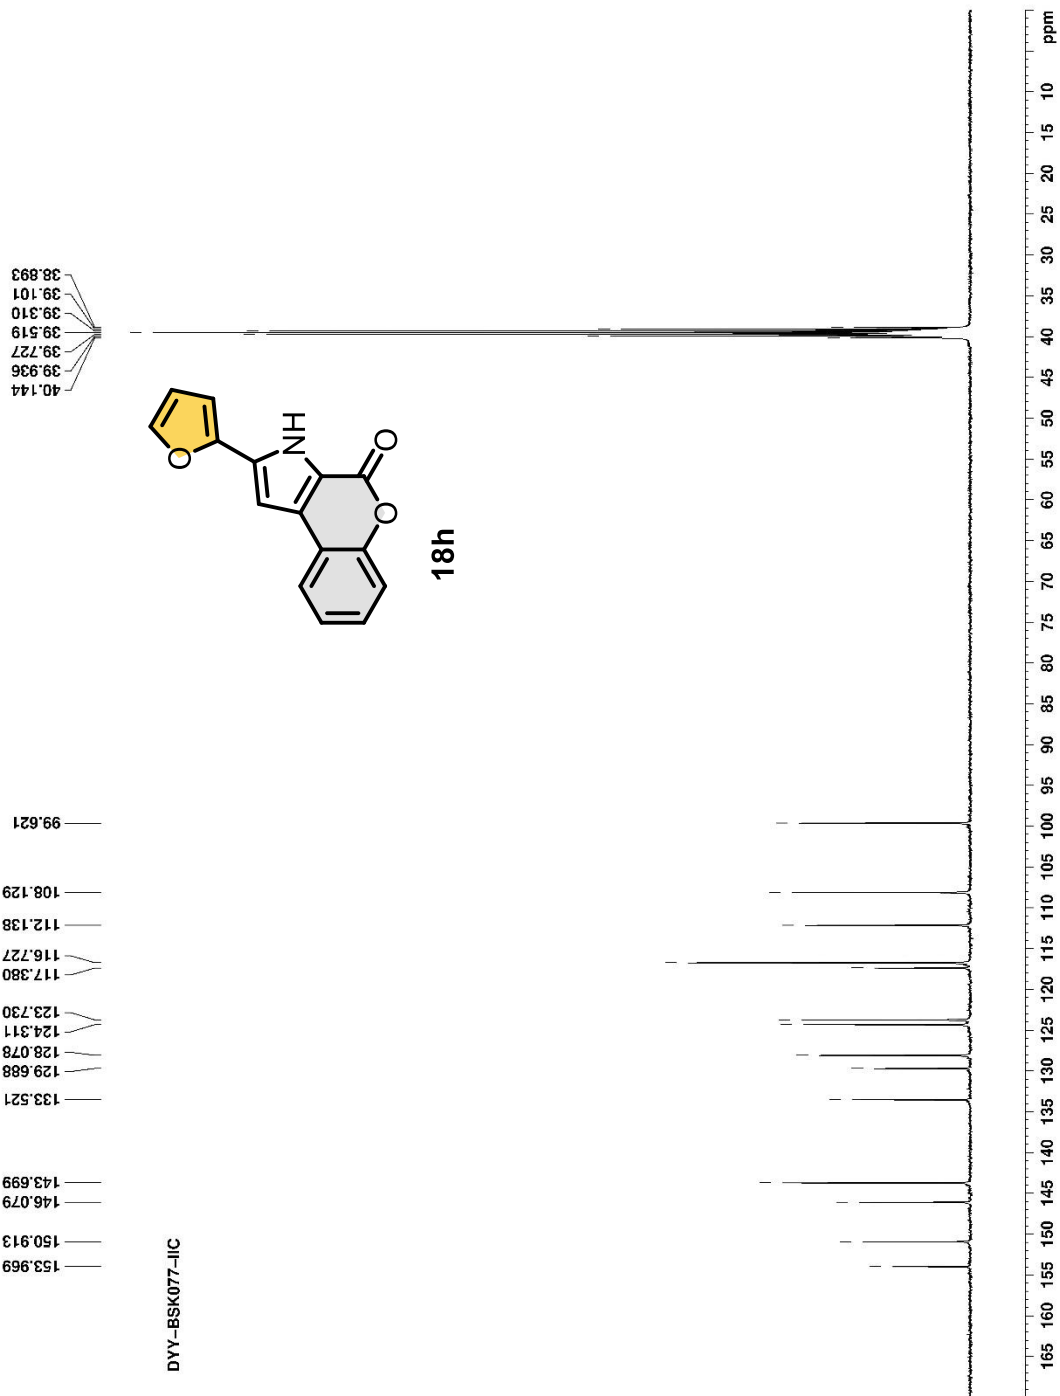

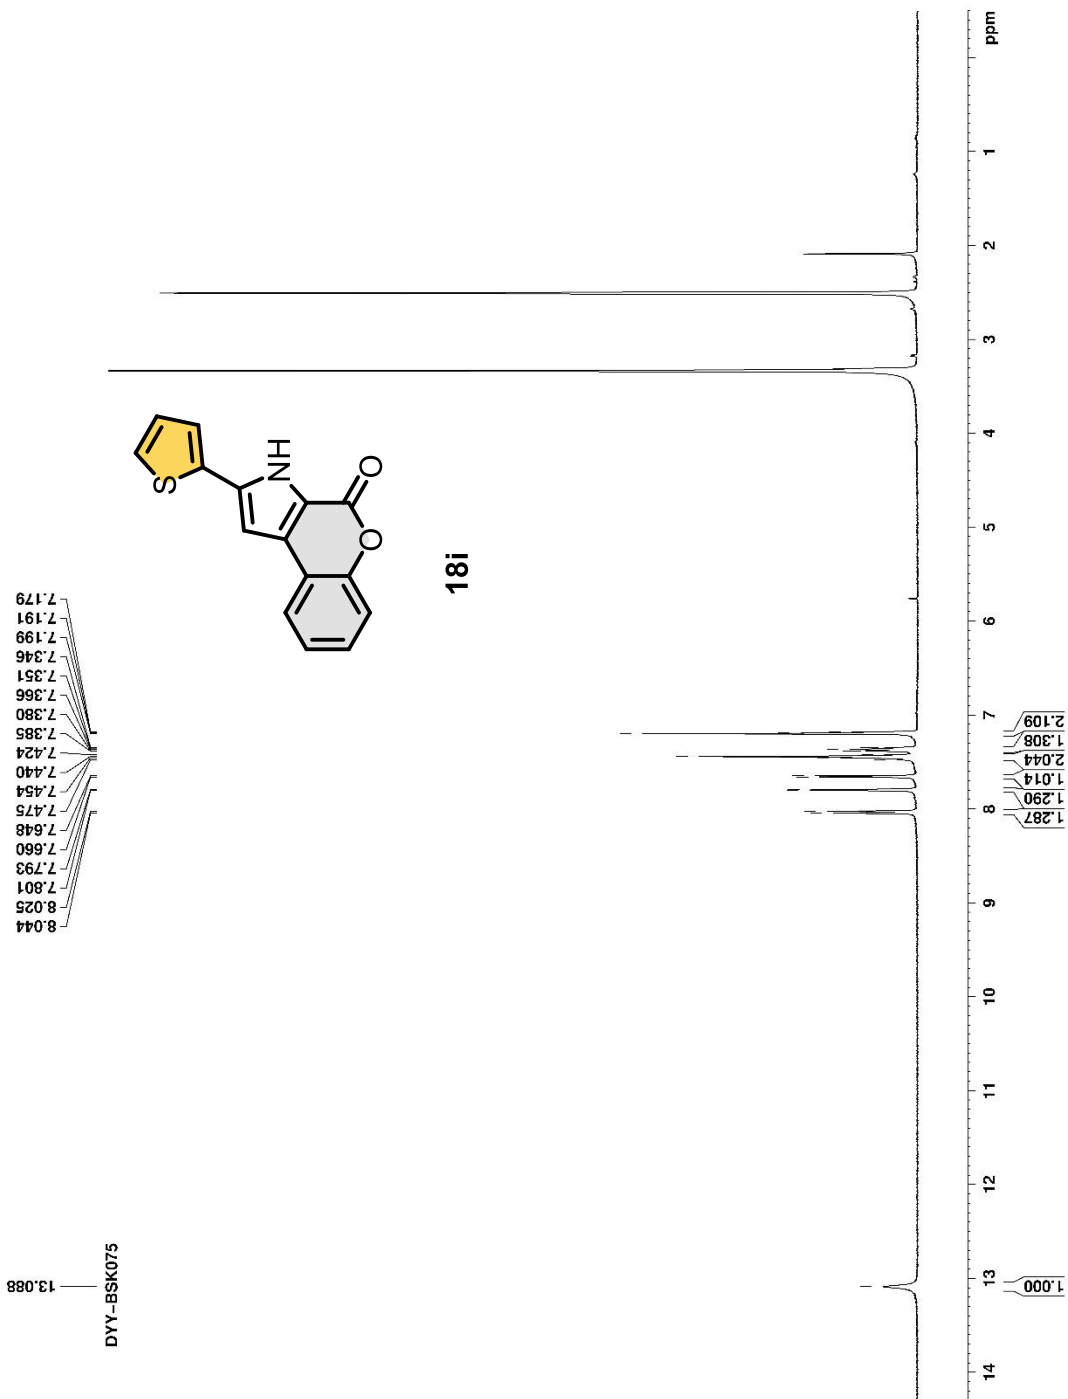

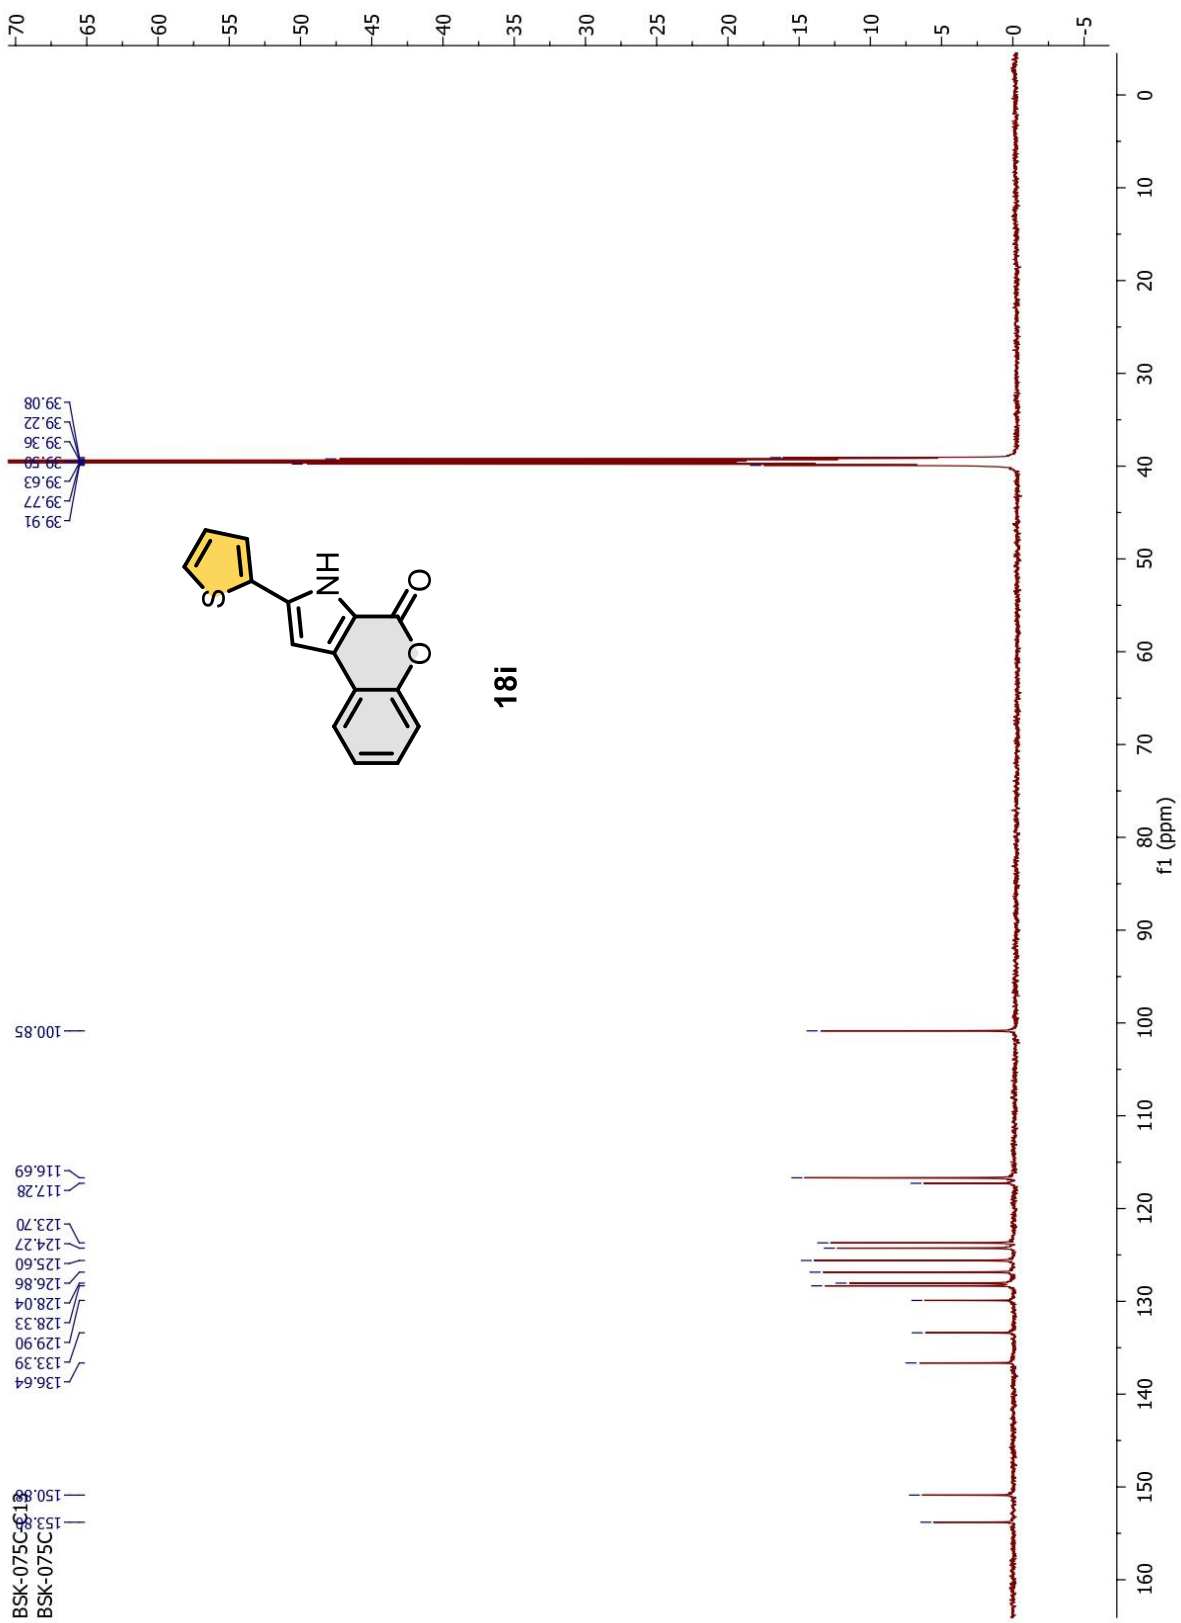

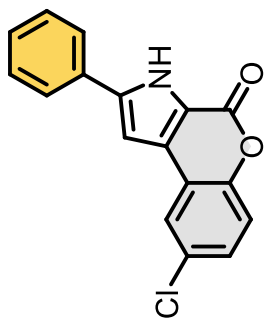

18j

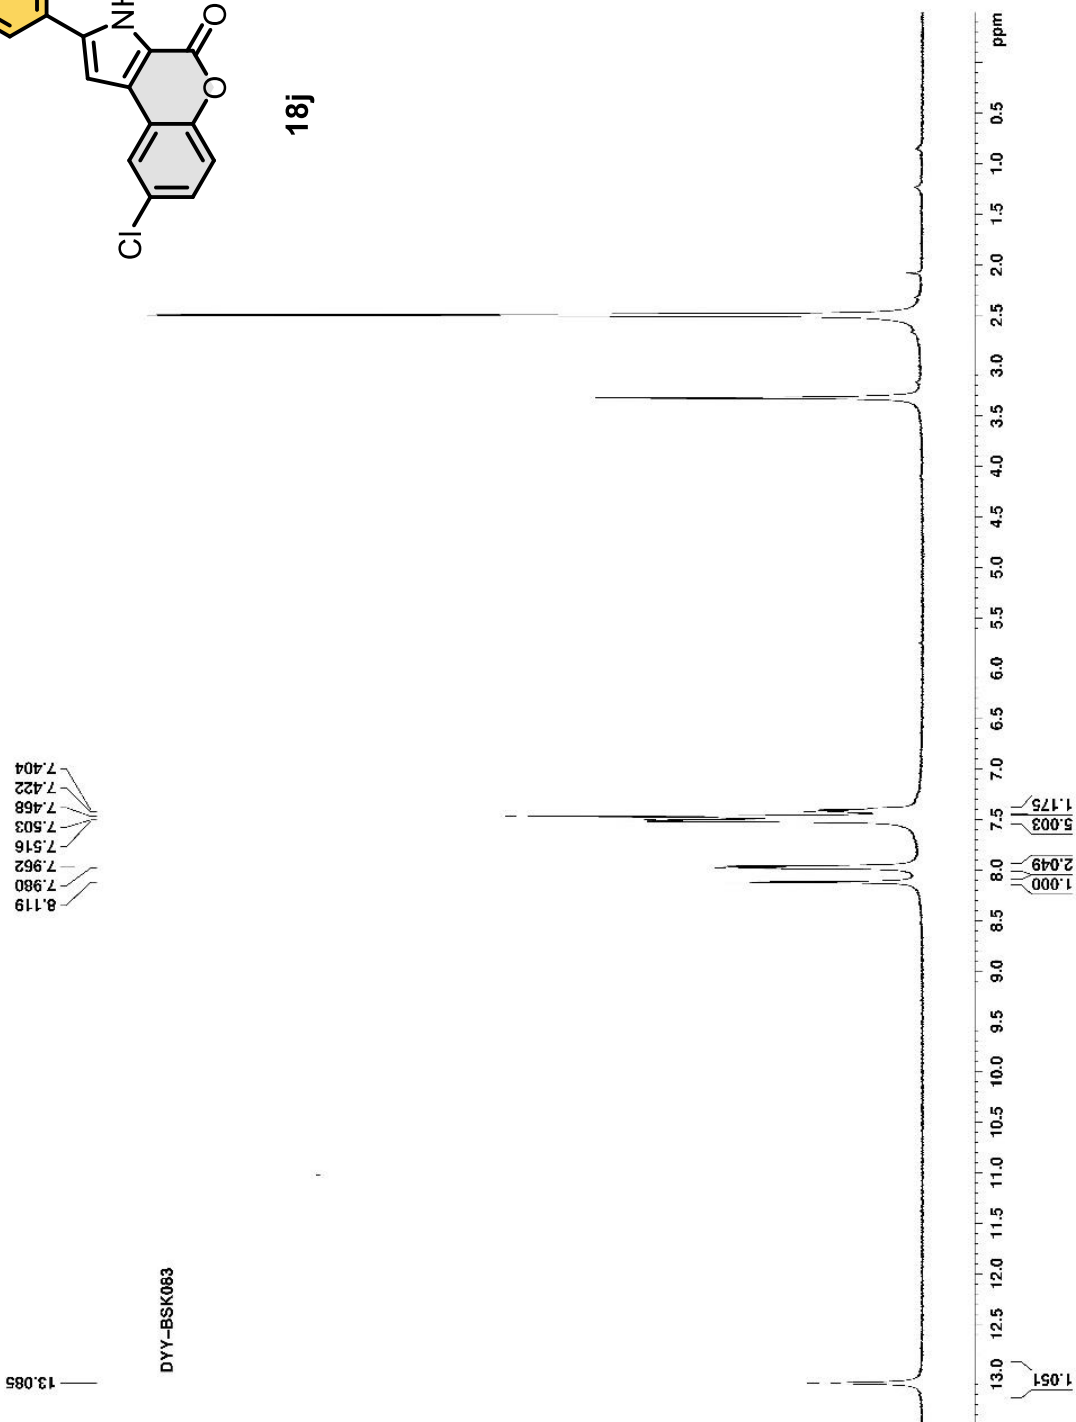

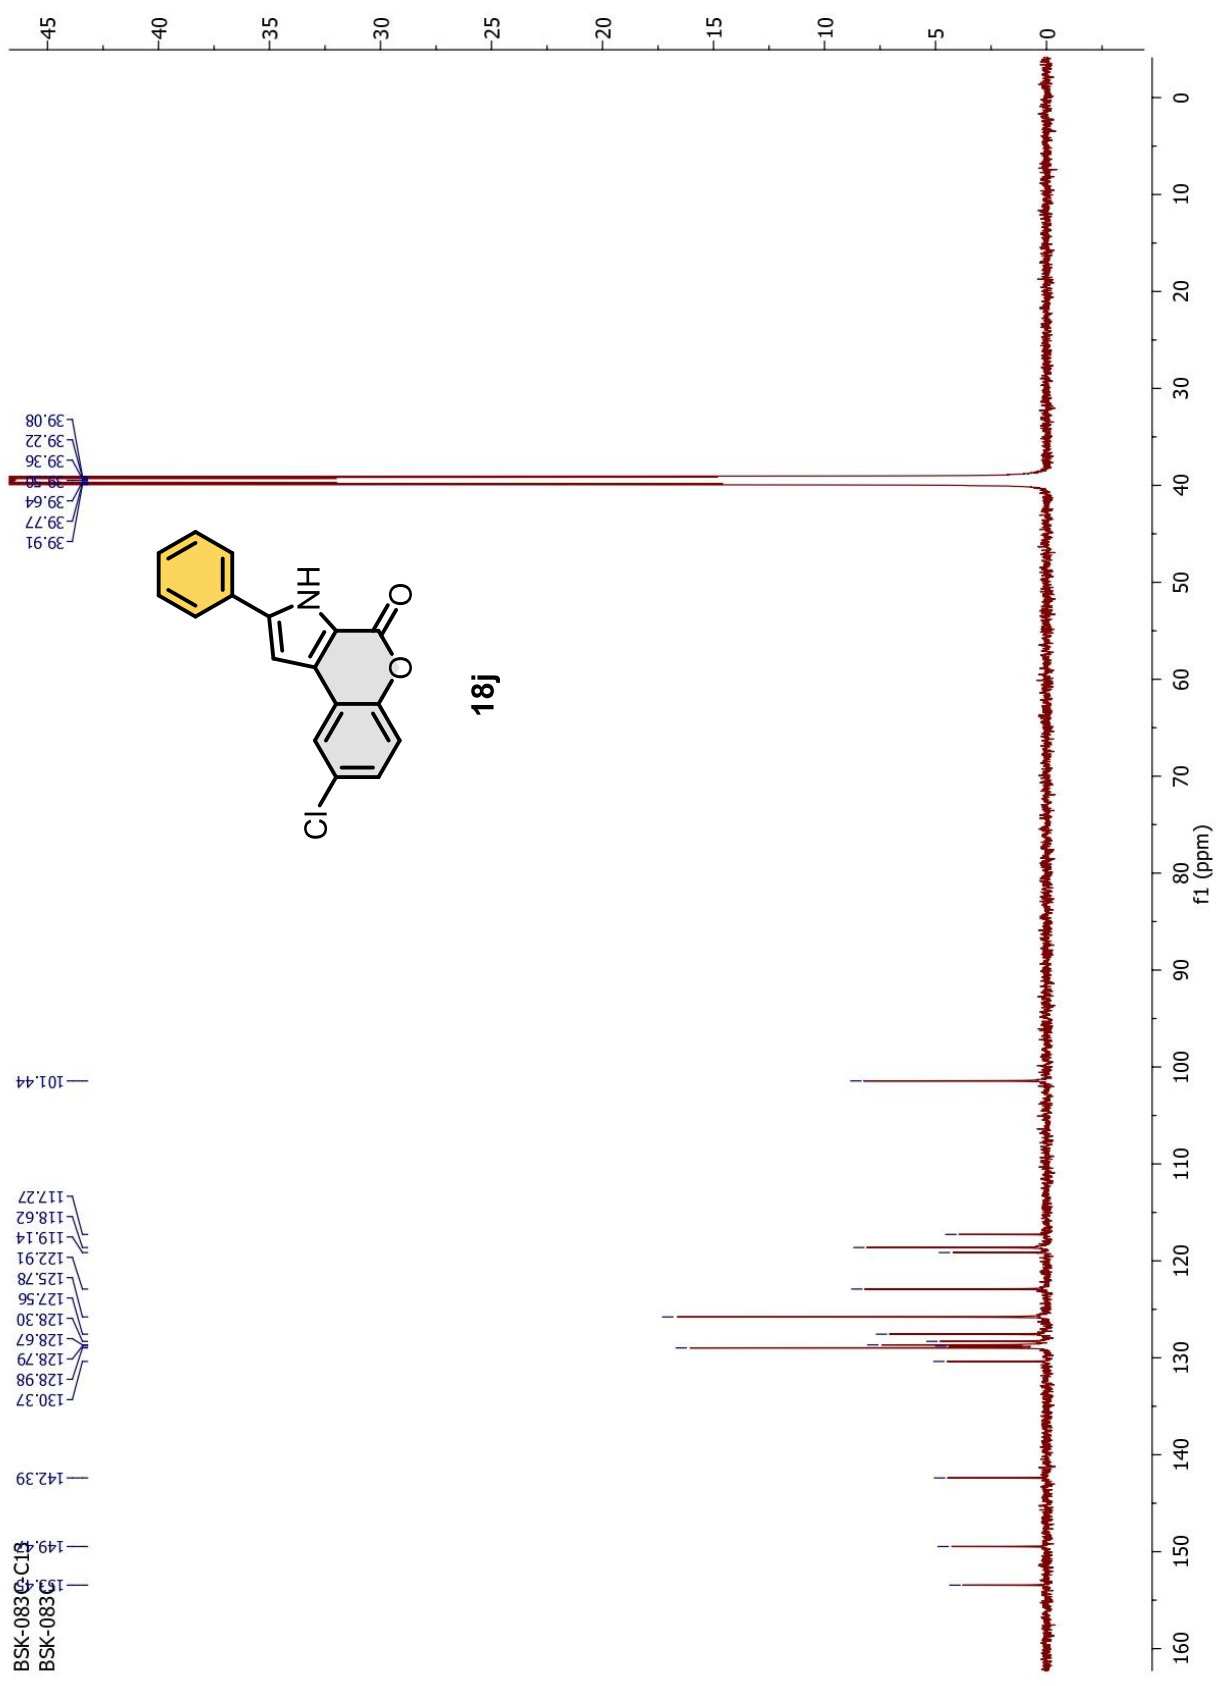



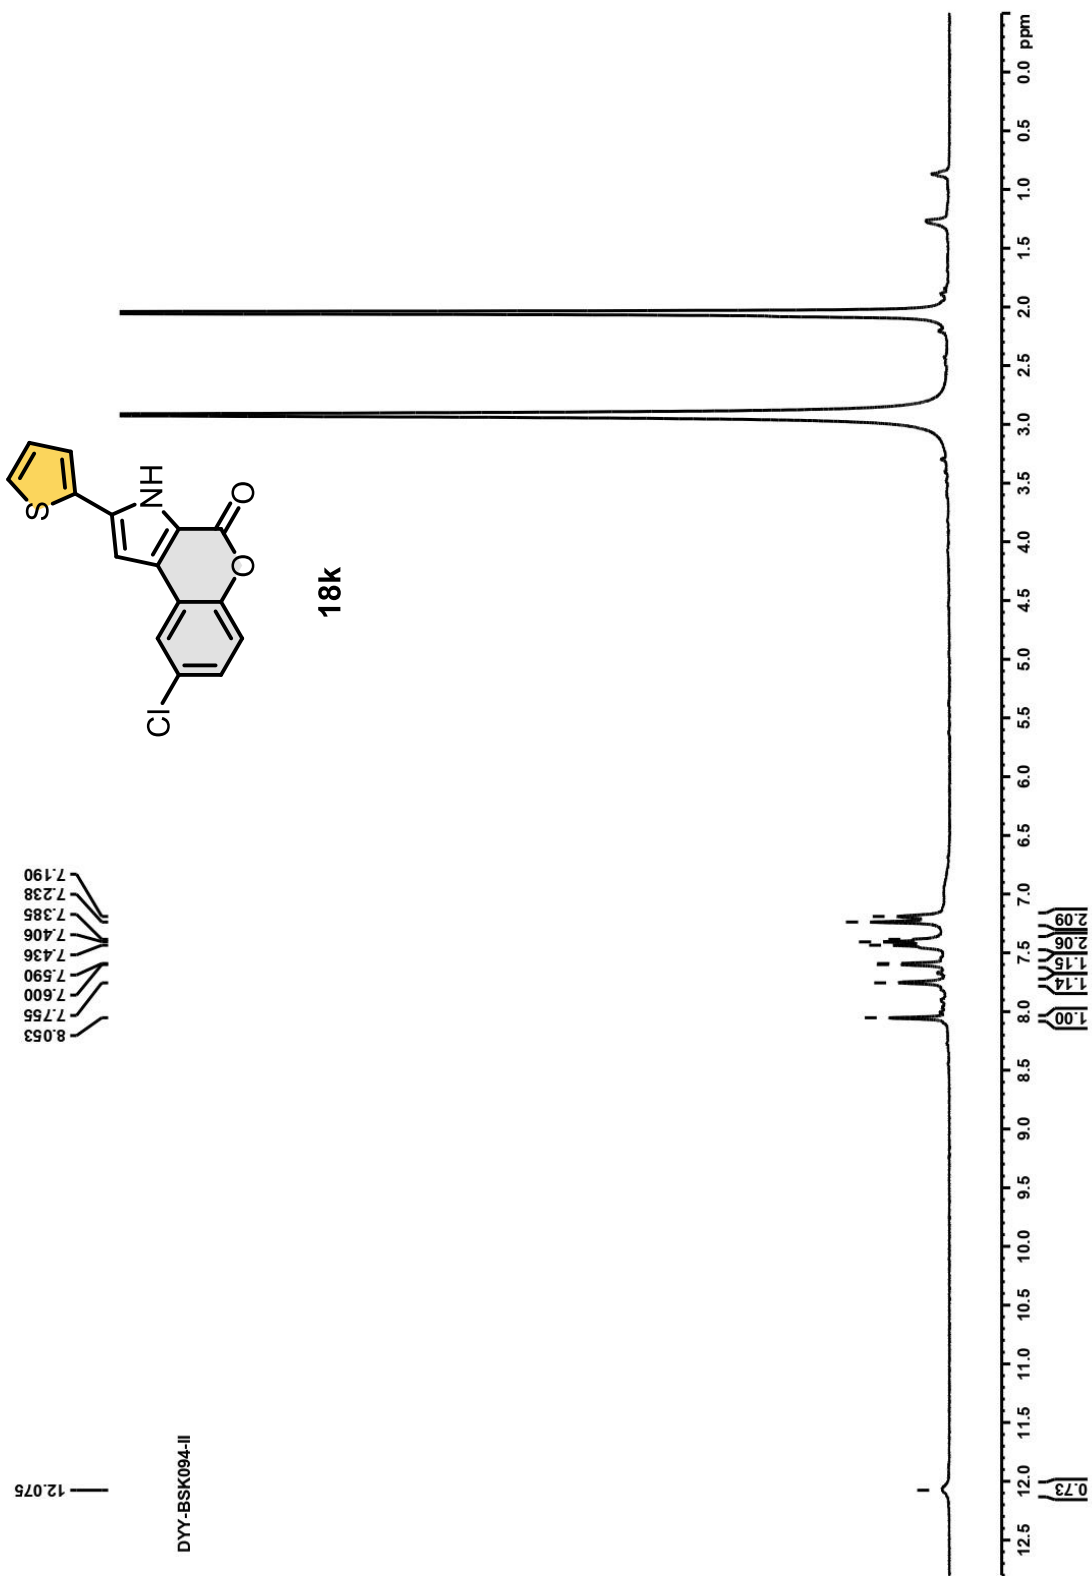

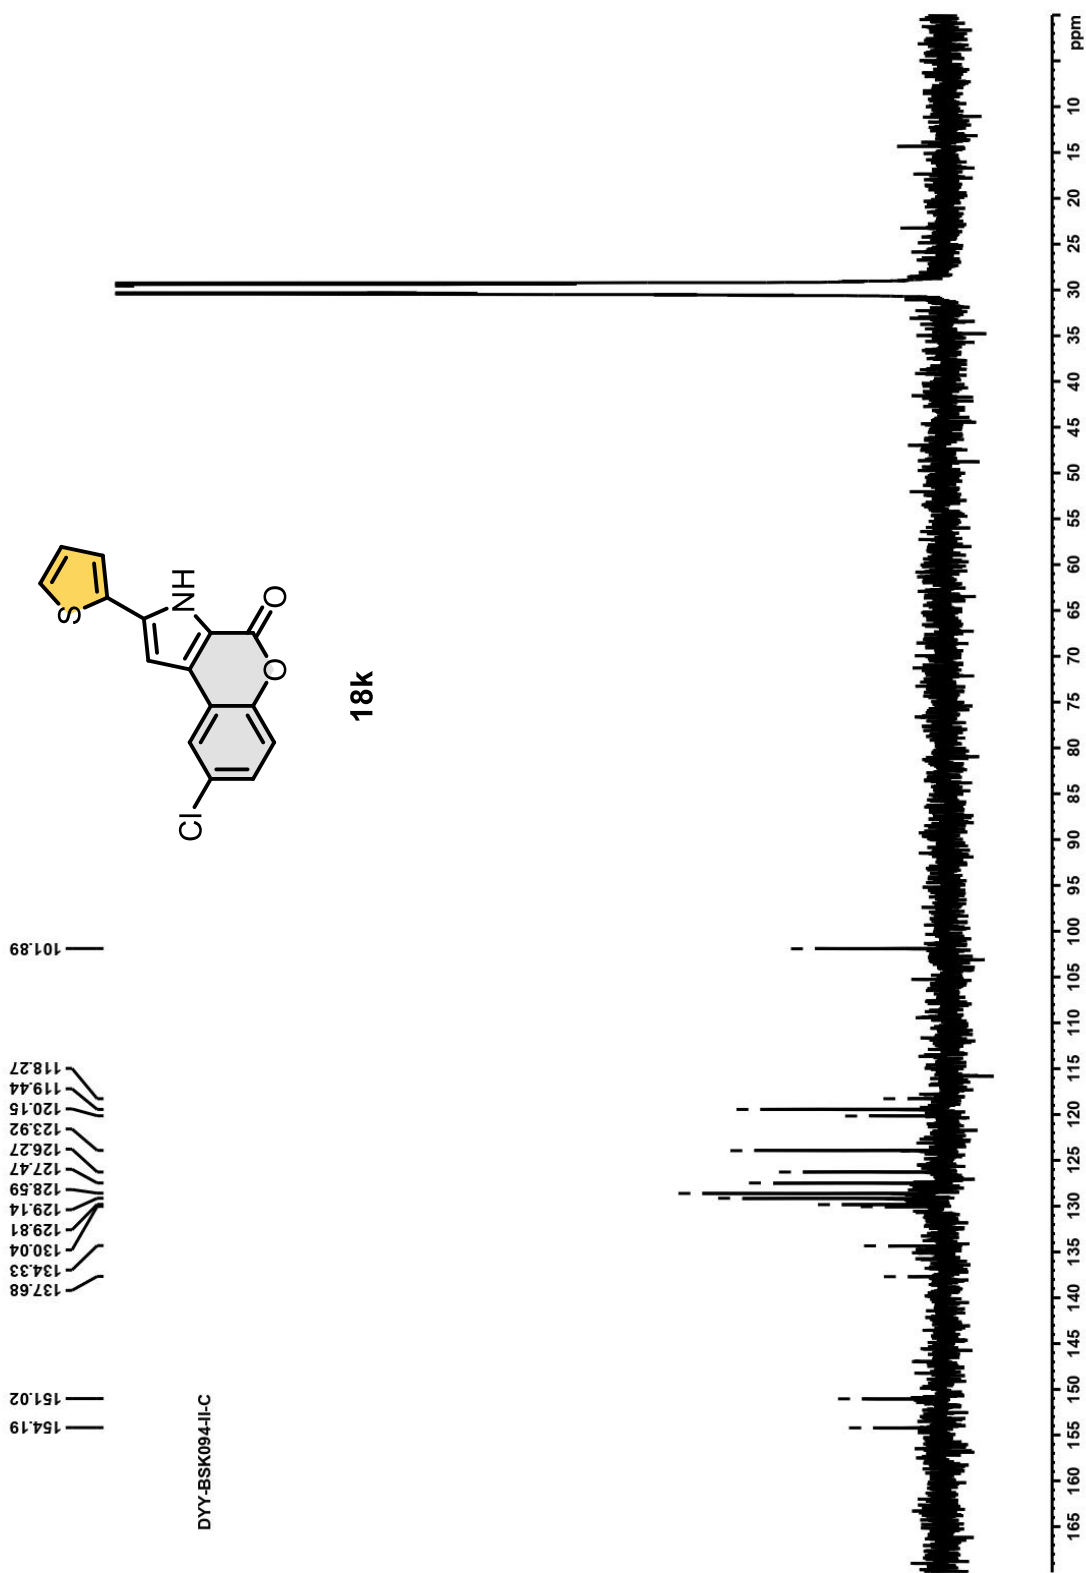

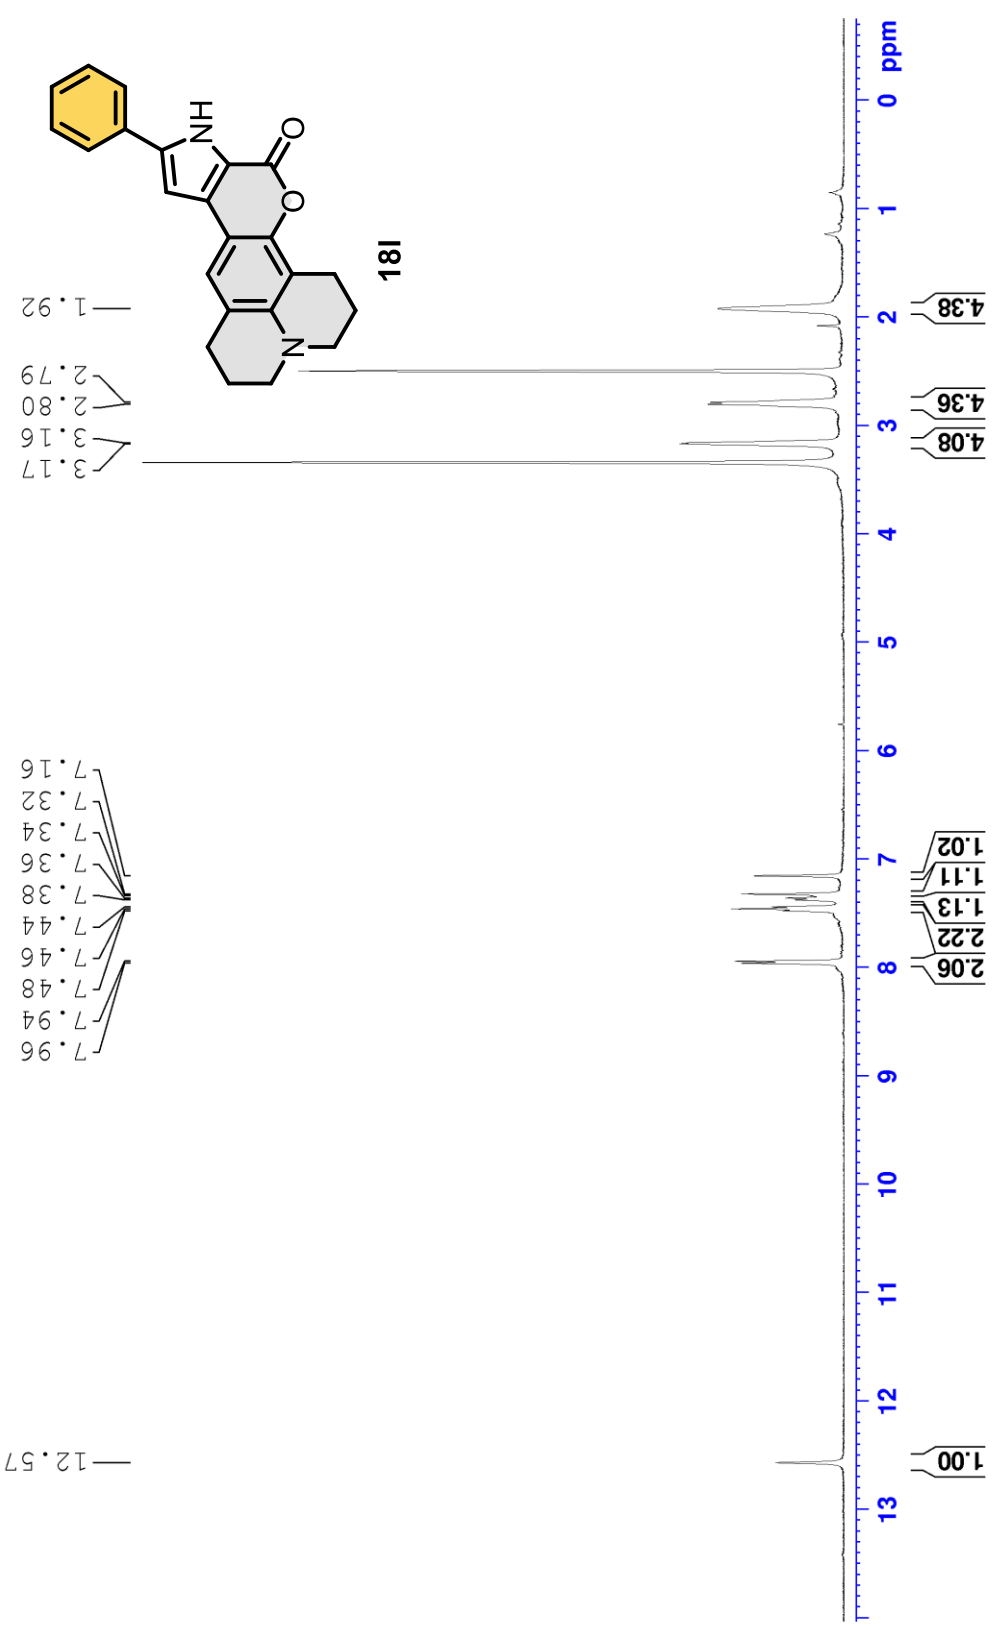

DYY-BSK090

DYY-BSK090

7.16  
7.32  
7.34  
7.36  
7.38  
7.44  
7.46  
7.48

7.94  
7.96

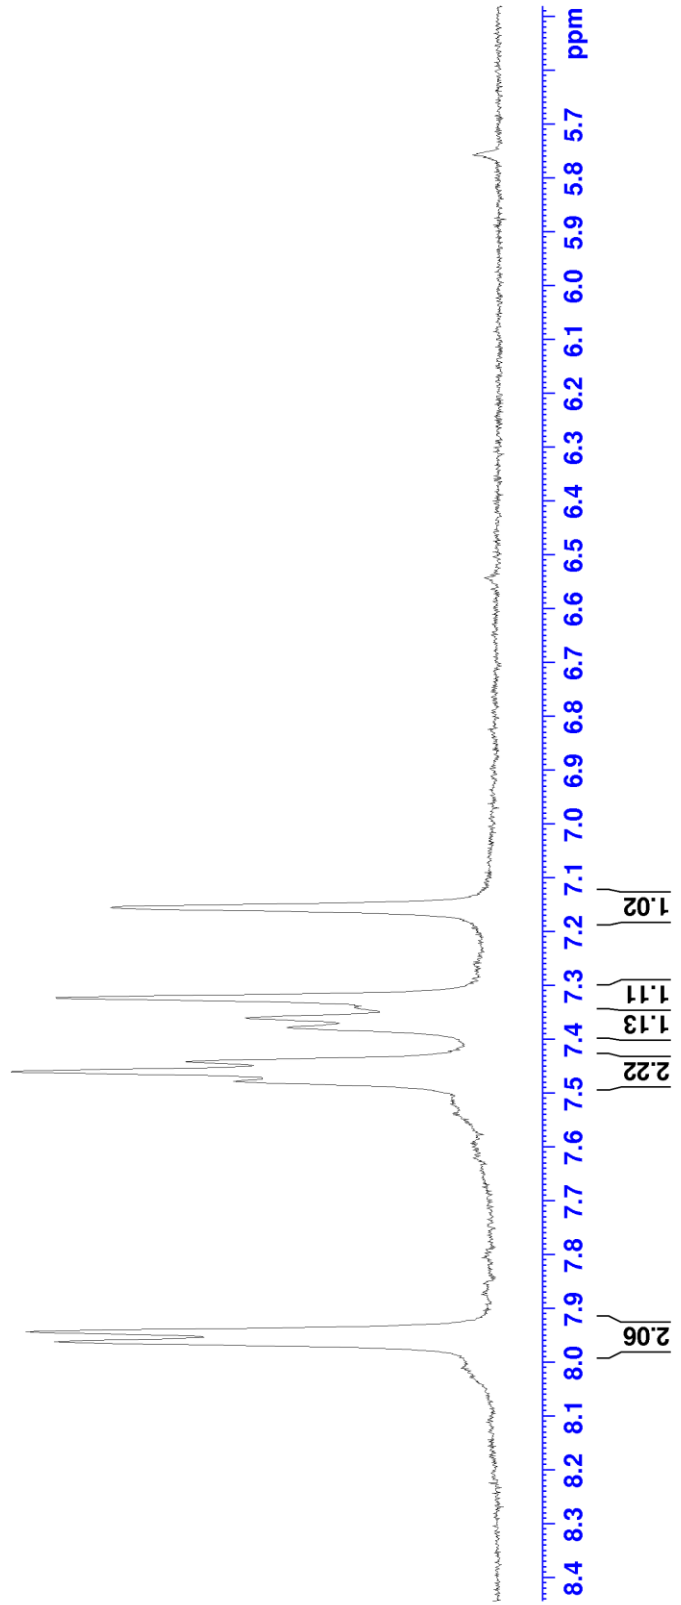

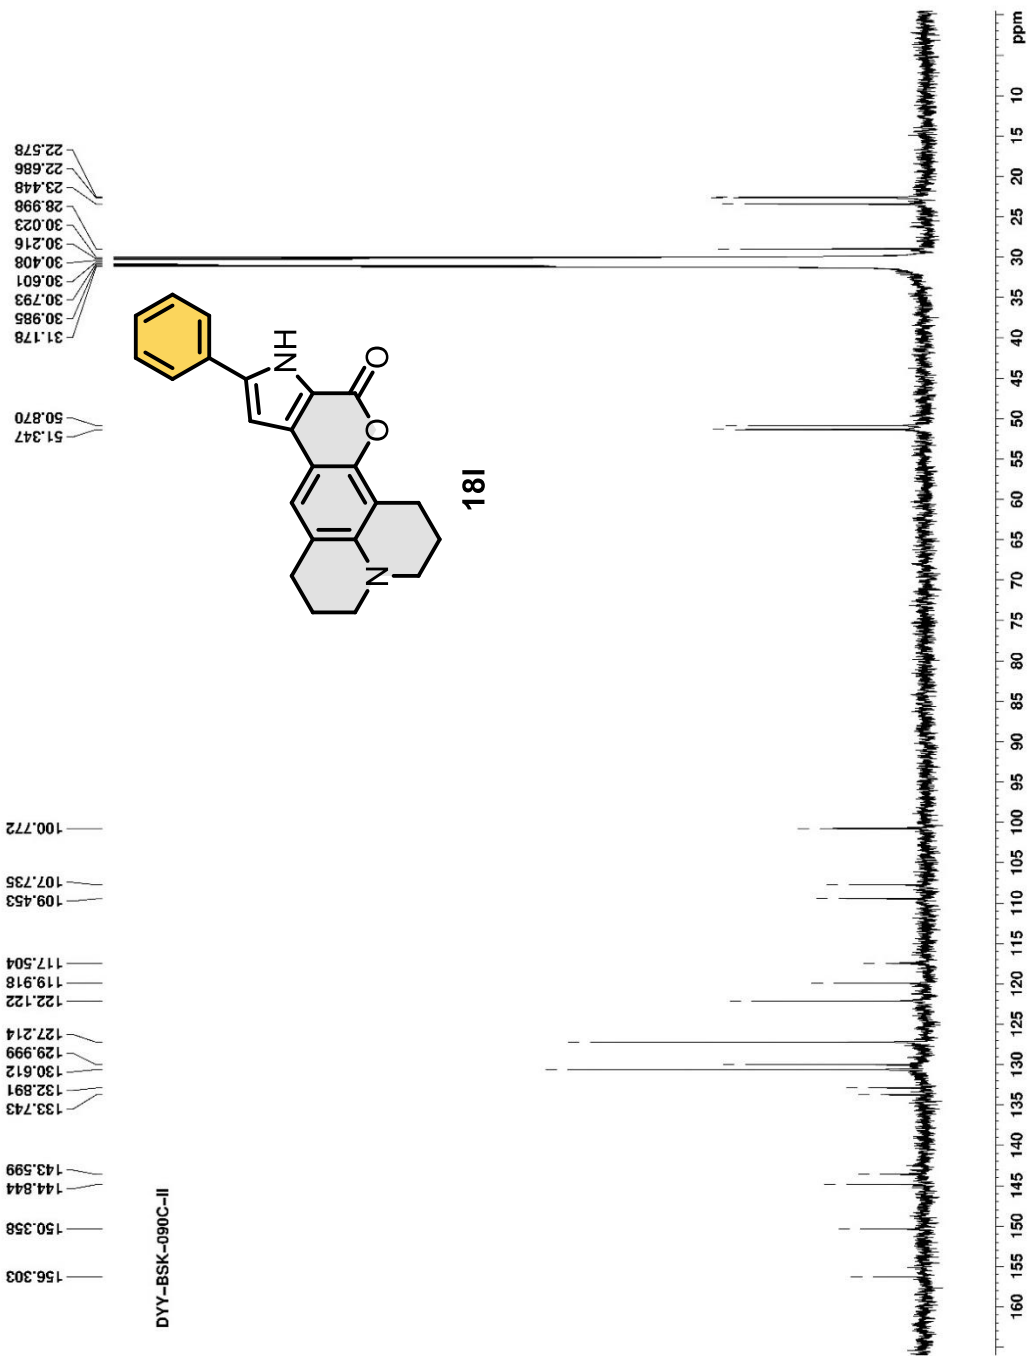

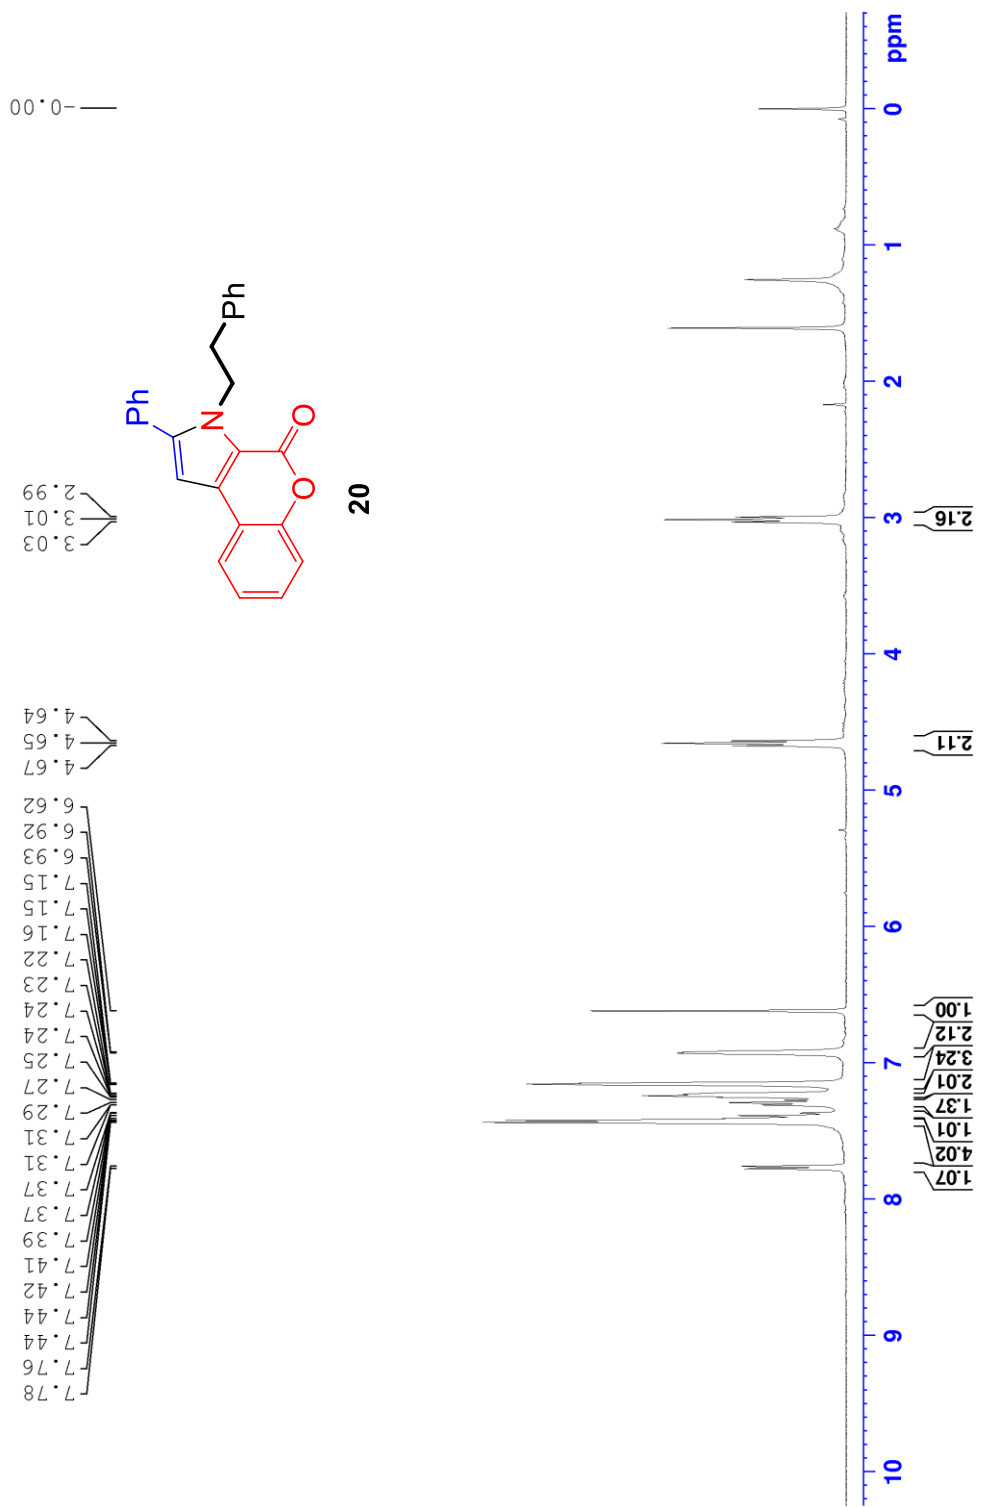

DYY-BSK082-II

DYY-BSK082-II

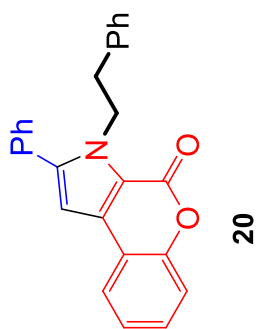

6.62  
6.92  
6.93  
7.15  
7.15  
7.16  
7.22  
7.23  
7.24  
7.24  
7.25  
7.27  
7.29  
7.31  
7.31  
7.37  
7.37  
7.37  
7.39  
7.41  
7.42  
7.44  
7.44  
7.76  
7.78

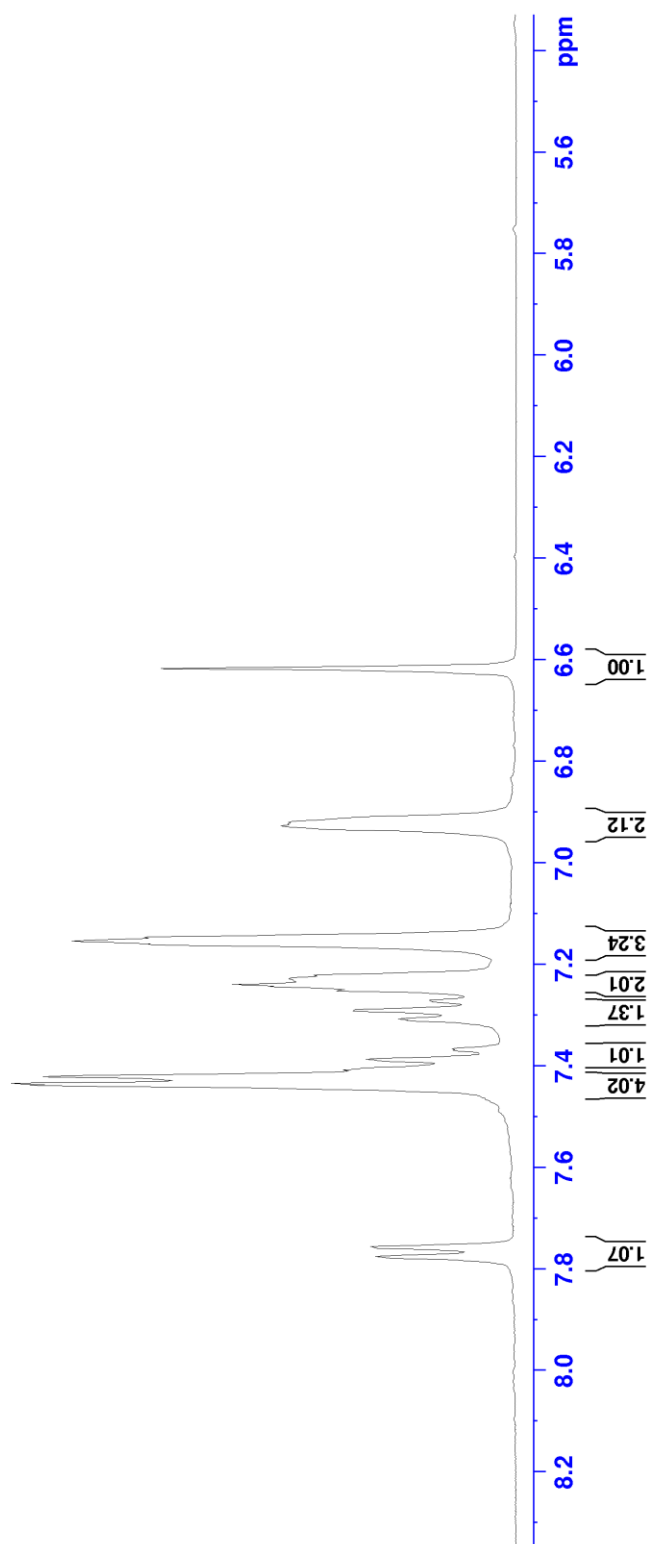

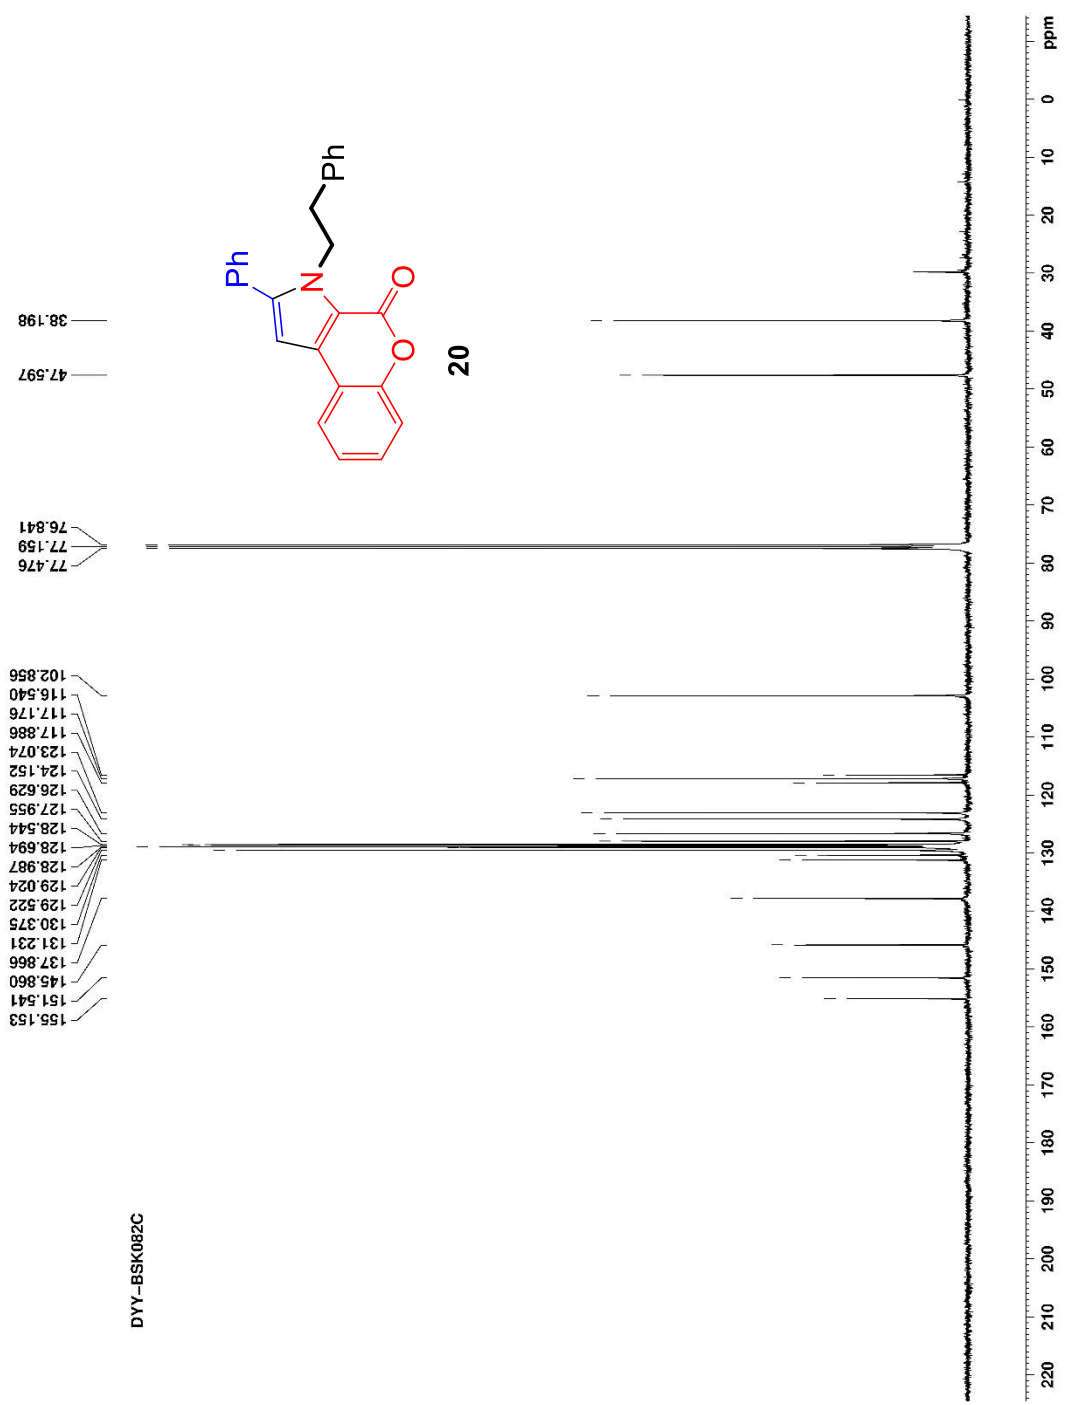

DYY-BSK082C
